# Supplementary material for: Synthesis, stoichiometry and structure of the quaternary scandium cuprate Ba3Cu3Sc4O12 and of 334-phase solid solution members Ba3Cu3Sc4 − xInxO12 (0 ≤ x ≤ 4)
Source: Royal Society of Chemistry journal article supplement (doi:10.1039/b008787o), 2001-01-01
Supplement: in3scdis.doc [file in3scdis.doc]

1ba3cu3insc3o12                                                              Version        2000-10-12T13:05:50  Page   1


                |----------------------------------------------|
                |         Program DISAGL Version MS-DOS        |
                | Crystal structure distance and angle program |
                |   Distributed on 15/ 7/1999; 0:25:16         |
                |----------------------------------------------|

        |---------------------------------------------------------------|
        |            Allen C. Larson and Robert B. Von Dreele           |
        |      Manuel Lujan, Jr. Neutron Scattering Center, MS-H805     |
        |      Los Alamos National Laboratory, Los Alamos, NM  87545    |
        |                                                               |
        | Copyright, 1999, The Regents of the University of California. |
        |---------------------------------------------------------------|
 
 The last history record is :
     HSTRY831 EXPEDT  MS-DOS 2000-10-12T13:05:42                          D  C   

 Space group I 4/m c m           
 The lattice is centric  I-centered tetragonal    Laue symmetry 4/mmm 
  Multiplicity of a general site is  32
  The symmetry of the point 0,0,0 contains 1bar

 The equivalent positions are:

 ( 1)     X      Y      Z  ( 2)    -Y      X      Z 
 ( 3)    -X     -Y      Z  ( 4)     Y     -X      Z 
 ( 5)    -X      Y  1/2+Z  ( 6)    -Y     -X  1/2+Z 
 ( 7)     X     -Y  1/2+Z  ( 8)     Y      X  1/2+Z 
 
 GENLES was run on 2000-10-10T13:14:22     Total cycles run1219   

 The Current Least-Squares controls are

 Maximum number of cycles is    6
 I/SigI cut-off is  1.00
 
 The atom type radii are

 TYPE     BOND      ANGLE
 BA       2.44000   2.24000
 CU       1.48000   1.28000
 IN       1.86000   1.66000
 SC       1.84000   1.64000
 O        1.09000    .89000
 AL       1.60000   1.43000

 Lattice constants are   12.07195  12.07195   8.48557  .00000  .00000  .00000
   Standard deviations     .00023    .00023    .00019  .00000  .00000  .00000

 DMAX is    4.50000 DAGL is     .00000 and IAGL is     0

 The atoms read in are
1ba3cu3insc3o12                                                     DISAGL   Version MS-DOS 2000-10-12T13:05:51  Page   2

  BA1       .0000000(0)   .0000000(0)   .0000000(0) 4/M(001)  BA      1 1.000(0)
  BA2       .27909(7)     .77909(7)     .0000000(0) MM2(110)  BA      2 1.000(0)
  CU3       .5000000(0)   .0000000(0)   .2500000(0) -42M 001  CU      3 1.000(0)
  CU4       .10530(17)    .60530(17)    .0000000(0) MM2(110)  CU      4 1.000(0)
  IN5       .24254(8)     .0000000(0)   .2500000(0)   2(100)  IN      5  .799(4)
  SC6       .24254(8)     .0000000(0)   .2500000(0)   2(100)  SC      6  .201(4)
  O7        .1126(6)      .6126(6)      .2248(10)     M(+-0)  O       7 1.000(0)
  O8        .1303(7)      .1303(7)      .2500000(0)   2(110)  O       8 1.000(0)
  O9        .2373(11)     .5036(6)      .0000000(0)   M(001)  O       9 1.000(0)
1ba3cu3insc3o12                                                     DISAGL   Version MS-DOS 2000-10-12T13:05:51  Page   3


       Vector         Length           Optr Cell        Neighbor atom coordinates
      BA1_BA1         4.24279(10)        5 0 0-1      .00000    .00000   -.50000
      BA1_BA1         4.24279(10)        5 0 0 0      .00000    .00000    .50000
      BA1_BA2         4.29689(16)        1 0-1 0      .27909   -.22091    .00000
      BA1_BA2         4.29689(16)        2 1 0 0      .22091    .27909    .00000
      BA1_BA2         4.29689(16)        3 0 1 0     -.27909    .22091    .00000
      BA1_BA2         4.29689(16)        4-1 0 0     -.22091   -.27909    .00000
      BA1_IN5         3.6156(8)          1 0 0 0      .24254    .00000    .25000
      BA1_IN5         3.6156(8)          2 0 0 0      .00000    .24254    .25000
      BA1_IN5         3.6156(8)          3 0 0 0     -.24254    .00000    .25000
      BA1_IN5         3.6156(8)          4 0 0 0      .00000   -.24254    .25000
      BA1_IN5         3.6156(8)          5 0 0-1     -.24254    .00000   -.25000
      BA1_IN5         3.6156(8)          6 0 0-1      .00000   -.24254   -.25000
      BA1_IN5         3.6156(8)          7 0 0-1      .24254    .00000   -.25000
      BA1_IN5         3.6156(8)          8 0 0-1      .00000    .24254   -.25000
      BA1_SC6         3.6156(8)          1 0 0 0      .24254    .00000    .25000
      BA1_SC6         3.6156(8)          2 0 0 0      .00000    .24254    .25000
      BA1_SC6         3.6156(8)          3 0 0 0     -.24254    .00000    .25000
      BA1_SC6         3.6156(8)          4 0 0 0      .00000   -.24254    .25000
      BA1_SC6         3.6156(8)          5 0 0-1     -.24254    .00000   -.25000
      BA1_SC6         3.6156(8)          6 0 0-1      .00000   -.24254   -.25000
      BA1_SC6         3.6156(8)          7 0 0-1      .24254    .00000   -.25000
      BA1_SC6         3.6156(8)          8 0 0-1      .00000    .24254   -.25000
      BA1_O8          3.073(8)           1 0 0 0      .13025    .13025    .25000
      BA1_O8          3.073(8)           2 0 0 0     -.13025    .13025    .25000
      BA1_O8          3.073(8)           3 0 0 0     -.13025   -.13025    .25000
     *BA1_O8          3.073(8)           4 0 0 0      .13025   -.13025    .25000
     *BA1_O8          3.073(8)           5 0 0-1     -.13025    .13025   -.25000
     *BA1_O8          3.073(8)           6 0 0-1     -.13025   -.13025   -.25000
     *BA1_O8          3.073(8)           7 0 0-1      .13025   -.13025   -.25000
     *BA1_O8          3.073(8)           8 0 0-1      .13025    .13025   -.25000
     *BA1_O9          3.171(13)        105 0-1-1      .26268    .00359    .00000
     *BA1_O9          3.171(13)        106 0 0-1     -.00359    .26268    .00000
     *BA1_O9          3.171(13)        107-1 0-1     -.26268   -.00359    .00000
     *BA1_O9          3.171(13)        108-1-1-1      .00359   -.26268    .00000
 **** More than 24 Interatomic distances found ****
 Angles will be calculated between the first 25

            Angle             Degrees         atom 1 loc  atom 3 loc
         BA1_BA1_BA1         180.000(0)         5 0 0-1     5 0 0 0
         BA1_BA1_BA2          90.000(0)         5 0 0-1     1 0-1 0
         BA1_BA1_BA2          90.000(0)         5 0 0-1     2 1 0 0
         BA1_BA1_BA2          90.000(0)         5 0 0-1     3 0 1 0
         BA1_BA1_BA2          90.000(0)         5 0 0-1     4-1 0 0
         BA1_BA1_IN5         125.925(9)         5 0 0-1     1 0 0 0
         BA1_BA1_IN5         125.925(9)         5 0 0-1     2 0 0 0
         BA1_BA1_IN5         125.925(9)         5 0 0-1     3 0 0 0
         BA1_BA1_IN5         125.925(9)         5 0 0-1     4 0 0 0
         BA1_BA1_IN5          54.075(9)         5 0 0-1     5 0 0-1
         BA1_BA1_IN5          54.075(9)         5 0 0-1     6 0 0-1
         BA1_BA1_IN5          54.075(9)         5 0 0-1     7 0 0-1
         BA1_BA1_IN5          54.075(9)         5 0 0-1     8 0 0-1
         BA1_BA1_SC6         125.925(9)         5 0 0-1     1 0 0 0
         BA1_BA1_SC6         125.925(9)         5 0 0-1     2 0 0 0
         BA1_BA1_SC6         125.925(9)         5 0 0-1     3 0 0 0
         BA1_BA1_SC6         125.925(9)         5 0 0-1     4 0 0 0
         BA1_BA1_SC6          54.075(9)         5 0 0-1     5 0 0-1
1ba3cu3insc3o12                                                     DISAGL   Version MS-DOS 2000-10-12T13:05:51  Page   4


            Angle             Degrees         atom 1 loc  atom 3 loc
         BA1_BA1_SC6          54.075(9)         5 0 0-1     6 0 0-1
         BA1_BA1_SC6          54.075(9)         5 0 0-1     7 0 0-1
         BA1_BA1_SC6          54.075(9)         5 0 0-1     8 0 0-1
         BA1_BA1_O8          133.65(14)         5 0 0-1     1 0 0 0
         BA1_BA1_O8          133.65(14)         5 0 0-1     2 0 0 0
         BA1_BA1_O9          133.7(4)           5 0 0-1     3 0 0 0
         BA1_BA1_BA2          90.000(0)         5 0 0 0     1 0-1 0
         BA1_BA1_BA2          90.000(0)         5 0 0 0     2 1 0 0
         BA1_BA1_BA2          90.000(0)         5 0 0 0     3 0 1 0
         BA1_BA1_BA2          90.000(0)         5 0 0 0     4-1 0 0
         BA1_BA1_IN5          54.075(9)         5 0 0 0     1 0 0 0
         BA1_BA1_IN5          54.075(9)         5 0 0 0     2 0 0 0
         BA1_BA1_IN5          54.075(9)         5 0 0 0     3 0 0 0
         BA1_BA1_IN5          54.075(9)         5 0 0 0     4 0 0 0
         BA1_BA1_IN5         125.925(9)         5 0 0 0     5 0 0-1
         BA1_BA1_IN5         125.925(9)         5 0 0 0     6 0 0-1
         BA1_BA1_IN5         125.925(9)         5 0 0 0     7 0 0-1
         BA1_BA1_IN5         125.925(9)         5 0 0 0     8 0 0-1
         BA1_BA1_SC6          54.075(9)         5 0 0 0     1 0 0 0
         BA1_BA1_SC6          54.075(9)         5 0 0 0     2 0 0 0
         BA1_BA1_SC6          54.075(9)         5 0 0 0     3 0 0 0
         BA1_BA1_SC6          54.075(9)         5 0 0 0     4 0 0 0
         BA1_BA1_SC6         125.925(9)         5 0 0 0     5 0 0-1
         BA1_BA1_SC6         125.925(9)         5 0 0 0     6 0 0-1
         BA1_BA1_SC6         125.925(9)         5 0 0 0     7 0 0-1
         BA1_BA1_SC6         125.925(9)         5 0 0 0     8 0 0-1
         BA1_BA1_O8           46.35(14)         5 0 0 0     1 0 0 0
         BA1_BA1_O8           46.35(14)         5 0 0 0     2 0 0 0
         BA1_BA1_O9           46.35(13)         5 0 0 0     3 0 0 0
         BA2_BA1_BA2          90.000(0)         1 0-1 0     2 1 0 0
         BA2_BA1_BA2         180.000(0)         1 0-1 0     3 0 1 0
         BA2_BA1_BA2          90.000(0)         1 0-1 0     4-1 0 0
         BA2_BA1_IN5          50.583(12)        1 0-1 0     1 0 0 0
         BA2_BA1_IN5         120.170(13)        1 0-1 0     2 0 0 0
         BA2_BA1_IN5         129.417(12)        1 0-1 0     3 0 0 0
         BA2_BA1_IN5          59.830(13)        1 0-1 0     4 0 0 0
         BA2_BA1_IN5         129.417(12)        1 0-1 0     5 0 0-1
         BA2_BA1_IN5          59.830(13)        1 0-1 0     6 0 0-1
         BA2_BA1_IN5          50.583(12)        1 0-1 0     7 0 0-1
         BA2_BA1_IN5         120.170(13)        1 0-1 0     8 0 0-1
         BA2_BA1_SC6          50.583(12)        1 0-1 0     1 0 0 0
         BA2_BA1_SC6         120.170(13)        1 0-1 0     2 0 0 0
         BA2_BA1_SC6         129.417(12)        1 0-1 0     3 0 0 0
         BA2_BA1_SC6          59.830(13)        1 0-1 0     4 0 0 0
         BA2_BA1_SC6         129.417(12)        1 0-1 0     5 0 0-1
         BA2_BA1_SC6          59.830(13)        1 0-1 0     6 0 0-1
         BA2_BA1_SC6          50.583(12)        1 0-1 0     7 0 0-1
         BA2_BA1_SC6         120.170(13)        1 0-1 0     8 0 0-1
         BA2_BA1_O8           85.202(17)        1 0-1 0     1 0 0 0
         BA2_BA1_O8          135.95(14)         1 0-1 0     2 0 0 0
         BA2_BA1_O9           94.80(30)         1 0-1 0     3 0 0 0
         BA2_BA1_BA2          90.000(0)         2 1 0 0     3 0 1 0
         BA2_BA1_BA2         180.000(0)         2 1 0 0     4-1 0 0
         BA2_BA1_IN5          59.830(13)        2 1 0 0     1 0 0 0
         BA2_BA1_IN5          50.583(12)        2 1 0 0     2 0 0 0
         BA2_BA1_IN5         120.170(13)        2 1 0 0     3 0 0 0
1ba3cu3insc3o12                                                     DISAGL   Version MS-DOS 2000-10-12T13:05:51  Page   5


            Angle             Degrees         atom 1 loc  atom 3 loc
         BA2_BA1_IN5         129.417(12)        2 1 0 0     4 0 0 0
         BA2_BA1_IN5         120.170(13)        2 1 0 0     5 0 0-1
         BA2_BA1_IN5         129.417(12)        2 1 0 0     6 0 0-1
         BA2_BA1_IN5          59.830(13)        2 1 0 0     7 0 0-1
         BA2_BA1_IN5          50.583(12)        2 1 0 0     8 0 0-1
         BA2_BA1_SC6          59.830(13)        2 1 0 0     1 0 0 0
         BA2_BA1_SC6          50.583(12)        2 1 0 0     2 0 0 0
         BA2_BA1_SC6         120.170(13)        2 1 0 0     3 0 0 0
         BA2_BA1_SC6         129.417(12)        2 1 0 0     4 0 0 0
         BA2_BA1_SC6         120.170(13)        2 1 0 0     5 0 0-1
         BA2_BA1_SC6         129.417(12)        2 1 0 0     6 0 0-1
         BA2_BA1_SC6          59.830(13)        2 1 0 0     7 0 0-1
         BA2_BA1_SC6          50.583(12)        2 1 0 0     8 0 0-1
         BA2_BA1_O8           44.05(14)         2 1 0 0     1 0 0 0
         BA2_BA1_O8           85.202(17)        2 1 0 0     2 0 0 0
         BA2_BA1_O9          135.95(22)         2 1 0 0     3 0 0 0
         BA2_BA1_BA2          90.000(0)         3 0 1 0     4-1 0 0
         BA2_BA1_IN5         129.417(12)        3 0 1 0     1 0 0 0
         BA2_BA1_IN5          59.830(13)        3 0 1 0     2 0 0 0
         BA2_BA1_IN5          50.583(12)        3 0 1 0     3 0 0 0
         BA2_BA1_IN5         120.170(13)        3 0 1 0     4 0 0 0
         BA2_BA1_IN5          50.583(12)        3 0 1 0     5 0 0-1
         BA2_BA1_IN5         120.170(13)        3 0 1 0     6 0 0-1
         BA2_BA1_IN5         129.417(12)        3 0 1 0     7 0 0-1
         BA2_BA1_IN5          59.830(13)        3 0 1 0     8 0 0-1
         BA2_BA1_SC6         129.417(12)        3 0 1 0     1 0 0 0
         BA2_BA1_SC6          59.830(13)        3 0 1 0     2 0 0 0
         BA2_BA1_SC6          50.583(12)        3 0 1 0     3 0 0 0
         BA2_BA1_SC6         120.170(13)        3 0 1 0     4 0 0 0
         BA2_BA1_SC6          50.583(12)        3 0 1 0     5 0 0-1
         BA2_BA1_SC6         120.170(13)        3 0 1 0     6 0 0-1
         BA2_BA1_SC6         129.417(12)        3 0 1 0     7 0 0-1
         BA2_BA1_SC6          59.830(13)        3 0 1 0     8 0 0-1
         BA2_BA1_O8           94.798(17)        3 0 1 0     1 0 0 0
         BA2_BA1_O8           44.05(14)         3 0 1 0     2 0 0 0
         BA2_BA1_O9           85.20(11)         3 0 1 0     3 0 0 0
         BA2_BA1_IN5         120.170(13)        4-1 0 0     1 0 0 0
         BA2_BA1_IN5         129.417(12)        4-1 0 0     2 0 0 0
         BA2_BA1_IN5          59.830(13)        4-1 0 0     3 0 0 0
         BA2_BA1_IN5          50.583(12)        4-1 0 0     4 0 0 0
         BA2_BA1_IN5          59.830(13)        4-1 0 0     5 0 0-1
         BA2_BA1_IN5          50.583(12)        4-1 0 0     6 0 0-1
         BA2_BA1_IN5         120.170(13)        4-1 0 0     7 0 0-1
         BA2_BA1_IN5         129.417(12)        4-1 0 0     8 0 0-1
         BA2_BA1_SC6         120.170(13)        4-1 0 0     1 0 0 0
         BA2_BA1_SC6         129.417(12)        4-1 0 0     2 0 0 0
         BA2_BA1_SC6          59.830(13)        4-1 0 0     3 0 0 0
         BA2_BA1_SC6          50.583(12)        4-1 0 0     4 0 0 0
         BA2_BA1_SC6          59.830(13)        4-1 0 0     5 0 0-1
         BA2_BA1_SC6          50.583(12)        4-1 0 0     6 0 0-1
         BA2_BA1_SC6         120.170(13)        4-1 0 0     7 0 0-1
         BA2_BA1_SC6         129.417(12)        4-1 0 0     8 0 0-1
         BA2_BA1_O8          135.95(14)         4-1 0 0     1 0 0 0
         BA2_BA1_O8           94.798(17)        4-1 0 0     2 0 0 0
         BA2_BA1_O9           44.05(15)         4-1 0 0     3 0 0 0
         IN5_BA1_IN5          69.864(10)        1 0 0 0     2 0 0 0
1ba3cu3insc3o12                                                     DISAGL   Version MS-DOS 2000-10-12T13:05:51  Page   6


            Angle             Degrees         atom 1 loc  atom 3 loc
         IN5_BA1_IN5         108.150(19)        1 0 0 0     3 0 0 0
         IN5_BA1_IN5          69.864(10)        1 0 0 0     4 0 0 0
         IN5_BA1_IN5         179.980(0)         1 0 0 0     5 0 0-1
         IN5_BA1_IN5         110.136(10)        1 0 0 0     6 0 0-1
         IN5_BA1_IN5          71.850(19)        1 0 0 0     7 0 0-1
         IN5_BA1_IN5         110.136(10)        1 0 0 0     8 0 0-1
         IN5_BA1_SC6            .000(0)         1 0 0 0     1 0 0 0
         IN5_BA1_SC6          69.864(10)        1 0 0 0     2 0 0 0
         IN5_BA1_SC6         108.150(19)        1 0 0 0     3 0 0 0
         IN5_BA1_SC6          69.864(10)        1 0 0 0     4 0 0 0
         IN5_BA1_SC6         179.980(0)         1 0 0 0     5 0 0-1
         IN5_BA1_SC6         110.136(10)        1 0 0 0     6 0 0-1
         IN5_BA1_SC6          71.850(19)        1 0 0 0     7 0 0-1
         IN5_BA1_SC6         110.136(10)        1 0 0 0     8 0 0-1
         IN5_BA1_O8           34.984(9)         1 0 0 0     1 0 0 0
         IN5_BA1_O8           90.53(12)         1 0 0 0     2 0 0 0
         IN5_BA1_O9           90.53(20)         1 0 0 0     3 0 0 0
         IN5_BA1_IN5          69.864(10)        2 0 0 0     3 0 0 0
         IN5_BA1_IN5         108.150(19)        2 0 0 0     4 0 0 0
         IN5_BA1_IN5         110.136(10)        2 0 0 0     5 0 0-1
         IN5_BA1_IN5         179.980(0)         2 0 0 0     6 0 0-1
         IN5_BA1_IN5         110.136(10)        2 0 0 0     7 0 0-1
         IN5_BA1_IN5          71.850(19)        2 0 0 0     8 0 0-1
         IN5_BA1_SC6          69.864(10)        2 0 0 0     1 0 0 0
         IN5_BA1_SC6            .000(0)         2 0 0 0     2 0 0 0
         IN5_BA1_SC6          69.864(10)        2 0 0 0     3 0 0 0
         IN5_BA1_SC6         108.150(19)        2 0 0 0     4 0 0 0
         IN5_BA1_SC6         110.136(10)        2 0 0 0     5 0 0-1
         IN5_BA1_SC6         179.980(0)         2 0 0 0     6 0 0-1
         IN5_BA1_SC6         110.136(10)        2 0 0 0     7 0 0-1
         IN5_BA1_SC6          71.850(19)        2 0 0 0     8 0 0-1
         IN5_BA1_O8           34.984(9)         2 0 0 0     1 0 0 0
         IN5_BA1_O8           34.984(9)         2 0 0 0     2 0 0 0
         IN5_BA1_O9           90.53(11)         2 0 0 0     3 0 0 0
         IN5_BA1_IN5          69.864(10)        3 0 0 0     4 0 0 0
         IN5_BA1_IN5          71.850(19)        3 0 0 0     5 0 0-1
         IN5_BA1_IN5         110.136(10)        3 0 0 0     6 0 0-1
         IN5_BA1_IN5         179.980(0)         3 0 0 0     7 0 0-1
         IN5_BA1_IN5         110.136(10)        3 0 0 0     8 0 0-1
         IN5_BA1_SC6         108.150(19)        3 0 0 0     1 0 0 0
         IN5_BA1_SC6          69.864(10)        3 0 0 0     2 0 0 0
         IN5_BA1_SC6            .000(0)         3 0 0 0     3 0 0 0
         IN5_BA1_SC6          69.864(10)        3 0 0 0     4 0 0 0
         IN5_BA1_SC6          71.850(19)        3 0 0 0     5 0 0-1
         IN5_BA1_SC6         110.136(10)        3 0 0 0     6 0 0-1
         IN5_BA1_SC6         179.980(0)         3 0 0 0     7 0 0-1
         IN5_BA1_SC6         110.136(10)        3 0 0 0     8 0 0-1
         IN5_BA1_O8           90.53(12)         3 0 0 0     1 0 0 0
         IN5_BA1_O8           34.984(9)         3 0 0 0     2 0 0 0
         IN5_BA1_O9           34.98(19)         3 0 0 0     3 0 0 0
         IN5_BA1_IN5         110.136(10)        4 0 0 0     5 0 0-1
         IN5_BA1_IN5          71.850(19)        4 0 0 0     6 0 0-1
         IN5_BA1_IN5         110.136(10)        4 0 0 0     7 0 0-1
         IN5_BA1_IN5         179.980(0)         4 0 0 0     8 0 0-1
         IN5_BA1_SC6          69.864(10)        4 0 0 0     1 0 0 0
         IN5_BA1_SC6         108.150(19)        4 0 0 0     2 0 0 0
1ba3cu3insc3o12                                                     DISAGL   Version MS-DOS 2000-10-12T13:05:51  Page   7


            Angle             Degrees         atom 1 loc  atom 3 loc
         IN5_BA1_SC6          69.864(10)        4 0 0 0     3 0 0 0
         IN5_BA1_SC6            .000(0)         4 0 0 0     4 0 0 0
         IN5_BA1_SC6         110.136(10)        4 0 0 0     5 0 0-1
         IN5_BA1_SC6          71.850(19)        4 0 0 0     6 0 0-1
         IN5_BA1_SC6         110.136(10)        4 0 0 0     7 0 0-1
         IN5_BA1_SC6         179.980(0)         4 0 0 0     8 0 0-1
         IN5_BA1_O8           90.53(12)         4 0 0 0     1 0 0 0
         IN5_BA1_O8           90.53(12)         4 0 0 0     2 0 0 0
         IN5_BA1_O9           34.98(20)         4 0 0 0     3 0 0 0
         IN5_BA1_IN5          69.864(10)        5 0 0-1     6 0 0-1
         IN5_BA1_IN5         108.150(19)        5 0 0-1     7 0 0-1
         IN5_BA1_IN5          69.864(10)        5 0 0-1     8 0 0-1
         IN5_BA1_SC6         179.980(0)         5 0 0-1     1 0 0 0
         IN5_BA1_SC6         110.136(10)        5 0 0-1     2 0 0 0
         IN5_BA1_SC6          71.850(19)        5 0 0-1     3 0 0 0
         IN5_BA1_SC6         110.136(10)        5 0 0-1     4 0 0 0
         IN5_BA1_SC6            .000(0)         5 0 0-1     5 0 0-1
         IN5_BA1_SC6          69.864(10)        5 0 0-1     6 0 0-1
         IN5_BA1_SC6         108.150(19)        5 0 0-1     7 0 0-1
         IN5_BA1_SC6          69.864(10)        5 0 0-1     8 0 0-1
         IN5_BA1_O8          145.016(9)         5 0 0-1     1 0 0 0
         IN5_BA1_O8           89.47(12)         5 0 0-1     2 0 0 0
         IN5_BA1_O9           89.47(11)         5 0 0-1     3 0 0 0
         IN5_BA1_IN5          69.864(10)        6 0 0-1     7 0 0-1
         IN5_BA1_IN5         108.150(19)        6 0 0-1     8 0 0-1
         IN5_BA1_SC6         110.136(10)        6 0 0-1     1 0 0 0
         IN5_BA1_SC6         179.980(0)         6 0 0-1     2 0 0 0
         IN5_BA1_SC6         110.136(10)        6 0 0-1     3 0 0 0
         IN5_BA1_SC6          71.850(19)        6 0 0-1     4 0 0 0
         IN5_BA1_SC6          69.864(10)        6 0 0-1     5 0 0-1
         IN5_BA1_SC6            .000(0)         6 0 0-1     6 0 0-1
         IN5_BA1_SC6          69.864(10)        6 0 0-1     7 0 0-1
         IN5_BA1_SC6         108.150(19)        6 0 0-1     8 0 0-1
         IN5_BA1_O8          145.016(9)         6 0 0-1     1 0 0 0
         IN5_BA1_O8          145.016(9)         6 0 0-1     2 0 0 0
         IN5_BA1_O9           89.47(30)         6 0 0-1     3 0 0 0
         IN5_BA1_IN5          69.864(10)        7 0 0-1     8 0 0-1
         IN5_BA1_SC6          71.850(19)        7 0 0-1     1 0 0 0
         IN5_BA1_SC6         110.136(10)        7 0 0-1     2 0 0 0
         IN5_BA1_SC6         179.980(0)         7 0 0-1     3 0 0 0
         IN5_BA1_SC6         110.136(10)        7 0 0-1     4 0 0 0
         IN5_BA1_SC6         108.150(19)        7 0 0-1     5 0 0-1
         IN5_BA1_SC6          69.864(10)        7 0 0-1     6 0 0-1
         IN5_BA1_SC6            .000(0)         7 0 0-1     7 0 0-1
         IN5_BA1_SC6          69.864(10)        7 0 0-1     8 0 0-1
         IN5_BA1_O8           89.47(12)         7 0 0-1     1 0 0 0
         IN5_BA1_O8          145.016(9)         7 0 0-1     2 0 0 0
         IN5_BA1_O9          145.0(6)           7 0 0-1     3 0 0 0
         IN5_BA1_SC6         110.136(10)        8 0 0-1     1 0 0 0
         IN5_BA1_SC6          71.850(19)        8 0 0-1     2 0 0 0
         IN5_BA1_SC6         110.136(10)        8 0 0-1     3 0 0 0
         IN5_BA1_SC6         179.980(0)         8 0 0-1     4 0 0 0
         IN5_BA1_SC6          69.864(10)        8 0 0-1     5 0 0-1
         IN5_BA1_SC6         108.150(19)        8 0 0-1     6 0 0-1
         IN5_BA1_SC6          69.864(10)        8 0 0-1     7 0 0-1
         IN5_BA1_SC6            .000(0)         8 0 0-1     8 0 0-1
1ba3cu3insc3o12                                                     DISAGL   Version MS-DOS 2000-10-12T13:05:51  Page   8


            Angle             Degrees         atom 1 loc  atom 3 loc
         IN5_BA1_O8           89.47(12)         8 0 0-1     1 0 0 0
         IN5_BA1_O8           89.47(12)         8 0 0-1     2 0 0 0
         IN5_BA1_O9          145.02(21)         8 0 0-1     3 0 0 0
         SC6_BA1_SC6          69.864(10)        1 0 0 0     2 0 0 0
         SC6_BA1_SC6         108.150(19)        1 0 0 0     3 0 0 0
         SC6_BA1_SC6          69.864(10)        1 0 0 0     4 0 0 0
         SC6_BA1_SC6         179.980(0)         1 0 0 0     5 0 0-1
         SC6_BA1_SC6         110.136(10)        1 0 0 0     6 0 0-1
         SC6_BA1_SC6          71.850(19)        1 0 0 0     7 0 0-1
         SC6_BA1_SC6         110.136(10)        1 0 0 0     8 0 0-1
         SC6_BA1_O8           34.984(9)         1 0 0 0     1 0 0 0
         SC6_BA1_O8           90.53(12)         1 0 0 0     2 0 0 0
         SC6_BA1_O9           90.53(20)         1 0 0 0     3 0 0 0
         SC6_BA1_SC6          69.864(10)        2 0 0 0     3 0 0 0
         SC6_BA1_SC6         108.150(19)        2 0 0 0     4 0 0 0
         SC6_BA1_SC6         110.136(10)        2 0 0 0     5 0 0-1
         SC6_BA1_SC6         179.980(0)         2 0 0 0     6 0 0-1
         SC6_BA1_SC6         110.136(10)        2 0 0 0     7 0 0-1
         SC6_BA1_SC6          71.850(19)        2 0 0 0     8 0 0-1
         SC6_BA1_O8           34.984(9)         2 0 0 0     1 0 0 0
         SC6_BA1_O8           34.984(9)         2 0 0 0     2 0 0 0
         SC6_BA1_O9           90.53(11)         2 0 0 0     3 0 0 0
         SC6_BA1_SC6          69.864(10)        3 0 0 0     4 0 0 0
         SC6_BA1_SC6          71.850(19)        3 0 0 0     5 0 0-1
         SC6_BA1_SC6         110.136(10)        3 0 0 0     6 0 0-1
         SC6_BA1_SC6         179.980(0)         3 0 0 0     7 0 0-1
         SC6_BA1_SC6         110.136(10)        3 0 0 0     8 0 0-1
         SC6_BA1_O8           90.53(12)         3 0 0 0     1 0 0 0
         SC6_BA1_O8           34.984(9)         3 0 0 0     2 0 0 0
         SC6_BA1_O9           34.98(19)         3 0 0 0     3 0 0 0
         SC6_BA1_SC6         110.136(10)        4 0 0 0     5 0 0-1
         SC6_BA1_SC6          71.850(19)        4 0 0 0     6 0 0-1
         SC6_BA1_SC6         110.136(10)        4 0 0 0     7 0 0-1
         SC6_BA1_SC6         179.980(0)         4 0 0 0     8 0 0-1
         SC6_BA1_O8           90.53(12)         4 0 0 0     1 0 0 0
         SC6_BA1_O8           90.53(12)         4 0 0 0     2 0 0 0
         SC6_BA1_O9           34.98(20)         4 0 0 0     3 0 0 0
         SC6_BA1_SC6          69.864(10)        5 0 0-1     6 0 0-1
         SC6_BA1_SC6         108.150(19)        5 0 0-1     7 0 0-1
         SC6_BA1_SC6          69.864(10)        5 0 0-1     8 0 0-1
         SC6_BA1_O8          145.016(9)         5 0 0-1     1 0 0 0
         SC6_BA1_O8           89.47(12)         5 0 0-1     2 0 0 0
         SC6_BA1_O9           89.47(11)         5 0 0-1     3 0 0 0
         SC6_BA1_SC6          69.864(10)        6 0 0-1     7 0 0-1
         SC6_BA1_SC6         108.150(19)        6 0 0-1     8 0 0-1
         SC6_BA1_O8          145.016(9)         6 0 0-1     1 0 0 0
         SC6_BA1_O8          145.016(9)         6 0 0-1     2 0 0 0
         SC6_BA1_O9           89.47(30)         6 0 0-1     3 0 0 0
         SC6_BA1_SC6          69.864(10)        7 0 0-1     8 0 0-1
         SC6_BA1_O8           89.47(12)         7 0 0-1     1 0 0 0
         SC6_BA1_O8          145.016(9)         7 0 0-1     2 0 0 0
         SC6_BA1_O9          145.0(6)           7 0 0-1     3 0 0 0
         SC6_BA1_O8           89.47(12)         8 0 0-1     1 0 0 0
         SC6_BA1_O8           89.47(12)         8 0 0-1     2 0 0 0
         SC6_BA1_O9          145.02(21)         8 0 0-1     3 0 0 0
          O8_BA1_O8           61.54(16)         1 0 0 0     2 0 0 0
1ba3cu3insc3o12                                                     DISAGL   Version MS-DOS 2000-10-12T13:05:51  Page   9


            Angle             Degrees         atom 1 loc  atom 3 loc
          O8_BA1_O9           92.70(20)         1 0 0 0     3 0 0 0
          O8_BA1_O9           61.54(12)         2 0 0 0     3 0 0 0

       Vector         Length           Optr Cell        Neighbor atom coordinates
      BA2_BA1         4.29689(16)        1 0 1 0      .00000   1.00000    .00000
      BA2_BA1         4.29689(16)      105 0 0-1      .50000    .50000    .00000
      BA2_BA2         4.3575(6)          6 1 1-1      .22091    .72091   -.50000
      BA2_BA2         4.3575(6)          6 1 1 0      .22091    .72091    .50000
      BA2_CU3         4.3271(11)         1 0 1 0      .50000   1.00000    .25000
      BA2_CU3         4.3271(11)         5 1 1-1      .50000   1.00000   -.25000
      BA2_CU4         2.9670(30)         1 0 0 0      .10530    .60530    .00000
      BA2_CU4         4.1779(16)         2 1 1 0      .39470   1.10530    .00000
      BA2_CU4         4.1779(16)         4 0 1 0      .60530    .89470    .00000
      BA2_IN5         3.4361(6)          1 0 1 0      .24254   1.00000    .25000
      BA2_IN5         3.9900(8)          4 0 1 0      .00000    .75746    .25000
      BA2_IN5         3.9900(8)          6 0 1-1      .00000    .75746   -.25000
      BA2_IN5         3.4361(6)          7 0 1-1      .24254   1.00000   -.25000
      BA2_IN5         3.4361(6)        102 0 0-1      .50000    .74254   -.25000
      BA2_IN5         3.9900(8)        103 0 0-1      .25746    .50000   -.25000
      BA2_IN5         3.9900(8)        105 0 0-1      .25746    .50000    .25000
      BA2_IN5         3.4361(6)        108 0 0-1      .50000    .74254    .25000
      BA2_SC6         3.4361(6)          1 0 1 0      .24254   1.00000    .25000
      BA2_SC6         3.9900(8)          4 0 1 0      .00000    .75746    .25000
      BA2_SC6         3.9900(8)          6 0 1-1      .00000    .75746   -.25000
      BA2_SC6         3.4361(6)          7 0 1-1      .24254   1.00000   -.25000
      BA2_SC6         3.4361(6)        102 0 0-1      .50000    .74254   -.25000
      BA2_SC6         3.9900(8)        103 0 0-1      .25746    .50000   -.25000
      BA2_SC6         3.9900(8)        105 0 0-1      .25746    .50000    .25000
      BA2_SC6         3.4361(6)        108 0 0-1      .50000    .74254    .25000
      BA2_O7          3.423(11)          1 0 0 0      .11258    .61258    .22475
      BA2_O7          2.979(8)           6 1 1-1      .38742    .88742   -.27525
      BA2_O7          3.423(11)         -3 0 0 0      .11258    .61258   -.22475
      BA2_O7          2.979(8)          -8 1 1 1      .38742    .88742    .27525
      BA2_O8          2.988(8)           4 0 1 0      .13025    .86975    .25000
      BA2_O8          2.988(8)           7 0 1-1      .13025    .86975   -.25000
      BA2_O8          2.988(8)         102 0 0-1      .36975    .63025   -.25000
      BA2_O8          2.988(8)         105 0 0-1      .36975    .63025    .25000
      BA2_O9          3.364(8)           1 0 0 0      .23732    .50359    .00000
      BA2_O9          2.717(7)           4 0 1 0      .50359    .76268    .00000
      BA2_O9          2.717(7)         105 0 0-1      .26268   1.00359    .00000
      BA2_O9          3.364(8)         108-1 0-1      .00359    .73732    .00000

            Angle             Degrees         atom 1 loc  atom 3 loc
         BA1_BA2_BA1         166.724(32)        1 0 1 0   105 0 0-1
         BA1_BA2_BA2          88.490(7)         1 0 1 0     6 1 1-1
         BA1_BA2_CU3          88.490(12)        1 0 1 0     6 1 1 0
         BA1_BA2_CU4          83.36(4)          1 0 1 0     1 0 0 0
         BA1_BA2_IN5          54.382(5)         1 0 1 0     1 0 1 0
         BA1_BA2_IN5          54.382(15)        1 0 1 0     7 0 1-1
         BA1_BA2_IN5         133.49(5)          1 0 1 0   102 0 0-1
         BA1_BA2_IN5         133.493(19)        1 0 1 0   108 0 0-1
         BA1_BA2_SC6          54.382(5)         1 0 1 0     1 0 1 0
         BA1_BA2_SC6          54.382(15)        1 0 1 0     7 0 1-1
         BA1_BA2_SC6         133.49(5)          1 0 1 0   102 0 0-1
         BA1_BA2_O7          133.5(4)           1 0 1 0   108 0 0-1
         BA1_BA2_O7           94.12(22)         1 0 1 0     6 1 1-1
1ba3cu3insc3o12                                                     DISAGL   Version MS-DOS 2000-10-12T13:05:51  Page  10


            Angle             Degrees         atom 1 loc  atom 3 loc
         BA1_BA2_O7           94.115(20)        1 0 1 0    -8 1 1 1
         BA1_BA2_O8           45.66(15)         1 0 1 0     4 0 1 0
         BA1_BA2_O8           45.66(15)         1 0 1 0     7 0 1-1
         BA1_BA2_O8          131.33(16)         1 0 1 0   102 0 0-1
         BA1_BA2_O9          131.3(4)           1 0 1 0   105 0 0-1
         BA1_BA2_O9          145.82(28)         1 0 1 0     4 0 1 0
         BA1_BA2_O9           47.46(15)         1 0 1 0   105 0 0-1
         BA1_BA2_BA2          88.490(7)       105 0 0-1     6 1 1-1
         BA1_BA2_CU3          88.490(12)      105 0 0-1     6 1 1 0
         BA1_BA2_CU4          83.36(7)        105 0 0-1     1 0 0 0
         BA1_BA2_IN5         133.49(5)        105 0 0-1     1 0 1 0
         BA1_BA2_IN5         133.493(19)      105 0 0-1     7 0 1-1
         BA1_BA2_IN5          54.382(5)       105 0 0-1   102 0 0-1
         BA1_BA2_IN5          54.382(15)      105 0 0-1   108 0 0-1
         BA1_BA2_SC6         133.49(5)        105 0 0-1     1 0 1 0
         BA1_BA2_SC6         133.493(19)      105 0 0-1     7 0 1-1
         BA1_BA2_SC6          54.382(5)       105 0 0-1   102 0 0-1
         BA1_BA2_O7           54.38(14)       105 0 0-1   108 0 0-1
         BA1_BA2_O7           94.12(22)       105 0 0-1     6 1 1-1
         BA1_BA2_O7           94.115(20)      105 0 0-1    -8 1 1 1
         BA1_BA2_O8          131.33(16)       105 0 0-1     4 0 1 0
         BA1_BA2_O8          131.33(16)       105 0 0-1     7 0 1-1
         BA1_BA2_O8           45.66(15)       105 0 0-1   102 0 0-1
         BA1_BA2_O9           45.66(15)       105 0 0-1   105 0 0-1
         BA1_BA2_O9           47.46(27)       105 0 0-1     4 0 1 0
         BA1_BA2_O9          145.8(8)         105 0 0-1   105 0 0-1
         BA2_BA2_CU3         153.643(29)        6 1 1-1     6 1 1 0
         BA2_BA2_CU4          76.822(16)        6 1 1-1     1 0 0 0
         BA2_BA2_IN5         134.87(4)          6 1 1-1     1 0 1 0
         BA2_BA2_IN5          60.217(11)        6 1 1-1     7 0 1-1
         BA2_BA2_IN5          60.217(16)        6 1 1-1   102 0 0-1
         BA2_BA2_IN5         134.873(17)        6 1 1-1   108 0 0-1
         BA2_BA2_SC6         134.87(4)          6 1 1-1     1 0 1 0
         BA2_BA2_SC6          60.217(11)        6 1 1-1     7 0 1-1
         BA2_BA2_SC6          60.217(16)        6 1 1-1   102 0 0-1
         BA2_BA2_O7          134.9(4)           6 1 1-1   108 0 0-1
         BA2_BA2_O7           51.55(22)         6 1 1-1     6 1 1-1
         BA2_BA2_O7          154.81(21)         6 1 1-1    -8 1 1 1
         BA2_BA2_O8          130.80(13)         6 1 1-1     4 0 1 0
         BA2_BA2_O8           43.18(16)         6 1 1-1     7 0 1-1
         BA2_BA2_O8           43.18(16)         6 1 1-1   102 0 0-1
         BA2_BA2_O9          130.80(29)         6 1 1-1   105 0 0-1
         BA2_BA2_O9           98.57(5)          6 1 1-1     4 0 1 0
         BA2_BA2_O9           98.57(28)         6 1 1-1   105 0 0-1
         CU3_BA2_CU4          76.822(29)        6 1 1 0     1 0 0 0
         CU3_BA2_IN5          60.217(18)        6 1 1 0     1 0 1 0
         CU3_BA2_IN5         134.87(6)          6 1 1 0     7 0 1-1
         CU3_BA2_IN5         134.873(25)        6 1 1 0   102 0 0-1
         CU3_BA2_IN5          60.217(16)        6 1 1 0   108 0 0-1
         CU3_BA2_SC6          60.217(18)        6 1 1 0     1 0 1 0
         CU3_BA2_SC6         134.87(6)          6 1 1 0     7 0 1-1
         CU3_BA2_SC6         134.873(25)        6 1 1 0   102 0 0-1
         CU3_BA2_O7           60.22(22)         6 1 1 0   108 0 0-1
         CU3_BA2_O7          154.8(9)           6 1 1 0     6 1 1-1
         CU3_BA2_O7           51.55(20)         6 1 1 0    -8 1 1 1
         CU3_BA2_O8           43.18(16)         6 1 1 0     4 0 1 0
1ba3cu3insc3o12                                                     DISAGL   Version MS-DOS 2000-10-12T13:05:51  Page  11


            Angle             Degrees         atom 1 loc  atom 3 loc
         CU3_BA2_O8          130.80(13)         6 1 1 0     7 0 1-1
         CU3_BA2_O8          130.80(13)         6 1 1 0   102 0 0-1
         CU3_BA2_O9           43.18(16)         6 1 1 0   105 0 0-1
         CU3_BA2_O9           98.57(6)          6 1 1 0     4 0 1 0
         CU3_BA2_O9           98.57(28)         6 1 1 0   105 0 0-1
         CU4_BA2_IN5         117.26(4)          1 0 0 0     1 0 1 0
         CU4_BA2_IN5         117.26(5)          1 0 0 0     7 0 1-1
         CU4_BA2_IN5         117.26(8)          1 0 0 0   102 0 0-1
         CU4_BA2_IN5         117.26(9)          1 0 0 0   108 0 0-1
         CU4_BA2_SC6         117.26(4)          1 0 0 0     1 0 1 0
         CU4_BA2_SC6         117.26(5)          1 0 0 0     7 0 1-1
         CU4_BA2_SC6         117.26(8)          1 0 0 0   102 0 0-1
         CU4_BA2_O7          117.3(5)           1 0 0 0   108 0 0-1
         CU4_BA2_O7          128.4(7)           1 0 0 0     6 1 1-1
         CU4_BA2_O7          128.37(23)         1 0 0 0    -8 1 1 1
         CU4_BA2_O8           80.430(34)        1 0 0 0     4 0 1 0
         CU4_BA2_O8           80.430(34)        1 0 0 0     7 0 1-1
         CU4_BA2_O8           80.43(7)          1 0 0 0   102 0 0-1
         CU4_BA2_O9           80.43(32)         1 0 0 0   105 0 0-1
         CU4_BA2_O9          130.82(31)         1 0 0 0     4 0 1 0
         CU4_BA2_O9          130.8(8)           1 0 0 0   105 0 0-1
         IN5_BA2_IN5          76.251(4)         1 0 1 0     7 0 1-1
         IN5_BA2_IN5         125.49(6)          1 0 1 0   102 0 0-1
         IN5_BA2_IN5          79.525(30)        1 0 1 0   108 0 0-1
         IN5_BA2_SC6            .000(0)         1 0 1 0     1 0 1 0
         IN5_BA2_SC6          76.251(4)         1 0 1 0     7 0 1-1
         IN5_BA2_SC6         125.49(6)          1 0 1 0   102 0 0-1
         IN5_BA2_O7           79.53(15)         1 0 1 0   108 0 0-1
         IN5_BA2_O7          101.52(20)         1 0 1 0     6 1 1-1
         IN5_BA2_O7           39.797(14)        1 0 1 0    -8 1 1 1
         IN5_BA2_O8           36.881(35)        1 0 1 0     4 0 1 0
         IN5_BA2_O8           94.41(15)         1 0 1 0     7 0 1-1
         IN5_BA2_O8          162.21(14)         1 0 1 0   102 0 0-1
         IN5_BA2_O9           94.33(16)         1 0 1 0   105 0 0-1
         IN5_BA2_O9          100.64(22)         1 0 1 0     4 0 1 0
         IN5_BA2_O9           38.427(24)        1 0 1 0   105 0 0-1
         IN5_BA2_IN5          79.525(30)        7 0 1-1   102 0 0-1
         IN5_BA2_IN5         125.49(5)          7 0 1-1   108 0 0-1
         IN5_BA2_SC6          76.251(4)         7 0 1-1     1 0 1 0
         IN5_BA2_SC6            .000(0)         7 0 1-1     7 0 1-1
         IN5_BA2_SC6          79.525(30)        7 0 1-1   102 0 0-1
         IN5_BA2_O7          125.49(26)         7 0 1-1   108 0 0-1
         IN5_BA2_O7           39.80(5)          7 0 1-1     6 1 1-1
         IN5_BA2_O7          101.52(16)         7 0 1-1    -8 1 1 1
         IN5_BA2_O8           94.41(15)         7 0 1-1     4 0 1 0
         IN5_BA2_O8           36.88(4)          7 0 1-1     7 0 1-1
         IN5_BA2_O8           94.33(13)         7 0 1-1   102 0 0-1
         IN5_BA2_O9          162.2(6)           7 0 1-1   105 0 0-1
         IN5_BA2_O9          100.64(22)         7 0 1-1     4 0 1 0
         IN5_BA2_O9           38.427(21)        7 0 1-1   105 0 0-1
         IN5_BA2_IN5          76.251(4)       102 0 0-1   108 0 0-1
         IN5_BA2_SC6         125.49(6)        102 0 0-1     1 0 1 0
         IN5_BA2_SC6          79.525(30)      102 0 0-1     7 0 1-1
         IN5_BA2_SC6            .000(0)       102 0 0-1   102 0 0-1
         IN5_BA2_O7           76.25(14)       102 0 0-1   108 0 0-1
         IN5_BA2_O7           39.80(5)        102 0 0-1     6 1 1-1
1ba3cu3insc3o12                                                     DISAGL   Version MS-DOS 2000-10-12T13:05:51  Page  12


            Angle             Degrees         atom 1 loc  atom 3 loc
         IN5_BA2_O7          101.52(16)       102 0 0-1    -8 1 1 1
         IN5_BA2_O8          162.21(14)       102 0 0-1     4 0 1 0
         IN5_BA2_O8           94.33(13)       102 0 0-1     7 0 1-1
         IN5_BA2_O8           36.881(35)      102 0 0-1   102 0 0-1
         IN5_BA2_O9           94.41(12)       102 0 0-1   105 0 0-1
         IN5_BA2_O9           38.427(34)      102 0 0-1     4 0 1 0
         IN5_BA2_O9          100.64(30)       102 0 0-1   105 0 0-1
         IN5_BA2_SC6          79.525(30)      108 0 0-1     1 0 1 0
         IN5_BA2_SC6         125.49(5)        108 0 0-1     7 0 1-1
         IN5_BA2_SC6          76.251(4)       108 0 0-1   102 0 0-1
         IN5_BA2_O7             .000(0)       108 0 0-1   108 0 0-1
         IN5_BA2_O7          101.52(20)       108 0 0-1     6 1 1-1
         IN5_BA2_O7           39.797(17)      108 0 0-1    -8 1 1 1
         IN5_BA2_O8           94.33(13)       108 0 0-1     4 0 1 0
         IN5_BA2_O8          162.21(4)        108 0 0-1     7 0 1-1
         IN5_BA2_O8           94.41(15)       108 0 0-1   102 0 0-1
         IN5_BA2_O9           36.88(20)       108 0 0-1   105 0 0-1
         IN5_BA2_O9           38.427(31)      108 0 0-1     4 0 1 0
         IN5_BA2_O9          100.64(30)       108 0 0-1   105 0 0-1
         SC6_BA2_SC6          76.251(4)         1 0 1 0     7 0 1-1
         SC6_BA2_SC6         125.49(6)          1 0 1 0   102 0 0-1
         SC6_BA2_O7           79.53(15)         1 0 1 0   108 0 0-1
         SC6_BA2_O7          101.52(20)         1 0 1 0     6 1 1-1
         SC6_BA2_O7           39.797(14)        1 0 1 0    -8 1 1 1
         SC6_BA2_O8           36.881(35)        1 0 1 0     4 0 1 0
         SC6_BA2_O8           94.41(15)         1 0 1 0     7 0 1-1
         SC6_BA2_O8          162.21(14)         1 0 1 0   102 0 0-1
         SC6_BA2_O9           94.33(16)         1 0 1 0   105 0 0-1
         SC6_BA2_O9          100.64(22)         1 0 1 0     4 0 1 0
         SC6_BA2_O9           38.427(24)        1 0 1 0   105 0 0-1
         SC6_BA2_SC6          79.525(30)        7 0 1-1   102 0 0-1
         SC6_BA2_O7          125.49(26)         7 0 1-1   108 0 0-1
         SC6_BA2_O7           39.80(5)          7 0 1-1     6 1 1-1
         SC6_BA2_O7          101.52(16)         7 0 1-1    -8 1 1 1
         SC6_BA2_O8           94.41(15)         7 0 1-1     4 0 1 0
         SC6_BA2_O8           36.88(4)          7 0 1-1     7 0 1-1
         SC6_BA2_O8           94.33(13)         7 0 1-1   102 0 0-1
         SC6_BA2_O9          162.2(6)           7 0 1-1   105 0 0-1
         SC6_BA2_O9          100.64(22)         7 0 1-1     4 0 1 0
         SC6_BA2_O9           38.427(21)        7 0 1-1   105 0 0-1
         SC6_BA2_O7           76.25(14)       102 0 0-1   108 0 0-1
         SC6_BA2_O7           39.80(5)        102 0 0-1     6 1 1-1
         SC6_BA2_O7          101.52(16)       102 0 0-1    -8 1 1 1
         SC6_BA2_O8          162.21(14)       102 0 0-1     4 0 1 0
         SC6_BA2_O8           94.33(13)       102 0 0-1     7 0 1-1
         SC6_BA2_O8           36.881(35)      102 0 0-1   102 0 0-1
         SC6_BA2_O9           94.41(12)       102 0 0-1   105 0 0-1
         SC6_BA2_O9           38.427(34)      102 0 0-1     4 0 1 0
         SC6_BA2_O9          100.64(30)       102 0 0-1   105 0 0-1
          O7_BA2_O7          101.5(4)         108 0 0-1     6 1 1-1
          O7_BA2_O7           39.80(9)        108 0 0-1    -8 1 1 1
          O7_BA2_O8           94.3(4)         108 0 0-1     4 0 1 0
          O7_BA2_O8          162.2(13)        108 0 0-1     7 0 1-1
          O7_BA2_O8           94.41(27)       108 0 0-1   102 0 0-1
          O7_BA2_O9           36.9(4)         108 0 0-1   105 0 0-1
          O7_BA2_O9           38.43(14)       108 0 0-1     4 0 1 0
1ba3cu3insc3o12                                                     DISAGL   Version MS-DOS 2000-10-12T13:05:51  Page  13


            Angle             Degrees         atom 1 loc  atom 3 loc
          O7_BA2_O9          100.64(30)       108 0 0-1   105 0 0-1
          O7_BA2_O7          103.25(34)         6 1 1-1    -8 1 1 1
          O7_BA2_O8          131.3(5)           6 1 1-1     4 0 1 0
          O7_BA2_O8           63.04(31)         6 1 1-1     7 0 1-1
          O7_BA2_O8           63.03(31)         6 1 1-1   102 0 0-1
          O7_BA2_O9          131.3(5)           6 1 1-1   105 0 0-1
          O7_BA2_O9           66.06(16)         6 1 1-1     4 0 1 0
          O7_BA2_O9           66.06(17)         6 1 1-1   105 0 0-1
          O7_BA2_O8           63.04(13)        -8 1 1 1     4 0 1 0
          O7_BA2_O8          131.29(14)        -8 1 1 1     7 0 1-1
          O7_BA2_O8          131.29(14)        -8 1 1 1   102 0 0-1
          O7_BA2_O9           63.03(16)        -8 1 1 1   105 0 0-1
          O7_BA2_O9           66.06(16)        -8 1 1 1     4 0 1 0
          O7_BA2_O9           66.06(18)        -8 1 1 1   105 0 0-1
          O8_BA2_O8           90.48(30)         4 0 1 0     7 0 1-1
          O8_BA2_O8          160.86(7)          4 0 1 0   102 0 0-1
          O8_BA2_O9           86.36(24)         4 0 1 0   105 0 0-1
          O8_BA2_O9          128.79(11)         4 0 1 0     4 0 1 0
          O8_BA2_O9           65.85(31)         4 0 1 0   105 0 0-1
          O8_BA2_O8           86.36(31)         7 0 1-1   102 0 0-1
          O8_BA2_O9          160.9(10)          7 0 1-1   105 0 0-1
          O8_BA2_O9          128.79(11)         7 0 1-1     4 0 1 0
          O8_BA2_O9           65.85(31)         7 0 1-1   105 0 0-1
          O8_BA2_O9           90.48(22)       102 0 0-1   105 0 0-1
          O8_BA2_O9           65.85(15)       102 0 0-1     4 0 1 0
          O8_BA2_O9          128.8(6)         102 0 0-1   105 0 0-1
          O9_BA2_O9           65.85(31)       105 0 0-1     4 0 1 0
          O9_BA2_O9          128.8(9)         105 0 0-1   105 0 0-1
          O9_BA2_O9           98.4(6)           4 0 1 0   105 0 0-1

       Vector         Length           Optr Cell        Neighbor atom coordinates
      CU3_BA2         4.3271(11)         1 0-1 0      .27909   -.22091    .00000
      CU3_BA2         4.3271(11)         3 1 1 0      .72091    .22091    .00000
      CU3_BA2         4.3271(11)         5 1-1 0      .72091   -.22091    .50000
      CU3_BA2         4.3271(11)         7 0 1 0      .27909    .22091    .50000
      CU3_CU3         4.24279(10)        5 1 0-1      .50000    .00000   -.25000
      CU3_CU3         4.24279(10)        5 1 0 0      .50000    .00000    .75000
      CU3_CU4         2.7807(19)         2 1 0 0      .39470    .10530    .00000
      CU3_CU4         2.7807(19)         4 0 0 0      .60530   -.10530    .00000
      CU3_CU4         2.7807(19)         6 1 0 0      .39470   -.10530    .50000
      CU3_CU4         2.7807(19)         8 0 0 0      .60530    .10530    .50000
      CU3_IN5         3.1081(10)         1 0 0 0      .24254    .00000    .25000
      CU3_IN5         3.1081(10)         3 1 0 0      .75746    .00000    .25000
      CU3_IN5         3.1081(10)       106 0 0-1      .50000    .25746    .25000
      CU3_IN5         3.1081(10)       108 0-1-1      .50000   -.25746    .25000
      CU3_SC6         3.1081(10)         1 0 0 0      .24254    .00000    .25000
      CU3_SC6         3.1081(10)         3 1 0 0      .75746    .00000    .25000
      CU3_SC6         3.1081(10)       106 0 0-1      .50000    .25746    .25000
      CU3_SC6         3.1081(10)       108 0-1-1      .50000   -.25746    .25000
      CU3_O7          1.934(10)          2 1 0 0      .38742    .11258    .22475
      CU3_O7          1.934(10)          4 0 0 0      .61258   -.11258    .22475
      CU3_O7          4.464(8)           6 1 0 0      .38742   -.11258    .72475
      CU3_O7          4.464(8)           8 0 0 0      .61258    .11258    .72475
      CU3_O7          4.464(8)          -2 0 0 0      .61258   -.11258   -.22475
      CU3_O7          4.464(8)          -4 1 0 0      .38742    .11258   -.22475
      CU3_O7          1.934(10)         -6 0 0 1      .61258    .11258    .27525
1ba3cu3insc3o12                                                     DISAGL   Version MS-DOS 2000-10-12T13:05:51  Page  14


       Vector         Length           Optr Cell        Neighbor atom coordinates
      CU3_O7          1.934(10)         -8 1 0 1      .38742   -.11258    .27525
      CU3_O9          3.565(10)          2 1 0 0      .49641    .23732    .00000
      CU3_O9          3.565(10)          4 0 0 0      .50359   -.23732    .00000
      CU3_O9          3.565(10)          6 1 0 0      .49641   -.23732    .50000
      CU3_O9          3.565(10)          8 0 0 0      .50359    .23732    .50000
      CU3_O9          3.565(10)        101 0-1 0      .73732    .00359    .50000
      CU3_O9          3.565(10)        103 0 0 0      .26268   -.00359    .50000
      CU3_O9          3.565(10)        105 0-1-1      .26268    .00359    .00000
      CU3_O9          3.565(10)        107 0 0-1      .73732   -.00359    .00000

            Angle             Degrees         atom 1 loc  atom 3 loc
          O7_CU3_O7          167.(4)            2 1 0 0     4 0 0 0
          O7_CU3_O7           90.70(6)          2 1 0 0    -6 0 0 1
          O7_CU3_O9           90.7(4)           2 1 0 0    -8 1 0 1
          O7_CU3_O7           90.7(4)           4 0 0 0    -6 0 0 1
          O7_CU3_O9           90.7(8)           4 0 0 0    -8 1 0 1
          O7_CU3_O9          167.(5)           -6 0 0 1    -8 1 0 1

       Vector         Length           Optr Cell        Neighbor atom coordinates
      CU4_BA2         2.9670(30)         1 0 0 0      .27909    .77909    .00000
      CU4_BA2         4.1779(16)         2 1 0 0      .22091    .27909    .00000
      CU4_BA2         4.1779(16)         4-1 1 0     -.22091    .72091    .00000
      CU4_CU3         2.7807(19)         2 0 0 0      .00000    .50000    .25000
      CU4_CU3         2.7807(19)         6 0 1-1      .00000    .50000   -.25000
      CU4_CU4         3.595(6)           3 0 1 0     -.10530    .39470    .00000
      CU4_IN5         3.0806(6)          4 0 1 0      .00000    .75746    .25000
      CU4_IN5         3.0806(6)          6 0 1-1      .00000    .75746   -.25000
      CU4_IN5         3.0807(6)        103 0 0-1      .25746    .50000   -.25000
      CU4_IN5         3.0807(6)        105 0 0-1      .25746    .50000    .25000
      CU4_SC6         3.0806(6)          4 0 1 0      .00000    .75746    .25000
      CU4_SC6         3.0806(6)          6 0 1-1      .00000    .75746   -.25000
      CU4_SC6         3.0807(6)        103 0 0-1      .25746    .50000   -.25000
      CU4_SC6         3.0807(6)        105 0 0-1      .25746    .50000    .25000
      CU4_O7          1.911(9)           1 0 0 0      .11258    .61258    .22475
      CU4_O7          4.180(10)          3 0 1 0     -.11258    .38742    .22475
      CU4_O7          3.519(9)           5 0 0-1     -.11258    .61258   -.27525
      CU4_O7          3.519(9)           7 0 1-1      .11258    .38742   -.27525
      CU4_O7          4.180(10)         -1 0 1 0     -.11258    .38742   -.22475
      CU4_O7          1.911(9)          -3 0 0 0      .11258    .61258   -.22475
      CU4_O7          3.519(9)          -5 0 1 1      .11258    .38742    .27525
      CU4_O7          3.519(9)          -7 0 0 1     -.11258    .61258    .27525
      CU4_O8          3.845(6)           4 0 1 0      .13025    .86975    .25000
      CU4_O8          3.845(6)           7 0 1-1      .13025    .86975   -.25000
      CU4_O8          3.845(6)         102 0 0-1      .36975    .63025   -.25000
      CU4_O8          3.845(6)         105 0 0-1      .36975    .63025    .25000
      CU4_O9          2.012(11)          1 0 0 0      .23732    .50359    .00000
      CU4_O9          4.340(13)          3 0 1 0     -.23732    .49641    .00000
      CU4_O9          4.340(13)        106 0 0-1     -.00359    .26268    .00000
      CU4_O9          2.012(11)        108-1 0-1      .00359    .73732    .00000

            Angle             Degrees         atom 1 loc  atom 3 loc
         SC6_CU4_O7           86.27(29)         1 0 0 0     1 0 0 0
         SC6_CU4_O8           86.27(11)         1 0 0 0    -3 0 0 0
         SC6_CU4_O9           82.61(22)         1 0 0 0     1 0 0 0
         SC6_CU4_O9           82.61(27)         1 0 0 0   108-1 0-1
          O7_CU4_O8          173.(7)            1 0 0 0    -3 0 0 0
1ba3cu3insc3o12                                                     DISAGL   Version MS-DOS 2000-10-12T13:05:51  Page  15


            Angle             Degrees         atom 1 loc  atom 3 loc
          O7_CU4_O9           89.5(5)           1 0 0 0     1 0 0 0
          O7_CU4_O9           89.5(4)           1 0 0 0   108-1 0-1
          O8_CU4_O9           89.5(5)          -3 0 0 0     1 0 0 0
          O8_CU4_O9           89.52(18)        -3 0 0 0   108-1 0-1
          O9_CU4_O9          165.2(22)          1 0 0 0   108-1 0-1

       Vector         Length           Optr Cell        Neighbor atom coordinates
      IN5_BA1         3.6156(8)          1 0 0 0      .00000    .00000    .00000
      IN5_BA1         3.6156(8)          5 0 0 0      .00000    .00000    .50000
      IN5_BA2         3.4361(6)          1 0-1 0      .27909   -.22091    .00000
      IN5_BA2         3.9900(8)          2 1 0 0      .22091    .27909    .00000
      IN5_BA2         3.9900(8)          6 1 0 0      .22091   -.27909    .50000
      IN5_BA2         3.4361(6)          7 0 1 0      .27909    .22091    .50000
      IN5_CU3         3.1081(10)         1 0 0 0      .50000    .00000    .25000
      IN5_CU4         3.0806(6)          2 1 0 0      .39470    .10530    .00000
      IN5_CU4         3.0806(6)          6 1 0 0      .39470   -.10530    .50000
      IN5_IN5         4.1407(14)         2 0 0 0      .00000    .24254    .25000
      IN5_IN5         4.1407(14)         4 0 0 0      .00000   -.24254    .25000
      IN5_IN5         4.24279(10)        7 0 0-1      .24254    .00000   -.25000
      IN5_IN5         4.24279(10)        7 0 0 0      .24254    .00000    .75000
      IN5_IN5         4.3955(14)       106 0 0-1      .50000    .25746    .25000
      IN5_IN5         4.3955(14)       108 0-1-1      .50000   -.25746    .25000
      IN5_SC6         4.1407(14)         2 0 0 0      .00000    .24254    .25000
      IN5_SC6         4.1407(14)         4 0 0 0      .00000   -.24254    .25000
      IN5_SC6         4.24279(10)        7 0 0-1      .24254    .00000   -.25000
      IN5_SC6         4.24279(10)        7 0 0 0      .24254    .00000    .75000
      IN5_SC6         4.3955(14)       106 0 0-1      .50000    .25746    .25000
      IN5_SC6         4.3955(14)       108 0-1-1      .50000   -.25746    .25000
      IN5_O7          2.2253(15)         2 1 0 0      .38742    .11258    .22475
      IN5_O7          2.2253(15)        -8 1 0 1      .38742   -.11258    .27525
      IN5_O8          2.0760(11)         1 0 0 0      .13025    .13025    .25000
      IN5_O8          2.0760(11)         4 0 0 0      .13025   -.13025    .25000
      IN5_O9          2.1357(15)       103 0 0 0      .26268   -.00359    .50000
      IN5_O9          2.1357(15)       105 0-1-1      .26268    .00359    .00000

            Angle             Degrees         atom 1 loc  atom 3 loc
         BA1_IN5_BA1          71.850(19)        1 0 0 0     5 0 0 0
         BA1_IN5_BA2          75.035(16)        1 0 0 0     1 0-1 0
         BA1_IN5_SC6         117.791(30)        1 0 0 0     7 0 1 0
         BA1_IN5_O7          125.45(27)         1 0 0 0     2 1 0 0
         BA1_IN5_O7          133.87(21)         1 0 0 0    -8 1 0 1
         BA1_IN5_O8           58.08(22)         1 0 0 0     1 0 0 0
         BA1_IN5_O8           58.08(22)         1 0 0 0     4 0 0 0
         BA1_IN5_O9          132.45(34)         1 0 0 0   103 0 0 0
         BA1_IN5_O9           60.62(34)         1 0 0 0   105 0-1-1
         BA1_IN5_BA2         117.791(33)        5 0 0 0     1 0-1 0
         BA1_IN5_SC6          75.035(19)        5 0 0 0     7 0 1 0
         BA1_IN5_O7          133.87(21)         5 0 0 0     2 1 0 0
         BA1_IN5_O7          125.45(27)         5 0 0 0    -8 1 0 1
         BA1_IN5_O8           58.08(22)         5 0 0 0     1 0 0 0
         BA1_IN5_O8           58.08(22)         5 0 0 0     4 0 0 0
         BA1_IN5_O9           60.62(34)         5 0 0 0   103 0 0 0
         BA1_IN5_O9          132.45(34)         5 0 0 0   105 0-1-1
         BA2_IN5_SC6         165.24(28)         1 0-1 0     7 0 1 0
         BA2_IN5_O7          108.28(21)         1 0-1 0     2 1 0 0
         BA2_IN5_O7           58.97(21)         1 0-1 0    -8 1 0 1
1ba3cu3insc3o12                                                     DISAGL   Version MS-DOS 2000-10-12T13:05:51  Page  16


            Angle             Degrees         atom 1 loc  atom 3 loc
         BA2_IN5_O8          132.20(17)         1 0-1 0     1 0 0 0
         BA2_IN5_O8           59.74(22)         1 0-1 0     4 0 0 0
         BA2_IN5_O9          125.65(21)         1 0-1 0   103 0 0 0
         BA2_IN5_O9           52.26(20)         1 0-1 0   105 0-1-1
         SC6_IN5_O7           58.97(21)         7 0 1 0     2 1 0 0
         SC6_IN5_O7          108.28(22)         7 0 1 0    -8 1 0 1
         SC6_IN5_O8           59.74(21)         7 0 1 0     1 0 0 0
         SC6_IN5_O8          132.20(20)         7 0 1 0     4 0 0 0
         SC6_IN5_O9           52.26(21)         7 0 1 0   103 0 0 0
         SC6_IN5_O9          125.65(22)         7 0 1 0   105 0-1-1
          O7_IN5_O7           76.4(5)           2 1 0 0    -8 1 0 1
          O7_IN5_O8           92.90(33)         2 1 0 0     1 0 0 0
          O7_IN5_O8          167.4(4)           2 1 0 0     4 0 0 0
          O7_IN5_O9           91.1(4)           2 1 0 0   103 0 0 0
          O7_IN5_O9           78.6(4)           2 1 0 0   105 0-1-1
          O7_IN5_O8          167.4(4)          -8 1 0 1     1 0 0 0
          O7_IN5_O8           92.90(33)        -8 1 0 1     4 0 0 0
          O7_IN5_O9           78.6(4)          -8 1 0 1   103 0 0 0
          O7_IN5_O9           91.1(4)          -8 1 0 1   105 0-1-1
          O8_IN5_O8           98.5(6)           1 0 0 0     4 0 0 0
          O8_IN5_O9           95.15(28)         1 0 0 0   103 0 0 0
          O8_IN5_O9           93.38(28)         1 0 0 0   105 0-1-1
          O8_IN5_O9           93.38(28)         4 0 0 0   103 0 0 0
          O8_IN5_O9           95.15(28)         4 0 0 0   105 0-1-1
          O9_IN5_O9          166.9(7)         103 0 0 0   105 0-1-1

       Vector         Length           Optr Cell        Neighbor atom coordinates
      SC6_BA1         3.6156(8)          1 0 0 0      .00000    .00000    .00000
      SC6_BA1         3.6156(8)          5 0 0 0      .00000    .00000    .50000
      SC6_BA2         3.4361(6)          1 0-1 0      .27909   -.22091    .00000
      SC6_BA2         3.9900(8)          2 1 0 0      .22091    .27909    .00000
      SC6_BA2         3.9900(8)          6 1 0 0      .22091   -.27909    .50000
      SC6_BA2         3.4361(6)          7 0 1 0      .27909    .22091    .50000
      SC6_CU3         3.1081(10)         1 0 0 0      .50000    .00000    .25000
      SC6_CU4         3.0806(6)          2 1 0 0      .39470    .10530    .00000
      SC6_CU4         3.0806(6)          6 1 0 0      .39470   -.10530    .50000
      SC6_IN5         4.1407(14)         2 0 0 0      .00000    .24254    .25000
      SC6_IN5         4.1407(14)         4 0 0 0      .00000   -.24254    .25000
      SC6_IN5         4.24279(10)        7 0 0-1      .24254    .00000   -.25000
      SC6_IN5         4.24279(10)        7 0 0 0      .24254    .00000    .75000
      SC6_IN5         4.3955(14)       106 0 0-1      .50000    .25746    .25000
      SC6_IN5         4.3955(14)       108 0-1-1      .50000   -.25746    .25000
      SC6_SC6         4.1407(14)         2 0 0 0      .00000    .24254    .25000
      SC6_SC6         4.1407(14)         4 0 0 0      .00000   -.24254    .25000
      SC6_SC6         4.24279(10)        7 0 0-1      .24254    .00000   -.25000
      SC6_SC6         4.24279(10)        7 0 0 0      .24254    .00000    .75000
      SC6_SC6         4.3955(14)       106 0 0-1      .50000    .25746    .25000
      SC6_SC6         4.3955(14)       108 0-1-1      .50000   -.25746    .25000
      SC6_O7          2.2253(15)         2 1 0 0      .38742    .11258    .22475
      SC6_O7          2.2253(15)        -8 1 0 1      .38742   -.11258    .27525
      SC6_O8          2.0760(11)         1 0 0 0      .13025    .13025    .25000
      SC6_O8          2.0760(11)         4 0 0 0      .13025   -.13025    .25000
      SC6_O9          2.1357(15)       103 0 0 0      .26268   -.00359    .50000
      SC6_O9          2.1357(15)       105 0-1-1      .26268    .00359    .00000
1ba3cu3insc3o12                                                     DISAGL   Version MS-DOS 2000-10-12T13:05:51  Page  17


            Angle             Degrees         atom 1 loc  atom 3 loc
         BA1_SC6_BA1          71.850(19)        1 0 0 0     5 0 0 0
         BA1_SC6_BA2          75.035(16)        1 0 0 0     1 0-1 0
         BA1_SC6_SC6         117.791(30)        1 0 0 0     7 0 1 0
         BA1_SC6_O7          125.45(27)         1 0 0 0     2 1 0 0
         BA1_SC6_O7          133.87(21)         1 0 0 0    -8 1 0 1
         BA1_SC6_O8           58.08(22)         1 0 0 0     1 0 0 0
         BA1_SC6_O8           58.08(22)         1 0 0 0     4 0 0 0
         BA1_SC6_O9          132.45(34)         1 0 0 0   103 0 0 0
         BA1_SC6_O9           60.62(34)         1 0 0 0   105 0-1-1
         BA1_SC6_BA2         117.791(33)        5 0 0 0     1 0-1 0
         BA1_SC6_SC6          75.035(19)        5 0 0 0     7 0 1 0
         BA1_SC6_O7          133.87(21)         5 0 0 0     2 1 0 0
         BA1_SC6_O7          125.45(27)         5 0 0 0    -8 1 0 1
         BA1_SC6_O8           58.08(22)         5 0 0 0     1 0 0 0
         BA1_SC6_O8           58.08(22)         5 0 0 0     4 0 0 0
         BA1_SC6_O9           60.62(34)         5 0 0 0   103 0 0 0
         BA1_SC6_O9          132.45(34)         5 0 0 0   105 0-1-1
         BA2_SC6_SC6         165.24(28)         1 0-1 0     7 0 1 0
         BA2_SC6_O7          108.28(21)         1 0-1 0     2 1 0 0
         BA2_SC6_O7           58.97(21)         1 0-1 0    -8 1 0 1
         BA2_SC6_O8          132.20(17)         1 0-1 0     1 0 0 0
         BA2_SC6_O8           59.74(22)         1 0-1 0     4 0 0 0
         BA2_SC6_O9          125.65(21)         1 0-1 0   103 0 0 0
         BA2_SC6_O9           52.26(20)         1 0-1 0   105 0-1-1
         SC6_SC6_O7           58.97(21)         7 0 1 0     2 1 0 0
         SC6_SC6_O7          108.28(22)         7 0 1 0    -8 1 0 1
         SC6_SC6_O8           59.74(21)         7 0 1 0     1 0 0 0
         SC6_SC6_O8          132.20(20)         7 0 1 0     4 0 0 0
         SC6_SC6_O9           52.26(21)         7 0 1 0   103 0 0 0
         SC6_SC6_O9          125.65(22)         7 0 1 0   105 0-1-1
          O7_SC6_O7           76.4(5)           2 1 0 0    -8 1 0 1
          O7_SC6_O8           92.90(33)         2 1 0 0     1 0 0 0
          O7_SC6_O8          167.4(4)           2 1 0 0     4 0 0 0
          O7_SC6_O9           91.1(4)           2 1 0 0   103 0 0 0
          O7_SC6_O9           78.6(4)           2 1 0 0   105 0-1-1
          O7_SC6_O8          167.4(4)          -8 1 0 1     1 0 0 0
          O7_SC6_O8           92.90(33)        -8 1 0 1     4 0 0 0
          O7_SC6_O9           78.6(4)          -8 1 0 1   103 0 0 0
          O7_SC6_O9           91.1(4)          -8 1 0 1   105 0-1-1
          O8_SC6_O8           98.5(6)           1 0 0 0     4 0 0 0
          O8_SC6_O9           95.15(28)         1 0 0 0   103 0 0 0
          O8_SC6_O9           93.38(28)         1 0 0 0   105 0-1-1
          O8_SC6_O9           93.38(28)         4 0 0 0   103 0 0 0
          O8_SC6_O9           95.15(28)         4 0 0 0   105 0-1-1
          O9_SC6_O9          166.9(7)         103 0 0 0   105 0-1-1

       Vector         Length           Optr Cell        Neighbor atom coordinates
       O7_BA2         3.423(11)          1 0 0 0      .27909    .77909    .00000
       O7_BA2         2.979(8)           6 1 1 0      .22091    .72091    .50000
       O7_CU3         1.934(10)          2 0 0 0      .00000    .50000    .25000
       O7_CU3         4.464(8)           6 0 1-1      .00000    .50000   -.25000
       O7_CU4         1.911(9)           1 0 0 0      .10530    .60530    .00000
       O7_CU4         4.180(10)          3 0 1 0     -.10530    .39470    .00000
       O7_CU4         3.519(9)           5 0 0 0     -.10530    .60530    .50000
       O7_CU4         3.519(9)           7 0 1 0      .10530    .39470    .50000
       O7_IN5         2.2253(15)         4 0 1 0      .00000    .75746    .25000
1ba3cu3insc3o12                                                     DISAGL   Version MS-DOS 2000-10-12T13:05:51  Page  18


       Vector         Length           Optr Cell        Neighbor atom coordinates
       O7_IN5         2.2253(15)       105 0 0-1      .25746    .50000    .25000
       O7_SC6         2.2253(15)         4 0 1 0      .00000    .75746    .25000
       O7_SC6         2.2253(15)       105 0 0-1      .25746    .50000    .25000
       O7_O7          3.844(20)          3 0 1 0     -.11258    .38742    .22475
       O7_O7          3.814(18)         -3 0 0 0      .11258    .61258   -.22475
       O7_O7          2.752(15)         -5 0 1 1      .11258    .38742    .27525
       O7_O7          2.752(15)         -7 0 0 1     -.11258    .61258    .27525
       O7_O8          4.2752(5)          3 0 1 0     -.13025    .86975    .25000
       O7_O8          3.119(9)           4 0 1 0      .13025    .86975    .25000
       O7_O8          3.119(9)         105 0 0-1      .36975    .63025    .25000
       O7_O8          4.2752(5)        106 0 0-1      .36975    .36975    .25000
       O7_O9          2.763(10)          1 0 0 0      .23732    .50359    .00000
       O7_O9          3.113(10)          7 0 1 0      .23732    .49641    .50000
       O7_O9          3.113(10)        102 0 0 0     -.00359    .73732    .50000
       O7_O9          2.763(10)        108-1 0-1      .00359    .73732    .00000

            Angle             Degrees         atom 1 loc  atom 3 loc
         BA2_O7_CU3          122.01(12)         6 1 1 0     2 0 0 0
         BA2_O7_CU4          145.4(10)          6 1 1 0     1 0 0 0
         BA2_O7_IN5           81.23(21)         6 1 1 0     4 0 1 0
         BA2_O7_IN5           81.23(21)         6 1 1 0   105 0 0-1
         BA2_O7_SC6           81.23(21)         6 1 1 0     4 0 1 0
         BA2_O7_O9            81.2(5)           6 1 1 0   105 0 0-1
         CU3_O7_CU4           92.63(31)         2 0 0 0     1 0 0 0
         CU3_O7_IN5           96.46(20)         2 0 0 0     4 0 1 0
         CU3_O7_IN5           96.46(20)         2 0 0 0   105 0 0-1
         CU3_O7_SC6           96.46(20)         2 0 0 0     4 0 1 0
         CU3_O7_O9            96.5(7)           2 0 0 0   105 0 0-1
         CU4_O7_IN5           95.98(24)         1 0 0 0     4 0 1 0
         CU4_O7_IN5           95.98(32)         1 0 0 0   105 0 0-1
         CU4_O7_SC6           95.98(24)         1 0 0 0     4 0 1 0
         CU4_O7_O9            96.0(5)           1 0 0 0   105 0 0-1
         IN5_O7_IN5          161.9(4)           4 0 1 0   105 0 0-1
         IN5_O7_SC6             .000(0)         4 0 1 0     4 0 1 0
         IN5_O7_O9           161.9(33)          4 0 1 0   105 0 0-1
         IN5_O7_SC6          161.9(4)         105 0 0-1     4 0 1 0
         IN5_O7_O9              .000(0)       105 0 0-1   105 0 0-1
         SC6_O7_O9           161.9(33)          4 0 1 0   105 0 0-1

       Vector         Length           Optr Cell        Neighbor atom coordinates
       O8_BA1         3.073(8)           1 0 0 0      .00000    .00000    .00000
       O8_BA1         3.073(8)           5 0 0 0      .00000    .00000    .50000
       O8_BA2         2.988(8)           2 1 0 0      .22091    .27909    .00000
       O8_BA2         2.988(8)           7 0 1 0      .27909    .22091    .50000
       O8_CU4         3.845(6)           2 1 0 0      .39470    .10530    .00000
       O8_CU4         3.845(6)           7 0 1 0      .10530    .39470    .50000
       O8_IN5         2.0760(11)         1 0 0 0      .24254    .00000    .25000
       O8_IN5         2.0760(11)         2 0 0 0      .00000    .24254    .25000
       O8_SC6         2.0760(11)         1 0 0 0      .24254    .00000    .25000
       O8_SC6         2.0760(11)         2 0 0 0      .00000    .24254    .25000
       O8_O7          3.119(9)           2 1 0 0      .38742    .11258    .22475
       O8_O7          4.2752(5)          3 0 1 0     -.11258    .38742    .22475
       O8_O7          3.119(9)          -5 0 1 1      .11258    .38742    .27525
       O8_O7          4.2752(5)         -8 1 0 1      .38742   -.11258    .27525
       O8_O8          3.145(16)          2 0 0 0     -.13025    .13025    .25000
       O8_O8          4.447(22)          3 0 0 0     -.13025   -.13025    .25000
1ba3cu3insc3o12                                                     DISAGL   Version MS-DOS 2000-10-12T13:05:51  Page  19


       Vector         Length           Optr Cell        Neighbor atom coordinates
       O8_O8          3.145(16)          4 0 0 0      .13025   -.13025    .25000
       O8_O8          4.24279(10)        8 0 0-1      .13025    .13025   -.25000
       O8_O8          4.24279(10)        8 0 0 0      .13025    .13025    .75000
       O8_O8          4.089(22)        106 0 0-1      .36975    .36975    .25000
       O8_O9          3.109(8)         103 0 0 0      .26268   -.00359    .50000
       O8_O9          3.065(8)         104-1 0 0      .00359    .26268    .50000
       O8_O9          3.065(8)         105 0-1-1      .26268    .00359    .00000
       O8_O9          3.109(8)         106 0 0-1     -.00359    .26268    .00000

            Angle             Degrees         atom 1 loc  atom 3 loc
         BA1_O8_BA1           87.30(29)         1 0 0 0     5 0 0 0
         BA1_O8_BA2           90.286(13)        1 0 0 0     2 1 0 0
         BA1_O8_CU4          170.1(6)           1 0 0 0     7 0 1 0
         BA1_O8_IN5           86.94(23)         1 0 0 0     1 0 0 0
         BA1_O8_IN5           86.94(23)         1 0 0 0     2 0 0 0
         BA1_O8_SC6           86.94(23)         1 0 0 0     1 0 0 0
         BA1_O8_O9            86.9(4)           1 0 0 0     2 0 0 0
         BA1_O8_BA2          170.13(10)         5 0 0 0     2 1 0 0
         BA1_O8_CU4           90.29(6)          5 0 0 0     7 0 1 0
         BA1_O8_IN5           86.94(23)         5 0 0 0     1 0 0 0
         BA1_O8_IN5           86.94(23)         5 0 0 0     2 0 0 0
         BA1_O8_SC6           86.94(23)         5 0 0 0     1 0 0 0
         BA1_O8_O9            86.9(4)           5 0 0 0     2 0 0 0
         BA2_O8_CU4           93.64(29)         2 1 0 0     7 0 1 0
         BA2_O8_IN5          102.49(23)         2 1 0 0     1 0 0 0
         BA2_O8_IN5           83.38(18)         2 1 0 0     2 0 0 0
         BA2_O8_SC6          102.49(23)         2 1 0 0     1 0 0 0
         BA2_O8_O9            83.38(33)         2 1 0 0     2 0 0 0
         CU4_O8_IN5           83.38(14)         7 0 1 0     1 0 0 0
         CU4_O8_IN5          102.49(22)         7 0 1 0     2 0 0 0
         CU4_O8_SC6           83.38(14)         7 0 1 0     1 0 0 0
         CU4_O8_O9           102.5(4)           7 0 1 0     2 0 0 0
         IN5_O8_IN5          171.5(6)           1 0 0 0     2 0 0 0
         IN5_O8_SC6             .000(0)         1 0 0 0     1 0 0 0
         IN5_O8_O9           171.5(12)          1 0 0 0     2 0 0 0
         IN5_O8_SC6          171.5(6)           2 0 0 0     1 0 0 0
         IN5_O8_O9              .000(0)         2 0 0 0     2 0 0 0
         SC6_O8_O9           171.5(12)          1 0 0 0     2 0 0 0

       Vector         Length           Optr Cell        Neighbor atom coordinates
       O9_BA1         3.171(13)        105 0 0-1      .50000    .50000    .00000
       O9_BA2         3.364(8)           1 0 0 0      .27909    .77909    .00000
       O9_BA2         2.717(7)           2 1 0 0      .22091    .27909    .00000
       O9_CU3         3.565(10)          2 0 0 0      .00000    .50000    .25000
       O9_CU3         3.565(10)          6 0 1-1      .00000    .50000   -.25000
       O9_CU4         2.012(11)          1 0 0 0      .10530    .60530    .00000
       O9_CU4         4.340(13)          3 0 1 0     -.10530    .39470    .00000
       O9_IN5         2.1357(15)       103 0 0-1      .25746    .50000   -.25000
       O9_IN5         2.1357(15)       105 0 0-1      .25746    .50000    .25000
       O9_SC6         2.1357(15)       103 0 0-1      .25746    .50000   -.25000
       O9_SC6         2.1357(15)       105 0 0-1      .25746    .50000    .25000
       O9_O7          2.763(10)          1 0 0 0      .11258    .61258    .22475
       O9_O7          3.113(10)          7 0 1-1      .11258    .38742   -.27525
       O9_O7          2.763(10)         -3 0 0 0      .11258    .61258   -.22475
       O9_O7          3.113(10)         -5 0 1 1      .11258    .38742    .27525
       O9_O8          3.065(8)         102 0 0-1      .36975    .63025   -.25000
1ba3cu3insc3o12                                                     DISAGL   Version MS-DOS 2000-10-12T13:05:51  Page  20


       Vector         Length           Optr Cell        Neighbor atom coordinates
       O9_O8          3.109(8)         103 0 0-1      .36975    .36975   -.25000
       O9_O8          3.065(8)         105 0 0-1      .36975    .63025    .25000
       O9_O8          3.109(8)         106 0 0-1      .36975    .36975    .25000
       O9_O9          4.485(18)          2 1 0 0      .49641    .23732    .00000
       O9_O9          4.485(18)          4 0 1 0      .50359    .76268    .00000
       O9_O9          4.24367(31)        7 0 1-1      .23732    .49641   -.50000
       O9_O9          4.24367(31)        7 0 1 0      .23732    .49641    .50000
       O9_O9          4.113(21)        106 0 0-1     -.00359    .26268    .00000
       O9_O9          3.990(21)        108-1 0-1      .00359    .73732    .00000

            Angle             Degrees         atom 1 loc  atom 3 loc
         CU3_O9_CU4          123.4(11)          2 1 0 0     1 0 0 0
         CU3_O9_IN5           89.31(25)         2 1 0 0   103 0 0-1
         CU3_O9_IN5           89.31(25)         2 1 0 0   105 0 0-1
         CU3_O9_SC6           89.31(25)         2 1 0 0   103 0 0-1
         CU3_O9_O9            89.3(4)           2 1 0 0   105 0 0-1
         CU4_O9_IN5           95.89(34)         1 0 0 0   103 0 0-1
         CU4_O9_IN5           95.89(34)         1 0 0 0   105 0 0-1
         CU4_O9_SC6           95.89(34)         1 0 0 0   103 0 0-1
         CU4_O9_O9            95.9(13)          1 0 0 0   105 0 0-1
         IN5_O9_IN5          166.7(7)         103 0 0-1   105 0 0-1
         IN5_O9_SC6             .000(0)       103 0 0-1   103 0 0-1
         IN5_O9_O9           167.(5)          103 0 0-1   105 0 0-1
         IN5_O9_SC6          166.7(7)         105 0 0-1   103 0 0-1
         IN5_O9_O9              .000(0)       105 0 0-1   105 0 0-1
         SC6_O9_O9           167.(5)          103 0 0-1   105 0 0-1
1ba3cu3insc3o12                                                     DISAGL   Version MS-DOS 2000-10-12T13:05:51  Page  21


 Space group P 4/m m m           
 The lattice is centric   primitive tetragonal    Laue symmetry 4/mmm 
  Multiplicity of a general site is  16
  The symmetry of the point 0,0,0 contains 1bar

 The equivalent positions are:

 ( 1)     X      Y      Z  ( 2)    -Y      X      Z 
 ( 3)    -X     -Y      Z  ( 4)     Y     -X      Z 
 ( 5)    -X      Y      Z  ( 6)    -Y     -X      Z 
 ( 7)     X     -Y      Z  ( 8)     Y      X      Z 
 
 GENLES was run on 2000-10-10T13:14:22     Total cycles run1219   

 The Current Least-Squares controls are

 Maximum number of cycles is    6
 I/SigI cut-off is  1.00
 
 The atom type radii are

 TYPE     BOND      ANGLE
 BA       2.44000   2.24000
 CU       1.48000   1.28000
 IN       1.86000   1.66000
 SC       1.84000   1.64000
 O        1.09000    .89000
 AL       1.60000   1.43000

 Lattice constants are    4.19387   4.19387   8.21549  .00000  .00000  .00000
   Standard deviations     .00020    .00020    .00071  .00000  .00000  .00000

 DMAX is    4.50000 DAGL is    1.78000 and IAGL is     0

 The atoms read in are
  BA1       .5000000(0)   .5000000(0)   .2389670(0) 4MM(001)  BA      1 1.000(0)
  IN2       .0000000(0)   .0000000(0)   .0000000(0) 4/MMM001  IN      2 1.000(0)
  CU3       .0000000(0)   .0000000(0)   .5000000(0) 4/MMM001  CU      3  .563(0)
  O4        .5000000(0)   .0000000(0)   .0000000(0)   MMM     O       4  .847(0)
  O5        .0000000(0)   .0000000(0)   .2696310(0) 4MM(001)  O       5  .477(0)
  O6        .5000000(0)   .0000000(0)   .5000000(0)   MMM     O       6  .723(0)
  IN7       .0000000(0)   .0000000(0)   .5000000(0) 4/MMM001  IN      7  .437(0)
1ba3cu3insc3o12                                                     DISAGL   Version MS-DOS 2000-10-12T13:05:51  Page  22


       Vector         Length           Optr Cell        Neighbor atom coordinates
      BA1_BA1         4.19387(20)        1-1 0 0     -.50000    .50000    .23897
      BA1_BA1         4.19387(20)        1 0-1 0      .50000   -.50000    .23897
      BA1_BA1         4.19387(20)        1 0 1 0      .50000   1.50000    .23897
      BA1_BA1         4.19387(20)        1 1 0 0     1.50000    .50000    .23897
      BA1_BA1         3.92646(34)       -1 1 1 0      .50000    .50000   -.23897
      BA1_BA1         4.2890(4)         -1 1 1 1      .50000    .50000    .76103
      BA1_IN2         3.55648(15)        1 0 0 0      .00000    .00000    .00000
      BA1_IN2         3.55648(15)        1 0 1 0      .00000   1.00000    .00000
      BA1_IN2         3.55648(15)        1 1 0 0     1.00000    .00000    .00000
      BA1_IN2         3.55648(15)        1 1 1 0     1.00000   1.00000    .00000
      BA1_CU3         3.65968(16)        1 0 0 0      .00000    .00000    .50000
      BA1_CU3         3.65968(16)        1 0 1 0      .00000   1.00000    .50000
      BA1_CU3         3.65968(16)        1 1 0 0     1.00000    .00000    .50000
      BA1_CU3         3.65968(16)        1 1 1 0     1.00000   1.00000    .50000
      BA1_O4          2.87253(14)        1 0 0 0      .50000    .00000    .00000
      BA1_O4          2.87253(14)        1 0 1 0      .50000   1.00000    .00000
      BA1_O4          2.87253(14)        2 0 0 0      .00000    .50000    .00000
      BA1_O4          2.87253(14)        2 1 0 0     1.00000    .50000    .00000
      BA1_O5          2.97620(14)        1 0 0 0      .00000    .00000    .26963
      BA1_O5          2.97620(14)        1 0 1 0      .00000   1.00000    .26963
      BA1_O5          2.97620(14)        1 1 0 0     1.00000    .00000    .26963
      BA1_O5          2.97620(14)        1 1 1 0     1.00000   1.00000    .26963
      BA1_O6          2.99935(15)        1 0 0 0      .50000    .00000    .50000
      BA1_O6          2.99935(15)        1 0 1 0      .50000   1.00000    .50000
      BA1_O6          2.99935(15)        2 0 0 0      .00000    .50000    .50000
      BA1_O6          2.99935(15)        2 1 0 0     1.00000    .50000    .50000
      BA1_IN7         3.65968(16)        1 0 0 0      .00000    .00000    .50000
      BA1_IN7         3.65968(16)        1 0 1 0      .00000   1.00000    .50000
      BA1_IN7         3.65968(16)        1 1 0 0     1.00000    .00000    .50000
     *BA1_IN7         3.65968(16)        1 1 1 0     1.00000   1.00000    .50000
 **** More than 24 Interatomic distances found ****
 Angles will be calculated between the first 25

            Angle             Degrees         atom 1 loc  atom 3 loc
         BA1_BA1_BA1          90.000(0)         1-1 0 0     1 0-1 0
         BA1_BA1_BA1          90.000(0)         1-1 0 0     1 0 1 0
         BA1_BA1_BA1         180.000(0)         1-1 0 0     1 1 0 0
         BA1_BA1_BA1          90.000(0)         1-1 0 0    -1 1 1 0
         BA1_BA1_BA1          90.000(0)         1-1 0 0    -1 1 1 1
         BA1_BA1_IN2          53.871(1)         1-1 0 0     1 0 0 0
         BA1_BA1_IN2          53.871(1)         1-1 0 0     1 0 1 0
         BA1_BA1_IN2         126.129(1)         1-1 0 0     1 1 0 0
         BA1_BA1_CU3         126.129(2)         1-1 0 0     1 1 1 0
         BA1_BA1_O4           90.000(0)         1-1 0 0     1 0 0 0
         BA1_BA1_O4           90.000(0)         1-1 0 0     1 0 1 0
         BA1_BA1_O4           43.114(3)         1-1 0 0     2 0 0 0
         BA1_BA1_O4          136.886(3)         1-1 0 0     2 1 0 0
         BA1_BA1_O5           45.205(0)         1-1 0 0     1 0 0 0
         BA1_BA1_O5           45.205(0)         1-1 0 0     1 0 1 0
         BA1_BA1_O5          134.795(0)         1-1 0 0     1 1 0 0
         BA1_BA1_O5          134.795(0)         1-1 0 0     1 1 1 0
         BA1_BA1_O6           90.000(0)         1-1 0 0     1 0 0 0
         BA1_BA1_O6           90.000(0)         1-1 0 0     1 0 1 0
         BA1_BA1_O6           45.643(3)         1-1 0 0     2 0 0 0
         BA1_BA1_O6          134.357(3)         1-1 0 0     2 1 0 0
         BA1_BA1_IN7          55.041(1)         1-1 0 0     1 0 0 0
1ba3cu3insc3o12                                                     DISAGL   Version MS-DOS 2000-10-12T13:05:51  Page  23


            Angle             Degrees         atom 1 loc  atom 3 loc
         BA1_BA1_IN7          55.041(1)         1-1 0 0     1 0 1 0
         BA1_BA1_IN7         124.959(1)         1-1 0 0     1 1 0 0
         BA1_BA1_BA1         180.000(0)         1 0-1 0     1 0 1 0
         BA1_BA1_BA1          90.000(0)         1 0-1 0     1 1 0 0
         BA1_BA1_BA1          90.000(0)         1 0-1 0    -1 1 1 0
         BA1_BA1_BA1          90.000(0)         1 0-1 0    -1 1 1 1
         BA1_BA1_IN2          53.871(1)         1 0-1 0     1 0 0 0
         BA1_BA1_IN2         126.129(1)         1 0-1 0     1 0 1 0
         BA1_BA1_IN2          53.871(1)         1 0-1 0     1 1 0 0
         BA1_BA1_CU3         126.129(2)         1 0-1 0     1 1 1 0
         BA1_BA1_O4           43.114(3)         1 0-1 0     1 0 0 0
         BA1_BA1_O4          136.886(3)         1 0-1 0     1 0 1 0
         BA1_BA1_O4           90.000(0)         1 0-1 0     2 0 0 0
         BA1_BA1_O4           90.000(0)         1 0-1 0     2 1 0 0
         BA1_BA1_O5           45.205(0)         1 0-1 0     1 0 0 0
         BA1_BA1_O5          134.795(0)         1 0-1 0     1 0 1 0
         BA1_BA1_O5           45.205(0)         1 0-1 0     1 1 0 0
         BA1_BA1_O5          134.795(0)         1 0-1 0     1 1 1 0
         BA1_BA1_O6           45.643(3)         1 0-1 0     1 0 0 0
         BA1_BA1_O6          134.357(3)         1 0-1 0     1 0 1 0
         BA1_BA1_O6           90.000(0)         1 0-1 0     2 0 0 0
         BA1_BA1_O6           90.000(0)         1 0-1 0     2 1 0 0
         BA1_BA1_IN7          55.041(1)         1 0-1 0     1 0 0 0
         BA1_BA1_IN7         124.959(1)         1 0-1 0     1 0 1 0
         BA1_BA1_IN7          55.041(1)         1 0-1 0     1 1 0 0
         BA1_BA1_BA1          90.000(0)         1 0 1 0     1 1 0 0
         BA1_BA1_BA1          90.000(0)         1 0 1 0    -1 1 1 0
         BA1_BA1_BA1          90.000(0)         1 0 1 0    -1 1 1 1
         BA1_BA1_IN2         126.129(1)         1 0 1 0     1 0 0 0
         BA1_BA1_IN2          53.871(1)         1 0 1 0     1 0 1 0
         BA1_BA1_IN2         126.129(1)         1 0 1 0     1 1 0 0
         BA1_BA1_CU3          53.871(1)         1 0 1 0     1 1 1 0
         BA1_BA1_O4          136.886(3)         1 0 1 0     1 0 0 0
         BA1_BA1_O4           43.114(3)         1 0 1 0     1 0 1 0
         BA1_BA1_O4           90.000(0)         1 0 1 0     2 0 0 0
         BA1_BA1_O4           90.000(0)         1 0 1 0     2 1 0 0
         BA1_BA1_O5          134.795(0)         1 0 1 0     1 0 0 0
         BA1_BA1_O5           45.205(0)         1 0 1 0     1 0 1 0
         BA1_BA1_O5          134.795(0)         1 0 1 0     1 1 0 0
         BA1_BA1_O5           45.205(0)         1 0 1 0     1 1 1 0
         BA1_BA1_O6          134.357(3)         1 0 1 0     1 0 0 0
         BA1_BA1_O6           45.643(3)         1 0 1 0     1 0 1 0
         BA1_BA1_O6           90.000(0)         1 0 1 0     2 0 0 0
         BA1_BA1_O6           90.000(0)         1 0 1 0     2 1 0 0
         BA1_BA1_IN7         124.959(1)         1 0 1 0     1 0 0 0
         BA1_BA1_IN7          55.041(1)         1 0 1 0     1 0 1 0
         BA1_BA1_IN7         124.959(1)         1 0 1 0     1 1 0 0
         BA1_BA1_BA1          90.000(0)         1 1 0 0    -1 1 1 0
         BA1_BA1_BA1          90.000(0)         1 1 0 0    -1 1 1 1
         BA1_BA1_IN2         126.129(1)         1 1 0 0     1 0 0 0
         BA1_BA1_IN2         126.129(1)         1 1 0 0     1 0 1 0
         BA1_BA1_IN2          53.871(1)         1 1 0 0     1 1 0 0
         BA1_BA1_CU3          53.871(1)         1 1 0 0     1 1 1 0
         BA1_BA1_O4           90.000(0)         1 1 0 0     1 0 0 0
         BA1_BA1_O4           90.000(0)         1 1 0 0     1 0 1 0
         BA1_BA1_O4          136.886(3)         1 1 0 0     2 0 0 0
1ba3cu3insc3o12                                                     DISAGL   Version MS-DOS 2000-10-12T13:05:51  Page  24


            Angle             Degrees         atom 1 loc  atom 3 loc
         BA1_BA1_O4           43.114(3)         1 1 0 0     2 1 0 0
         BA1_BA1_O5          134.795(0)         1 1 0 0     1 0 0 0
         BA1_BA1_O5          134.795(0)         1 1 0 0     1 0 1 0
         BA1_BA1_O5           45.205(0)         1 1 0 0     1 1 0 0
         BA1_BA1_O5           45.205(0)         1 1 0 0     1 1 1 0
         BA1_BA1_O6           90.000(0)         1 1 0 0     1 0 0 0
         BA1_BA1_O6           90.000(0)         1 1 0 0     1 0 1 0
         BA1_BA1_O6          134.357(3)         1 1 0 0     2 0 0 0
         BA1_BA1_O6           45.643(3)         1 1 0 0     2 1 0 0
         BA1_BA1_IN7         124.959(1)         1 1 0 0     1 0 0 0
         BA1_BA1_IN7         124.959(1)         1 1 0 0     1 0 1 0
         BA1_BA1_IN7          55.041(1)         1 1 0 0     1 1 0 0
         BA1_BA1_BA1         180.000(0)        -1 1 1 0    -1 1 1 1
         BA1_BA1_IN2          56.495(3)        -1 1 1 0     1 0 0 0
         BA1_BA1_IN2          56.495(3)        -1 1 1 0     1 0 1 0
         BA1_BA1_IN2          56.495(3)        -1 1 1 0     1 1 0 0
         BA1_BA1_CU3          56.495(3)        -1 1 1 0     1 1 1 0
         BA1_BA1_O4           46.886(3)        -1 1 1 0     1 0 0 0
         BA1_BA1_O4           46.886(3)        -1 1 1 0     1 0 1 0
         BA1_BA1_O4           46.886(3)        -1 1 1 0     2 0 0 0
         BA1_BA1_O4           46.886(3)        -1 1 1 0     2 1 0 0
         BA1_BA1_O5           94.856(0)        -1 1 1 0     1 0 0 0
         BA1_BA1_O5           94.856(0)        -1 1 1 0     1 0 1 0
         BA1_BA1_O5           94.856(0)        -1 1 1 0     1 1 0 0
         BA1_BA1_O5           94.856(0)        -1 1 1 0     1 1 1 0
         BA1_BA1_O6          135.643(3)        -1 1 1 0     1 0 0 0
         BA1_BA1_O6          135.643(3)        -1 1 1 0     1 0 1 0
         BA1_BA1_O6          135.643(3)        -1 1 1 0     2 0 0 0
         BA1_BA1_O6          135.643(3)        -1 1 1 0     2 1 0 0
         BA1_BA1_IN7         125.873(3)        -1 1 1 0     1 0 0 0
         BA1_BA1_IN7         125.873(3)        -1 1 1 0     1 0 1 0
         BA1_BA1_IN7         125.873(3)        -1 1 1 0     1 1 0 0
         BA1_BA1_IN2         123.505(3)        -1 1 1 1     1 0 0 0
         BA1_BA1_IN2         123.505(3)        -1 1 1 1     1 0 1 0
         BA1_BA1_IN2         123.505(3)        -1 1 1 1     1 1 0 0
         BA1_BA1_CU3         123.505(2)        -1 1 1 1     1 1 1 0
         BA1_BA1_O4          133.114(3)        -1 1 1 1     1 0 0 0
         BA1_BA1_O4          133.114(3)        -1 1 1 1     1 0 1 0
         BA1_BA1_O4          133.114(3)        -1 1 1 1     2 0 0 0
         BA1_BA1_O4          133.114(3)        -1 1 1 1     2 1 0 0
         BA1_BA1_O5           85.144(0)        -1 1 1 1     1 0 0 0
         BA1_BA1_O5           85.144(0)        -1 1 1 1     1 0 1 0
         BA1_BA1_O5           85.144(0)        -1 1 1 1     1 1 0 0
         BA1_BA1_O5           85.144(0)        -1 1 1 1     1 1 1 0
         BA1_BA1_O6           44.357(3)        -1 1 1 1     1 0 0 0
         BA1_BA1_O6           44.357(3)        -1 1 1 1     1 0 1 0
         BA1_BA1_O6           44.357(3)        -1 1 1 1     2 0 0 0
         BA1_BA1_O6           44.357(3)        -1 1 1 1     2 1 0 0
         BA1_BA1_IN7          54.127(3)        -1 1 1 1     1 0 0 0
         BA1_BA1_IN7          54.127(3)        -1 1 1 1     1 0 1 0
         BA1_BA1_IN7          54.127(3)        -1 1 1 1     1 1 0 0
         IN2_BA1_IN2          72.259(3)         1 0 0 0     1 0 1 0
         IN2_BA1_IN2          72.259(3)         1 0 0 0     1 1 0 0
         IN2_BA1_CU3         112.989(6)         1 0 0 0     1 1 1 0
         IN2_BA1_O4           36.129(1)         1 0 0 0     1 0 0 0
         IN2_BA1_O4           93.046(5)         1 0 0 0     1 0 1 0
1ba3cu3insc3o12                                                     DISAGL   Version MS-DOS 2000-10-12T13:05:51  Page  25


            Angle             Degrees         atom 1 loc  atom 3 loc
         IN2_BA1_O4           36.129(1)         1 0 0 0     2 0 0 0
         IN2_BA1_O4           93.046(5)         1 0 0 0     2 1 0 0
         IN2_BA1_O5           38.361(3)         1 0 0 0     1 0 0 0
         IN2_BA1_O5           92.678(0)         1 0 0 0     1 0 1 0
         IN2_BA1_O5           92.678(0)         1 0 0 0     1 1 0 0
         IN2_BA1_O5          151.350(2)         1 0 0 0     1 1 1 0
         IN2_BA1_O6           88.996(5)         1 0 0 0     1 0 0 0
         IN2_BA1_O6          143.794(1)         1 0 0 0     1 0 1 0
         IN2_BA1_O6           88.996(5)         1 0 0 0     2 0 0 0
         IN2_BA1_O6          143.794(1)         1 0 0 0     2 1 0 0
         IN2_BA1_IN7          69.378(5)         1 0 0 0     1 0 0 0
         IN2_BA1_IN7         108.873(3)         1 0 0 0     1 0 1 0
         IN2_BA1_IN7         108.873(3)         1 0 0 0     1 1 0 0
         IN2_BA1_IN2         112.989(5)         1 0 1 0     1 1 0 0
         IN2_BA1_CU3          72.259(3)         1 0 1 0     1 1 1 0
         IN2_BA1_O4           93.046(5)         1 0 1 0     1 0 0 0
         IN2_BA1_O4           36.129(1)         1 0 1 0     1 0 1 0
         IN2_BA1_O4           36.129(1)         1 0 1 0     2 0 0 0
         IN2_BA1_O4           93.046(5)         1 0 1 0     2 1 0 0
         IN2_BA1_O5           92.678(0)         1 0 1 0     1 0 0 0
         IN2_BA1_O5           38.361(3)         1 0 1 0     1 0 1 0
         IN2_BA1_O5          151.350(2)         1 0 1 0     1 1 0 0
         IN2_BA1_O5           92.678(0)         1 0 1 0     1 1 1 0
         IN2_BA1_O6          143.794(1)         1 0 1 0     1 0 0 0
         IN2_BA1_O6           88.996(5)         1 0 1 0     1 0 1 0
         IN2_BA1_O6           88.996(5)         1 0 1 0     2 0 0 0
         IN2_BA1_O6          143.794(1)         1 0 1 0     2 1 0 0
         IN2_BA1_IN7         108.873(3)         1 0 1 0     1 0 0 0
         IN2_BA1_IN7          69.378(5)         1 0 1 0     1 0 1 0
         IN2_BA1_IN7         177.633(0)         1 0 1 0     1 1 0 0
         IN2_BA1_CU3          72.259(3)         1 1 0 0     1 1 1 0
         IN2_BA1_O4           36.129(1)         1 1 0 0     1 0 0 0
         IN2_BA1_O4           93.046(5)         1 1 0 0     1 0 1 0
         IN2_BA1_O4           93.046(5)         1 1 0 0     2 0 0 0
         IN2_BA1_O4           36.129(1)         1 1 0 0     2 1 0 0
         IN2_BA1_O5           92.678(0)         1 1 0 0     1 0 0 0
         IN2_BA1_O5          151.350(2)         1 1 0 0     1 0 1 0
         IN2_BA1_O5           38.361(3)         1 1 0 0     1 1 0 0
         IN2_BA1_O5           92.678(0)         1 1 0 0     1 1 1 0
         IN2_BA1_O6           88.996(5)         1 1 0 0     1 0 0 0
         IN2_BA1_O6          143.794(1)         1 1 0 0     1 0 1 0
         IN2_BA1_O6          143.794(1)         1 1 0 0     2 0 0 0
         IN2_BA1_O6           88.996(5)         1 1 0 0     2 1 0 0
         IN2_BA1_IN7         108.873(3)         1 1 0 0     1 0 0 0
         IN2_BA1_IN7         177.633(0)         1 1 0 0     1 0 1 0
         IN2_BA1_IN7          69.378(5)         1 1 0 0     1 1 0 0
         CU3_BA1_O4           93.046(5)         1 1 1 0     1 0 0 0
         CU3_BA1_O4           36.129(1)         1 1 1 0     1 0 1 0
         CU3_BA1_O4           93.046(5)         1 1 1 0     2 0 0 0
         CU3_BA1_O4           36.129(1)         1 1 1 0     2 1 0 0
         CU3_BA1_O5          151.350(3)         1 1 1 0     1 0 0 0
         CU3_BA1_O5           92.678(0)         1 1 1 0     1 0 1 0
         CU3_BA1_O5           92.678(0)         1 1 1 0     1 1 0 0
         CU3_BA1_O5           38.361(3)         1 1 1 0     1 1 1 0
         CU3_BA1_O6          143.794(1)         1 1 1 0     1 0 0 0
         CU3_BA1_O6           88.996(4)         1 1 1 0     1 0 1 0
1ba3cu3insc3o12                                                     DISAGL   Version MS-DOS 2000-10-12T13:05:51  Page  26


            Angle             Degrees         atom 1 loc  atom 3 loc
         CU3_BA1_O6          143.794(1)         1 1 1 0     2 0 0 0
         CU3_BA1_O6           88.996(4)         1 1 1 0     2 1 0 0
         CU3_BA1_IN7         177.633(12)        1 1 1 0     1 0 0 0
         CU3_BA1_IN7         108.873(2)         1 1 1 0     1 0 1 0
         CU3_BA1_IN7         108.873(2)         1 1 1 0     1 1 0 0
          O4_BA1_O4           93.772(6)         1 0 0 0     1 0 1 0
          O4_BA1_O4           62.153(3)         1 0 0 0     2 0 0 0
          O4_BA1_O4           62.153(3)         1 0 0 0     2 1 0 0
          O4_BA1_O5           62.840(2)         1 0 0 0     1 0 0 0
          O4_BA1_O5          124.903(1)         1 0 0 0     1 0 1 0
          O4_BA1_O5           62.840(2)         1 0 0 0     1 1 0 0
          O4_BA1_O5          124.903(1)         1 0 0 0     1 1 1 0
          O4_BA1_O6           88.757(6)         1 0 0 0     1 0 0 0
          O4_BA1_O6          177.471(0)         1 0 0 0     1 0 1 0
          O4_BA1_O6          119.253(3)         1 0 0 0     2 0 0 0
          O4_BA1_O6          119.253(3)         1 0 0 0     2 1 0 0
          O4_BA1_IN7          88.981(5)         1 0 0 0     1 0 0 0
          O4_BA1_IN7         144.962(1)         1 0 0 0     1 0 1 0
          O4_BA1_IN7          88.981(5)         1 0 0 0     1 1 0 0
          O4_BA1_O4           62.153(3)         1 0 1 0     2 0 0 0
          O4_BA1_O4           62.153(3)         1 0 1 0     2 1 0 0
          O4_BA1_O5          124.903(1)         1 0 1 0     1 0 0 0
          O4_BA1_O5           62.840(2)         1 0 1 0     1 0 1 0
          O4_BA1_O5          124.903(1)         1 0 1 0     1 1 0 0
          O4_BA1_O5           62.840(2)         1 0 1 0     1 1 1 0
          O4_BA1_O6          177.471(0)         1 0 1 0     1 0 0 0
          O4_BA1_O6           88.757(6)         1 0 1 0     1 0 1 0
          O4_BA1_O6          119.253(3)         1 0 1 0     2 0 0 0
          O4_BA1_O6          119.253(3)         1 0 1 0     2 1 0 0
          O4_BA1_IN7         144.962(1)         1 0 1 0     1 0 0 0
          O4_BA1_IN7          88.981(5)         1 0 1 0     1 0 1 0
          O4_BA1_IN7         144.962(1)         1 0 1 0     1 1 0 0
          O4_BA1_O4           93.772(6)         2 0 0 0     2 1 0 0
          O4_BA1_O5           62.840(2)         2 0 0 0     1 0 0 0
          O4_BA1_O5           62.840(2)         2 0 0 0     1 0 1 0
          O4_BA1_O5          124.903(1)         2 0 0 0     1 1 0 0
          O4_BA1_O5          124.903(1)         2 0 0 0     1 1 1 0
          O4_BA1_O6          119.253(3)         2 0 0 0     1 0 0 0
          O4_BA1_O6          119.253(3)         2 0 0 0     1 0 1 0
          O4_BA1_O6           88.757(6)         2 0 0 0     2 0 0 0
          O4_BA1_O6          177.471(0)         2 0 0 0     2 1 0 0
          O4_BA1_IN7          88.981(5)         2 0 0 0     1 0 0 0
          O4_BA1_IN7          88.981(5)         2 0 0 0     1 0 1 0
          O4_BA1_IN7         144.962(1)         2 0 0 0     1 1 0 0
          O4_BA1_O5          124.903(1)         2 1 0 0     1 0 0 0
          O4_BA1_O5          124.903(1)         2 1 0 0     1 0 1 0
          O4_BA1_O5           62.840(2)         2 1 0 0     1 1 0 0
          O4_BA1_O5           62.840(2)         2 1 0 0     1 1 1 0
          O4_BA1_O6          119.253(3)         2 1 0 0     1 0 0 0
          O4_BA1_O6          119.253(3)         2 1 0 0     1 0 1 0
          O4_BA1_O6          177.471(0)         2 1 0 0     2 0 0 0
          O4_BA1_O6           88.757(6)         2 1 0 0     2 1 0 0
          O4_BA1_IN7         144.962(1)         2 1 0 0     1 0 0 0
          O4_BA1_IN7         144.962(1)         2 1 0 0     1 0 1 0
          O4_BA1_IN7          88.981(5)         2 1 0 0     1 1 0 0
          O5_BA1_O5           89.589(0)         1 0 0 0     1 0 1 0
1ba3cu3insc3o12                                                     DISAGL   Version MS-DOS 2000-10-12T13:05:51  Page  27


            Angle             Degrees         atom 1 loc  atom 3 loc
          O5_BA1_O5           89.589(0)         1 0 0 0     1 1 0 0
          O5_BA1_O5          170.289(1)         1 0 0 0     1 1 1 0
          O5_BA1_O6           56.420(1)         1 0 0 0     1 0 0 0
          O5_BA1_O6          115.599(2)         1 0 0 0     1 0 1 0
          O5_BA1_O6           56.420(1)         1 0 0 0     2 0 0 0
          O5_BA1_O6          115.599(2)         1 0 0 0     2 1 0 0
          O5_BA1_IN7          31.017(2)         1 0 0 0     1 0 0 0
          O5_BA1_IN7          87.157(0)         1 0 0 0     1 0 1 0
          O5_BA1_IN7          87.157(0)         1 0 0 0     1 1 0 0
          O5_BA1_O5          170.289(1)         1 0 1 0     1 1 0 0
          O5_BA1_O5           89.589(0)         1 0 1 0     1 1 1 0
          O5_BA1_O6          115.599(2)         1 0 1 0     1 0 0 0
          O5_BA1_O6           56.420(1)         1 0 1 0     1 0 1 0
          O5_BA1_O6           56.420(1)         1 0 1 0     2 0 0 0
          O5_BA1_O6          115.599(2)         1 0 1 0     2 1 0 0
          O5_BA1_IN7          87.157(0)         1 0 1 0     1 0 0 0
          O5_BA1_IN7          31.017(2)         1 0 1 0     1 0 1 0
          O5_BA1_IN7         139.272(3)         1 0 1 0     1 1 0 0
          O5_BA1_O5           89.589(0)         1 1 0 0     1 1 1 0
          O5_BA1_O6           56.420(1)         1 1 0 0     1 0 0 0
          O5_BA1_O6          115.599(2)         1 1 0 0     1 0 1 0
          O5_BA1_O6          115.599(2)         1 1 0 0     2 0 0 0
          O5_BA1_O6           56.420(1)         1 1 0 0     2 1 0 0
          O5_BA1_IN7          87.157(0)         1 1 0 0     1 0 0 0
          O5_BA1_IN7         139.272(3)         1 1 0 0     1 0 1 0
          O5_BA1_IN7          31.017(2)         1 1 0 0     1 1 0 0
          O5_BA1_O6          115.599(2)         1 1 1 0     1 0 0 0
          O5_BA1_O6           56.420(1)         1 1 1 0     1 0 1 0
          O5_BA1_O6          115.599(2)         1 1 1 0     2 0 0 0
          O5_BA1_O6           56.420(1)         1 1 1 0     2 1 0 0
          O5_BA1_IN7         139.272(3)         1 1 1 0     1 0 0 0
          O5_BA1_IN7          87.157(0)         1 1 1 0     1 0 1 0
          O5_BA1_IN7          87.157(0)         1 1 1 0     1 1 0 0
          O6_BA1_O6           88.715(6)         1 0 0 0     1 0 1 0
          O6_BA1_O6           59.255(3)         1 0 0 0     2 0 0 0
          O6_BA1_O6           59.255(3)         1 0 0 0     2 1 0 0
          O6_BA1_IN7          34.959(1)         1 0 0 0     1 0 0 0
          O6_BA1_IN7          88.947(5)         1 0 0 0     1 0 1 0
          O6_BA1_IN7          34.959(1)         1 0 0 0     1 1 0 0
          O6_BA1_O6           59.255(3)         1 0 1 0     2 0 0 0
          O6_BA1_O6           59.255(3)         1 0 1 0     2 1 0 0
          O6_BA1_IN7          88.947(5)         1 0 1 0     1 0 0 0
          O6_BA1_IN7          34.959(1)         1 0 1 0     1 0 1 0
          O6_BA1_IN7          88.947(5)         1 0 1 0     1 1 0 0
          O6_BA1_O6           88.715(6)         2 0 0 0     2 1 0 0
          O6_BA1_IN7          34.959(1)         2 0 0 0     1 0 0 0
          O6_BA1_IN7          34.959(1)         2 0 0 0     1 0 1 0
          O6_BA1_IN7          88.947(5)         2 0 0 0     1 1 0 0
          O6_BA1_IN7          88.947(5)         2 1 0 0     1 0 0 0
          O6_BA1_IN7          88.947(5)         2 1 0 0     1 0 1 0
          O6_BA1_IN7          34.959(1)         2 1 0 0     1 1 0 0
         IN7_BA1_IN7          69.917(3)         1 0 0 0     1 0 1 0
         IN7_BA1_IN7          69.917(3)         1 0 0 0     1 1 0 0
         IN7_BA1_IN7         108.255(5)         1 0 1 0     1 1 0 0
1ba3cu3insc3o12                                                     DISAGL   Version MS-DOS 2000-10-12T13:05:51  Page  28


       Vector         Length           Optr Cell        Neighbor atom coordinates
      IN2_BA1         3.55648(15)        1-1-1 0     -.50000   -.50000    .23897
      IN2_BA1         3.55648(15)        1-1 0 0     -.50000    .50000    .23897
      IN2_BA1         3.55648(15)        1 0-1 0      .50000   -.50000    .23897
      IN2_BA1         3.55648(15)        1 0 0 0      .50000    .50000    .23897
      IN2_BA1         3.55648(15)       -1 0 0 0     -.50000   -.50000   -.23897
      IN2_BA1         3.55648(15)       -1 0 1 0     -.50000    .50000   -.23897
      IN2_BA1         3.55648(15)       -1 1 0 0      .50000   -.50000   -.23897
      IN2_BA1         3.55648(15)       -1 1 1 0      .50000    .50000   -.23897
      IN2_O4          2.09694(10)        1-1 0 0     -.50000    .00000    .00000
      IN2_O4          2.09694(10)        1 0 0 0      .50000    .00000    .00000
      IN2_O4          2.09694(10)        2 0-1 0      .00000   -.50000    .00000
      IN2_O4          2.09694(10)        2 0 0 0      .00000    .50000    .00000
      IN2_O5          2.21515(19)        1 0 0 0      .00000    .00000    .26963
      IN2_O5          2.21515(19)       -1 0 0 0      .00000    .00000   -.26963

            Angle             Degrees         atom 1 loc  atom 3 loc
         BA1_IN2_BA1          72.259(3)         1-1-1 0     1-1 0 0
         BA1_IN2_BA1          72.259(3)         1-1-1 0     1 0-1 0
         BA1_IN2_BA1         112.989(5)         1-1-1 0     1 0 0 0
         BA1_IN2_BA1          67.011(5)         1-1-1 0    -1 0 0 0
         BA1_IN2_BA1         107.741(3)         1-1-1 0    -1 0 1 0
         BA1_IN2_BA1         107.741(3)         1-1-1 0    -1 1 0 0
         BA1_IN2_BA1         180.000(0)         1-1-1 0    -1 1 1 0
         BA1_IN2_O4           53.871(1)         1-1-1 0     1-1 0 0
         BA1_IN2_O4          126.129(1)         1-1-1 0     1 0 0 0
         BA1_IN2_O4           53.871(1)         1-1-1 0     2 0-1 0
         BA1_IN2_O4          126.129(1)         1-1-1 0     2 0 0 0
         BA1_IN2_O5           56.495(3)         1-1-1 0     1 0 0 0
         BA1_IN2_O5          123.505(3)         1-1-1 0    -1 0 0 0
         BA1_IN2_BA1         112.989(5)         1-1 0 0     1 0-1 0
         BA1_IN2_BA1          72.259(3)         1-1 0 0     1 0 0 0
         BA1_IN2_BA1         107.741(3)         1-1 0 0    -1 0 0 0
         BA1_IN2_BA1          67.011(5)         1-1 0 0    -1 0 1 0
         BA1_IN2_BA1         180.000(0)         1-1 0 0    -1 1 0 0
         BA1_IN2_BA1         107.741(3)         1-1 0 0    -1 1 1 0
         BA1_IN2_O4           53.871(1)         1-1 0 0     1-1 0 0
         BA1_IN2_O4          126.129(1)         1-1 0 0     1 0 0 0
         BA1_IN2_O4          126.129(1)         1-1 0 0     2 0-1 0
         BA1_IN2_O4           53.871(1)         1-1 0 0     2 0 0 0
         BA1_IN2_O5           56.495(3)         1-1 0 0     1 0 0 0
         BA1_IN2_O5          123.505(3)         1-1 0 0    -1 0 0 0
         BA1_IN2_BA1          72.259(3)         1 0-1 0     1 0 0 0
         BA1_IN2_BA1         107.741(3)         1 0-1 0    -1 0 0 0
         BA1_IN2_BA1         180.000(0)         1 0-1 0    -1 0 1 0
         BA1_IN2_BA1          67.011(5)         1 0-1 0    -1 1 0 0
         BA1_IN2_BA1         107.741(3)         1 0-1 0    -1 1 1 0
         BA1_IN2_O4          126.129(1)         1 0-1 0     1-1 0 0
         BA1_IN2_O4           53.871(1)         1 0-1 0     1 0 0 0
         BA1_IN2_O4           53.871(1)         1 0-1 0     2 0-1 0
         BA1_IN2_O4          126.129(1)         1 0-1 0     2 0 0 0
         BA1_IN2_O5           56.495(3)         1 0-1 0     1 0 0 0
         BA1_IN2_O5          123.505(3)         1 0-1 0    -1 0 0 0
         BA1_IN2_BA1         179.980(0)         1 0 0 0    -1 0 0 0
         BA1_IN2_BA1         107.741(3)         1 0 0 0    -1 0 1 0
         BA1_IN2_BA1         107.741(3)         1 0 0 0    -1 1 0 0
         BA1_IN2_BA1          67.011(5)         1 0 0 0    -1 1 1 0
         BA1_IN2_O4          126.129(1)         1 0 0 0     1-1 0 0
1ba3cu3insc3o12                                                     DISAGL   Version MS-DOS 2000-10-12T13:05:51  Page  29


            Angle             Degrees         atom 1 loc  atom 3 loc
         BA1_IN2_O4           53.871(1)         1 0 0 0     1 0 0 0
         BA1_IN2_O4          126.129(1)         1 0 0 0     2 0-1 0
         BA1_IN2_O4           53.871(1)         1 0 0 0     2 0 0 0
         BA1_IN2_O5           56.495(3)         1 0 0 0     1 0 0 0
         BA1_IN2_O5          123.505(3)         1 0 0 0    -1 0 0 0
         BA1_IN2_BA1          72.259(3)        -1 0 0 0    -1 0 1 0
         BA1_IN2_BA1          72.259(3)        -1 0 0 0    -1 1 0 0
         BA1_IN2_BA1         112.989(5)        -1 0 0 0    -1 1 1 0
         BA1_IN2_O4           53.871(1)        -1 0 0 0     1-1 0 0
         BA1_IN2_O4          126.129(1)        -1 0 0 0     1 0 0 0
         BA1_IN2_O4           53.871(1)        -1 0 0 0     2 0-1 0
         BA1_IN2_O4          126.129(1)        -1 0 0 0     2 0 0 0
         BA1_IN2_O5          123.505(3)        -1 0 0 0     1 0 0 0
         BA1_IN2_O5           56.495(3)        -1 0 0 0    -1 0 0 0
         BA1_IN2_BA1         112.989(5)        -1 0 1 0    -1 1 0 0
         BA1_IN2_BA1          72.259(3)        -1 0 1 0    -1 1 1 0
         BA1_IN2_O4           53.871(1)        -1 0 1 0     1-1 0 0
         BA1_IN2_O4          126.129(1)        -1 0 1 0     1 0 0 0
         BA1_IN2_O4          126.129(1)        -1 0 1 0     2 0-1 0
         BA1_IN2_O4           53.871(1)        -1 0 1 0     2 0 0 0
         BA1_IN2_O5          123.505(3)        -1 0 1 0     1 0 0 0
         BA1_IN2_O5           56.495(3)        -1 0 1 0    -1 0 0 0
         BA1_IN2_BA1          72.259(3)        -1 1 0 0    -1 1 1 0
         BA1_IN2_O4          126.129(1)        -1 1 0 0     1-1 0 0
         BA1_IN2_O4           53.871(1)        -1 1 0 0     1 0 0 0
         BA1_IN2_O4           53.871(1)        -1 1 0 0     2 0-1 0
         BA1_IN2_O4          126.129(1)        -1 1 0 0     2 0 0 0
         BA1_IN2_O5          123.505(3)        -1 1 0 0     1 0 0 0
         BA1_IN2_O5           56.495(3)        -1 1 0 0    -1 0 0 0
         BA1_IN2_O4          126.129(1)        -1 1 1 0     1-1 0 0
         BA1_IN2_O4           53.871(1)        -1 1 1 0     1 0 0 0
         BA1_IN2_O4          126.129(1)        -1 1 1 0     2 0-1 0
         BA1_IN2_O4           53.871(1)        -1 1 1 0     2 0 0 0
         BA1_IN2_O5          123.505(3)        -1 1 1 0     1 0 0 0
         BA1_IN2_O5           56.495(3)        -1 1 1 0    -1 0 0 0
          O4_IN2_O4          180.000(0)         1-1 0 0     1 0 0 0
          O4_IN2_O4           90.000(0)         1-1 0 0     2 0-1 0
          O4_IN2_O4           90.000(0)         1-1 0 0     2 0 0 0
          O4_IN2_O5           90.000(0)         1-1 0 0     1 0 0 0
          O4_IN2_O5           90.000(0)         1-1 0 0    -1 0 0 0
          O4_IN2_O4           90.000(0)         1 0 0 0     2 0-1 0
          O4_IN2_O4           90.000(0)         1 0 0 0     2 0 0 0
          O4_IN2_O5           90.000(0)         1 0 0 0     1 0 0 0
          O4_IN2_O5           90.000(0)         1 0 0 0    -1 0 0 0
          O4_IN2_O4          180.000(0)         2 0-1 0     2 0 0 0
          O4_IN2_O5           90.000(0)         2 0-1 0     1 0 0 0
          O4_IN2_O5           90.000(0)         2 0-1 0    -1 0 0 0
          O4_IN2_O5           90.000(0)         2 0 0 0     1 0 0 0
          O4_IN2_O5           90.000(0)         2 0 0 0    -1 0 0 0
          O5_IN2_O5          180.000(0)         1 0 0 0    -1 0 0 0

       Vector         Length           Optr Cell        Neighbor atom coordinates
      CU3_BA1         3.65968(16)        1-1-1 0     -.50000   -.50000    .23897
      CU3_BA1         3.65968(16)        1-1 0 0     -.50000    .50000    .23897
      CU3_BA1         3.65968(16)        1 0-1 0      .50000   -.50000    .23897
      CU3_BA1         3.65968(16)        1 0 0 0      .50000    .50000    .23897
1ba3cu3insc3o12                                                     DISAGL   Version MS-DOS 2000-10-12T13:05:51  Page  30


       Vector         Length           Optr Cell        Neighbor atom coordinates
      CU3_BA1         3.65968(16)       -1 0 0 1     -.50000   -.50000    .76103
      CU3_BA1         3.65968(16)       -1 0 1 1     -.50000    .50000    .76103
      CU3_BA1         3.65968(16)       -1 1 0 1      .50000   -.50000    .76103
      CU3_BA1         3.65968(16)       -1 1 1 1      .50000    .50000    .76103
      CU3_O5          1.89259(16)        1 0 0 0      .00000    .00000    .26963
      CU3_O5          1.89259(16)       -1 0 0 1      .00000    .00000    .73037
      CU3_O6          2.09694(10)        1-1 0 0     -.50000    .00000    .50000
      CU3_O6          2.09694(10)        1 0 0 0      .50000    .00000    .50000
      CU3_O6          2.09694(10)        2 0-1 0      .00000   -.50000    .50000
      CU3_O6          2.09694(10)        2 0 0 0      .00000    .50000    .50000

            Angle             Degrees         atom 1 loc  atom 3 loc
          O5_CU3_O5          180.000(0)         1 0 0 0    -1 0 0 1
          O5_CU3_O6           90.000(0)         1 0 0 0     1-1 0 0
          O5_CU3_O6           90.000(0)         1 0 0 0     1 0 0 0
          O5_CU3_O6           90.000(0)         1 0 0 0     2 0-1 0
          O5_CU3_O6           90.000(0)         1 0 0 0     2 0 0 0
          O5_CU3_O6           90.000(0)        -1 0 0 1     1-1 0 0
          O5_CU3_O6           90.000(0)        -1 0 0 1     1 0 0 0
          O5_CU3_O6           90.000(0)        -1 0 0 1     2 0-1 0
          O5_CU3_O6           90.000(0)        -1 0 0 1     2 0 0 0
          O6_CU3_O6          180.000(0)         1-1 0 0     1 0 0 0
          O6_CU3_O6           90.000(0)         1-1 0 0     2 0-1 0
          O6_CU3_O6           90.000(0)         1-1 0 0     2 0 0 0
          O6_CU3_O6           90.000(0)         1 0 0 0     2 0-1 0
          O6_CU3_O6           90.000(0)         1 0 0 0     2 0 0 0
          O6_CU3_O6          180.000(0)         2 0-1 0     2 0 0 0

       Vector         Length           Optr Cell        Neighbor atom coordinates
       O4_BA1         2.87253(14)        1 0-1 0      .50000   -.50000    .23897
       O4_BA1         2.87253(14)        1 0 0 0      .50000    .50000    .23897
       O4_BA1         2.87253(14)       -1 1 0 0      .50000   -.50000   -.23897
       O4_BA1         2.87253(14)       -1 1 1 0      .50000    .50000   -.23897
       O4_IN2         2.09694(10)        1 0 0 0      .00000    .00000    .00000
       O4_IN2         2.09694(10)        1 1 0 0     1.00000    .00000    .00000

            Angle             Degrees         atom 1 loc  atom 3 loc
         BA1_O4_BA1           93.772(6)         1 0-1 0     1 0 0 0
         BA1_O4_BA1           86.228(6)         1 0-1 0    -1 1 0 0
         BA1_O4_BA1          180.000(0)         1 0-1 0    -1 1 1 0
         BA1_O4_IN2           90.000(0)         1 0-1 0     1 0 0 0
         BA1_O4_IN2           90.000(0)         1 0-1 0     1 1 0 0
         BA1_O4_BA1          180.000(0)         1 0 0 0    -1 1 0 0
         BA1_O4_BA1           86.228(6)         1 0 0 0    -1 1 1 0
         BA1_O4_IN2           90.000(0)         1 0 0 0     1 0 0 0
         BA1_O4_IN2           90.000(0)         1 0 0 0     1 1 0 0
         BA1_O4_BA1           93.772(6)        -1 1 0 0    -1 1 1 0
         BA1_O4_IN2           90.000(0)        -1 1 0 0     1 0 0 0
         BA1_O4_IN2           90.000(0)        -1 1 0 0     1 1 0 0
         BA1_O4_IN2           90.000(0)        -1 1 1 0     1 0 0 0
         BA1_O4_IN2           90.000(0)        -1 1 1 0     1 1 0 0
         IN2_O4_IN2          180.000(0)         1 0 0 0     1 1 0 0

       Vector         Length           Optr Cell        Neighbor atom coordinates
       O5_BA1         2.97620(14)        1-1-1 0     -.50000   -.50000    .23897
       O5_BA1         2.97620(14)        1-1 0 0     -.50000    .50000    .23897
1ba3cu3insc3o12                                                     DISAGL   Version MS-DOS 2000-10-12T13:05:51  Page  31


       Vector         Length           Optr Cell        Neighbor atom coordinates
       O5_BA1         2.97620(14)        1 0-1 0      .50000   -.50000    .23897
       O5_BA1         2.97620(14)        1 0 0 0      .50000    .50000    .23897
       O5_IN2         2.21515(19)        1 0 0 0      .00000    .00000    .00000
       O5_CU3         1.89259(16)        1 0 0 0      .00000    .00000    .50000
       O5_IN7         1.89259(16)        1 0 0 0      .00000    .00000    .50000

            Angle             Degrees         atom 1 loc  atom 3 loc
         BA1_O5_BA1           89.589(0)         1-1-1 0     1-1 0 0
         BA1_O5_BA1           89.589(0)         1-1-1 0     1 0-1 0
         BA1_O5_BA1          170.289(1)         1-1-1 0     1 0 0 0
         BA1_O5_IN2           85.144(0)         1-1-1 0     1 0 0 0
         BA1_O5_CU3           94.856(0)         1-1-1 0     1 0 0 0
         BA1_O5_IN7           94.856(0)         1-1-1 0     1 0 0 0
         BA1_O5_BA1          170.289(1)         1-1 0 0     1 0-1 0
         BA1_O5_BA1           89.589(0)         1-1 0 0     1 0 0 0
         BA1_O5_IN2           85.144(0)         1-1 0 0     1 0 0 0
         BA1_O5_CU3           94.856(0)         1-1 0 0     1 0 0 0
         BA1_O5_IN7           94.856(0)         1-1 0 0     1 0 0 0
         BA1_O5_BA1           89.589(0)         1 0-1 0     1 0 0 0
         BA1_O5_IN2           85.144(0)         1 0-1 0     1 0 0 0
         BA1_O5_CU3           94.856(0)         1 0-1 0     1 0 0 0
         BA1_O5_IN7           94.856(0)         1 0-1 0     1 0 0 0
         BA1_O5_IN2           85.144(0)         1 0 0 0     1 0 0 0
         BA1_O5_CU3           94.856(0)         1 0 0 0     1 0 0 0
         BA1_O5_IN7           94.856(0)         1 0 0 0     1 0 0 0
         IN2_O5_CU3          180.000(0)         1 0 0 0     1 0 0 0
         IN2_O5_IN7          180.000(0)         1 0 0 0     1 0 0 0
         CU3_O5_IN7             .000(0)         1 0 0 0     1 0 0 0

       Vector         Length           Optr Cell        Neighbor atom coordinates
       O6_BA1         2.99935(15)        1 0-1 0      .50000   -.50000    .23897
       O6_BA1         2.99935(15)        1 0 0 0      .50000    .50000    .23897
       O6_BA1         2.99935(15)       -1 1 0 1      .50000   -.50000    .76103
       O6_BA1         2.99935(15)       -1 1 1 1      .50000    .50000    .76103
       O6_CU3         2.09694(10)        1 0 0 0      .00000    .00000    .50000
       O6_CU3         2.09694(10)        1 1 0 0     1.00000    .00000    .50000
       O6_IN7         2.09694(10)        1 0 0 0      .00000    .00000    .50000
       O6_IN7         2.09694(10)        1 1 0 0     1.00000    .00000    .50000

            Angle             Degrees         atom 1 loc  atom 3 loc
         BA1_O6_BA1           88.715(6)         1 0-1 0     1 0 0 0
         BA1_O6_BA1           91.285(6)         1 0-1 0    -1 1 0 1
         BA1_O6_BA1          179.966(0)         1 0-1 0    -1 1 1 1
         BA1_O6_CU3           90.000(0)         1 0-1 0     1 0 0 0
         BA1_O6_CU3           90.000(0)         1 0-1 0     1 1 0 0
         BA1_O6_IN7           90.000(0)         1 0-1 0     1 0 0 0
         BA1_O6_IN7           90.000(0)         1 0-1 0     1 1 0 0
         BA1_O6_BA1          179.966(0)         1 0 0 0    -1 1 0 1
         BA1_O6_BA1           91.285(6)         1 0 0 0    -1 1 1 1
         BA1_O6_CU3           90.000(0)         1 0 0 0     1 0 0 0
         BA1_O6_CU3           90.000(0)         1 0 0 0     1 1 0 0
         BA1_O6_IN7           90.000(0)         1 0 0 0     1 0 0 0
         BA1_O6_IN7           90.000(0)         1 0 0 0     1 1 0 0
         BA1_O6_BA1           88.715(6)        -1 1 0 1    -1 1 1 1
         BA1_O6_CU3           90.000(0)        -1 1 0 1     1 0 0 0
         BA1_O6_CU3           90.000(0)        -1 1 0 1     1 1 0 0
1ba3cu3insc3o12                                                     DISAGL   Version MS-DOS 2000-10-12T13:05:51  Page  32


            Angle             Degrees         atom 1 loc  atom 3 loc
         BA1_O6_IN7           90.000(0)        -1 1 0 1     1 0 0 0
         BA1_O6_IN7           90.000(0)        -1 1 0 1     1 1 0 0
         BA1_O6_CU3           90.000(0)        -1 1 1 1     1 0 0 0
         BA1_O6_CU3           90.000(0)        -1 1 1 1     1 1 0 0
         BA1_O6_IN7           90.000(0)        -1 1 1 1     1 0 0 0
         BA1_O6_IN7           90.000(0)        -1 1 1 1     1 1 0 0
         CU3_O6_CU3          180.000(0)         1 0 0 0     1 1 0 0
         CU3_O6_IN7             .000(0)         1 0 0 0     1 0 0 0
         CU3_O6_IN7          180.000(0)         1 0 0 0     1 1 0 0
         CU3_O6_IN7          180.000(0)         1 1 0 0     1 0 0 0
         CU3_O6_IN7             .000(0)         1 1 0 0     1 1 0 0
         IN7_O6_IN7          180.000(0)         1 0 0 0     1 1 0 0

       Vector         Length           Optr Cell        Neighbor atom coordinates
      IN7_BA1         3.65968(16)        1-1-1 0     -.50000   -.50000    .23897
      IN7_BA1         3.65968(16)        1-1 0 0     -.50000    .50000    .23897
      IN7_BA1         3.65968(16)        1 0-1 0      .50000   -.50000    .23897
      IN7_BA1         3.65968(16)        1 0 0 0      .50000    .50000    .23897
      IN7_BA1         3.65968(16)       -1 0 0 1     -.50000   -.50000    .76103
      IN7_BA1         3.65968(16)       -1 0 1 1     -.50000    .50000    .76103
      IN7_BA1         3.65968(16)       -1 1 0 1      .50000   -.50000    .76103
      IN7_BA1         3.65968(16)       -1 1 1 1      .50000    .50000    .76103
      IN7_O5          1.89259(16)        1 0 0 0      .00000    .00000    .26963
      IN7_O5          1.89259(16)       -1 0 0 1      .00000    .00000    .73037
      IN7_O6          2.09694(10)        1-1 0 0     -.50000    .00000    .50000
      IN7_O6          2.09694(10)        1 0 0 0      .50000    .00000    .50000
      IN7_O6          2.09694(10)        2 0-1 0      .00000   -.50000    .50000
      IN7_O6          2.09694(10)        2 0 0 0      .00000    .50000    .50000

            Angle             Degrees         atom 1 loc  atom 3 loc
         BA1_IN7_BA1          69.917(3)         1-1-1 0     1-1 0 0
         BA1_IN7_BA1          69.917(3)         1-1-1 0     1 0-1 0
         BA1_IN7_BA1         108.255(5)         1-1-1 0     1 0 0 0
         BA1_IN7_BA1          71.745(5)         1-1-1 0    -1 0 0 1
         BA1_IN7_BA1         110.083(3)         1-1-1 0    -1 0 1 1
         BA1_IN7_BA1         110.083(3)         1-1-1 0    -1 1 0 1
         BA1_IN7_BA1         179.980(0)         1-1-1 0    -1 1 1 1
         BA1_IN7_O5           54.127(3)         1-1-1 0     1 0 0 0
         BA1_IN7_O5          125.873(3)         1-1-1 0    -1 0 0 1
         BA1_IN7_O6           55.041(1)         1-1-1 0     1-1 0 0
         BA1_IN7_O6          124.959(1)         1-1-1 0     1 0 0 0
         BA1_IN7_O6           55.041(1)         1-1-1 0     2 0-1 0
         BA1_IN7_O6          124.959(1)         1-1-1 0     2 0 0 0
         BA1_IN7_BA1         108.255(5)         1-1 0 0     1 0-1 0
         BA1_IN7_BA1          69.917(3)         1-1 0 0     1 0 0 0
         BA1_IN7_BA1         110.083(3)         1-1 0 0    -1 0 0 1
         BA1_IN7_BA1          71.745(5)         1-1 0 0    -1 0 1 1
         BA1_IN7_BA1         180.000(0)         1-1 0 0    -1 1 0 1
         BA1_IN7_BA1         110.083(3)         1-1 0 0    -1 1 1 1
         BA1_IN7_O5           54.127(3)         1-1 0 0     1 0 0 0
         BA1_IN7_O5          125.873(3)         1-1 0 0    -1 0 0 1
         BA1_IN7_O6           55.041(1)         1-1 0 0     1-1 0 0
         BA1_IN7_O6          124.959(1)         1-1 0 0     1 0 0 0
         BA1_IN7_O6          124.959(1)         1-1 0 0     2 0-1 0
         BA1_IN7_O6           55.041(1)         1-1 0 0     2 0 0 0
         BA1_IN7_BA1          69.917(3)         1 0-1 0     1 0 0 0
1ba3cu3insc3o12                                                     DISAGL   Version MS-DOS 2000-10-12T13:05:51  Page  33


            Angle             Degrees         atom 1 loc  atom 3 loc
         BA1_IN7_BA1         110.083(3)         1 0-1 0    -1 0 0 1
         BA1_IN7_BA1         180.000(0)         1 0-1 0    -1 0 1 1
         BA1_IN7_BA1          71.745(5)         1 0-1 0    -1 1 0 1
         BA1_IN7_BA1         110.083(3)         1 0-1 0    -1 1 1 1
         BA1_IN7_O5           54.127(3)         1 0-1 0     1 0 0 0
         BA1_IN7_O5          125.873(3)         1 0-1 0    -1 0 0 1
         BA1_IN7_O6          124.959(1)         1 0-1 0     1-1 0 0
         BA1_IN7_O6           55.041(1)         1 0-1 0     1 0 0 0
         BA1_IN7_O6           55.041(1)         1 0-1 0     2 0-1 0
         BA1_IN7_O6          124.959(1)         1 0-1 0     2 0 0 0
         BA1_IN7_BA1         180.000(0)         1 0 0 0    -1 0 0 1
         BA1_IN7_BA1         110.083(3)         1 0 0 0    -1 0 1 1
         BA1_IN7_BA1         110.083(3)         1 0 0 0    -1 1 0 1
         BA1_IN7_BA1          71.745(5)         1 0 0 0    -1 1 1 1
         BA1_IN7_O5           54.127(3)         1 0 0 0     1 0 0 0
         BA1_IN7_O5          125.873(3)         1 0 0 0    -1 0 0 1
         BA1_IN7_O6          124.959(1)         1 0 0 0     1-1 0 0
         BA1_IN7_O6           55.041(1)         1 0 0 0     1 0 0 0
         BA1_IN7_O6          124.959(1)         1 0 0 0     2 0-1 0
         BA1_IN7_O6           55.041(1)         1 0 0 0     2 0 0 0
         BA1_IN7_BA1          69.917(3)        -1 0 0 1    -1 0 1 1
         BA1_IN7_BA1          69.917(3)        -1 0 0 1    -1 1 0 1
         BA1_IN7_BA1         108.255(5)        -1 0 0 1    -1 1 1 1
         BA1_IN7_O5          125.873(3)        -1 0 0 1     1 0 0 0
         BA1_IN7_O5           54.127(3)        -1 0 0 1    -1 0 0 1
         BA1_IN7_O6           55.041(1)        -1 0 0 1     1-1 0 0
         BA1_IN7_O6          124.959(1)        -1 0 0 1     1 0 0 0
         BA1_IN7_O6           55.041(1)        -1 0 0 1     2 0-1 0
         BA1_IN7_O6          124.959(1)        -1 0 0 1     2 0 0 0
         BA1_IN7_BA1         108.255(5)        -1 0 1 1    -1 1 0 1
         BA1_IN7_BA1          69.917(3)        -1 0 1 1    -1 1 1 1
         BA1_IN7_O5          125.873(3)        -1 0 1 1     1 0 0 0
         BA1_IN7_O5           54.127(3)        -1 0 1 1    -1 0 0 1
         BA1_IN7_O6           55.041(1)        -1 0 1 1     1-1 0 0
         BA1_IN7_O6          124.959(1)        -1 0 1 1     1 0 0 0
         BA1_IN7_O6          124.959(1)        -1 0 1 1     2 0-1 0
         BA1_IN7_O6           55.041(1)        -1 0 1 1     2 0 0 0
         BA1_IN7_BA1          69.917(3)        -1 1 0 1    -1 1 1 1
         BA1_IN7_O5          125.873(3)        -1 1 0 1     1 0 0 0
         BA1_IN7_O5           54.127(3)        -1 1 0 1    -1 0 0 1
         BA1_IN7_O6          124.959(1)        -1 1 0 1     1-1 0 0
         BA1_IN7_O6           55.041(1)        -1 1 0 1     1 0 0 0
         BA1_IN7_O6           55.041(1)        -1 1 0 1     2 0-1 0
         BA1_IN7_O6          124.959(1)        -1 1 0 1     2 0 0 0
         BA1_IN7_O5          125.873(3)        -1 1 1 1     1 0 0 0
         BA1_IN7_O5           54.127(3)        -1 1 1 1    -1 0 0 1
         BA1_IN7_O6          124.959(1)        -1 1 1 1     1-1 0 0
         BA1_IN7_O6           55.041(1)        -1 1 1 1     1 0 0 0
         BA1_IN7_O6          124.959(1)        -1 1 1 1     2 0-1 0
         BA1_IN7_O6           55.041(1)        -1 1 1 1     2 0 0 0
          O5_IN7_O5          180.000(0)         1 0 0 0    -1 0 0 1
          O5_IN7_O6           90.000(0)         1 0 0 0     1-1 0 0
          O5_IN7_O6           90.000(0)         1 0 0 0     1 0 0 0
          O5_IN7_O6           90.000(0)         1 0 0 0     2 0-1 0
          O5_IN7_O6           90.000(0)         1 0 0 0     2 0 0 0
          O5_IN7_O6           90.000(0)        -1 0 0 1     1-1 0 0
1ba3cu3insc3o12                                                     DISAGL   Version MS-DOS 2000-10-12T13:05:51  Page  34


            Angle             Degrees         atom 1 loc  atom 3 loc
          O5_IN7_O6           90.000(0)        -1 0 0 1     1 0 0 0
          O5_IN7_O6           90.000(0)        -1 0 0 1     2 0-1 0
          O5_IN7_O6           90.000(0)        -1 0 0 1     2 0 0 0
          O6_IN7_O6          180.000(0)         1-1 0 0     1 0 0 0
          O6_IN7_O6           90.000(0)         1-1 0 0     2 0-1 0
          O6_IN7_O6           90.000(0)         1-1 0 0     2 0 0 0
          O6_IN7_O6           90.000(0)         1 0 0 0     2 0-1 0
          O6_IN7_O6           90.000(0)         1 0 0 0     2 0 0 0
          O6_IN7_O6          180.000(0)         2 0-1 0     2 0 0 0
1ba3cu3insc3o12                                                     DISAGL   Version MS-DOS 2000-10-12T13:05:51  Page  35


 Space group F m 3 m             
 The lattice is centric  F-centered cubic         Laue symmetry m3m   
  Multiplicity of a general site is 192
  The symmetry of the point 0,0,0 contains 1bar

 The equivalent positions are:

 ( 1)     X      Y      Z  ( 2)     Z      X      Y  ( 3)     Y      Z      X 
 ( 4)     X      Y     -Z  ( 5)    -Z      X      Y  ( 6)     Y     -Z      X 
 ( 7)    -Z      X     -Y  ( 8)    -Y     -Z      X  ( 9)     Y     -Z     -X 
 (10)    -X      Y     -Z  (11)    -Z     -X      Y  (12)     X     -Y     -Z 
 (13)     Y      X      Z  (14)     Z      Y      X  (15)     X      Z      Y 
 (16)     Y      X     -Z  (17)    -Z      Y      X  (18)     X     -Z      Y 
 (19)    -Z      Y     -X  (20)    -X     -Z      Y  (21)     X     -Z     -Y 
 (22)    -Y      X     -Z  (23)    -Z     -Y      X  (24)     Y     -X     -Z 
 
 GENLES was run on 2000-10-10T13:14:22     Total cycles run1219   

 The Current Least-Squares controls are

 Maximum number of cycles is    6
 I/SigI cut-off is  1.00
 
 The atom type radii are

 TYPE     BOND      ANGLE
 BA       2.44000   2.24000
 CU       1.48000   1.28000
 IN       1.86000   1.66000
 SC       1.84000   1.64000
 O        1.09000    .89000
 AL       1.60000   1.43000

 Lattice constants are    4.05064   4.05064   4.05064  .00000  .00000  .00000
   Standard deviations     .00053    .00053    .00053  .00000  .00000  .00000

 DMAX is    3.72000 DAGL is    3.32000 and IAGL is     0

 The atoms read in are
  AL1       .0000000(0)   .0000000(0)   .0000000(0)    M3M    AL      1 1.000(0)
1ba3cu3insc3o12                                                     DISAGL   Version MS-DOS 2000-10-12T13:05:51  Page  36


       Vector         Length           Optr Cell        Neighbor atom coordinates
      AL1_AL1         2.86423(26)      101 0-1-1      .00000   -.50000   -.50000
      AL1_AL1         2.86423(26)      101 0-1 0      .00000    .50000    .50000
      AL1_AL1         2.86423(26)      101 0 0-1      .00000    .50000   -.50000
      AL1_AL1         2.86423(26)      101 0 0 0      .00000    .50000    .50000
      AL1_AL1         2.86423(26)      201-1 0-1     -.50000    .00000   -.50000
      AL1_AL1         2.86423(26)      201-1 0 0     -.50000    .00000    .50000
      AL1_AL1         2.86423(26)      201 0 0-1      .50000    .00000   -.50000
      AL1_AL1         2.86423(26)      201 0 0 0      .50000    .00000    .50000
      AL1_AL1         2.8642(4)        301-1-1 0     -.50000   -.50000    .00000
      AL1_AL1         2.8642(4)        301-1 0 0     -.50000    .50000    .00000
      AL1_AL1         2.8642(4)        301 0-1 0      .50000   -.50000    .00000
      AL1_AL1         2.8642(4)        301 0 0 0      .50000    .50000    .00000
Supplementary Material (ESI) for Journal of Materials Chemistry
This journal is (c) The Royal Society of Chemistry 2001
