# Supplementary material for: Synthesis, stoichiometry and structure of the quaternary scandium cuprate Ba3Cu3Sc4O12 and of 334-phase solid solution members Ba3Cu3Sc4 − xInxO12 (0 ≤ x ≤ 4)
Source: Royal Society of Chemistry journal article supplement (doi:10.1039/b008787o), 2001-01-01
Supplement: in3sclst.doc [file in3sclst.doc]

1ba3cu3insc3o12                                                              Version        2000-10-10T13:14:11  Page   1


           |---------------------------------------------------------|
           |              Program POWPREF Version MS-DOS             |
           | Prepares powder histograms for least-squares refinement |
           |         Distributed on 15/ 7/1999; 0:31:36              |
           |---------------------------------------------------------|

        |---------------------------------------------------------------|
        |            Allen C. Larson and Robert B. Von Dreele           |
        |      Manuel Lujan, Jr. Neutron Scattering Center, MS-H805     |
        |      Los Alamos National Laboratory, Los Alamos, NM  87545    |
        |                                                               |
        | Copyright, 1999, The Regents of the University of California. |
        |---------------------------------------------------------------|
 
 The last history record is :
     HSTRY827 GENLES  MS-DOS 2000-10-10T09:30:15  Sdsq=  .891E+04 S/E=  .930E-02 
 Data for bank  1 read from file in3sc.dat
 The powder pattern has  5739 channels with   1 bins per channel
 No fixed background points for this powder pattern
 The  2 excluded regions are (in deg):
 Exclude    from:       to:     from:       to:     from:       to:     from:       to:   
            .0000     .0000  120.0000 1000.0000
 Incident spectrum type  0 can be used in the region     .000 deg to  180.000 deg
 The minimum possible weighted residual for this histogram is    .0357
 Histogram no.  1 on file IN3SC.P01
 updated with new excluded regions, background and incident spectrum data.
 CPU time =    .05 to update histogram
 Lattice parameters for phase 1 are:
  a,b,c  = 12.071940 12.071940  8.485569  angles =    90.000    90.000    90.000
  volume =  1236.617
 Lattice parameters for phase 2 are:
  a,b,c  =  4.193875  4.193875  8.215494  angles =    90.000    90.000    90.000
  volume =   144.499
 Lattice parameters for phase 3 are:
  a,b,c  =  4.050637  4.050637  4.050637  angles =    90.000    90.000    90.000
  volume =    66.461
 Profile function 3 for phase no. 1 has the coefficients p1-p19:
     .634371E+03   -.167466E+03    .235509E+02    .231196E+02
     .772093E+01    .127889E+01    .500000E-03    .500000E-03
    -.529301E+01    .185004E+00    .000000E+00   -.271499E+01
     .000000E+00    .000000E+00    .000000E+00    .000000E+00
     .000000E+00    .000000E+00    .000000E+00
 cutoff on the wings at  .010 of maximum

 Profile function 3 for phase no. 2 has the coefficients p1-p19:
     .962434E+02   -.907878E+02    .305732E+02    .117313E+02
     .135024E+01    .350637E+02    .500000E-03    .500000E-03
     .969514E+01   -.189038E+01    .200090E+02    .000000E+00
     .000000E+00    .000000E+00    .000000E+00    .000000E+00
     .000000E+00    .000000E+00    .000000E+00
 cutoff on the wings at  .010 of maximum

 Profile function 3 for phase no. 3 has the coefficients p1-p19:
     .100000E+00   -.200000E+01    .106320E+03    .000000E+00
     .000000E+00    .000000E+00    .500000E-03    .500000E-03
     .000000E+00    .000000E+00    .000000E+00    .000000E+00
     .000000E+00    .000000E+00    .000000E+00    .000000E+00
     .000000E+00    .000000E+00    .000000E+00
 cutoff on the wings at  .010 of maximum

 Minimum d-spacing used to generate reflections    .8797 for phase 1
 Minimum d-spacing used to generate reflections    .8621 for phase 2
 Minimum d-spacing used to generate reflections    .8606 for phase 3
 Minimum d-spacing used to generate reflections    .9887 for phase 1
 Minimum d-spacing used to generate reflections    .9678 for phase 2
 Minimum d-spacing used to generate reflections    .9652 for phase 3
 Minimum d-spacing for matching reflections    .8894
 Estimated number of reflections to be generated is   981
 Number of reflections generated for phase 1 is   560
 Number of reflections generated for phase 2 is   198
 Number of reflections generated for phase 3 is    16
 Total number of reflections generated for all phases is   774
 CPU time =    .06 sec. to generate reflections.
 CPU time =    .55 sec. to locate reflection limits.
 CPU time =    .11 sec. to match reflection ranges to powder pattern
 The maximum number of reflections contributing to any profile point is  105
 CPU time =    .05 sec. to update file 
1ba3cu3insc3o12                                                              Version        2000-10-10T13:14:16  Page   1


             |----------------------------------------------------|
             |            Program GENLES Version MS-DOS           |
             |    General crystal structure refinement program    |
             | Magnetic structure refinement added by M. Yethiraj |
             |   Revised and corrected by Larson and Von Dreele   |
             |      Distributed on 15/ 7/1999; 0:28:26            |
             |----------------------------------------------------|

        |---------------------------------------------------------------|
        |            Allen C. Larson and Robert B. Von Dreele           |
        |      Manuel Lujan, Jr. Neutron Scattering Center, MS-H805     |
        |      Los Alamos National Laboratory, Los Alamos, NM  87545    |
        |                                                               |
        | Copyright, 1999, The Regents of the University of California. |
        |---------------------------------------------------------------|
 
 The experiment file is: IN3SC.EXP
 The last history record is :
     HSTRY828 POWPREF MS-DOS 2000-10-10T13:14:11                                 
 Maximum number of cycles is    6
 I/SigI cut-off is  1.00
 Structure factors will be extracted from histogram  1
 using extraction method codes     0    0    0    0    0    0    0    0    0

 The atomic and magnetic scattering factors for  6 types of atoms are:
 Atom type   b-len   a(1)      b(1)      a(2)      b(2)      a(3)      b(3)      a(4)      b(4)      c
 BA           .525  20.33610   3.21600  19.29700    .27560  10.88800  20.20730   2.69590 167.20200   2.77310
 CU           .772  13.33800   3.58280   7.16760    .24700   5.61580  11.39660   1.67350  64.81260   1.19100
 IN           .406  19.16240    .54760  18.55960   6.37760   4.29480  25.84990   2.03960  92.80290   4.93910
 SC          1.230   9.18900   9.02130   7.36790    .57290   1.64090 136.10800   1.46800  51.35310   1.33290
 O            .581   3.04850  13.27710   2.28680   5.70110   1.54630    .32390    .86700  32.90890    .25080
 AL           .345   6.42020   3.03870   1.90020    .74260   1.59360  31.54720   1.96460  85.08860   1.11510
 Atom type  CrKa f'      f"   FeKa f'      f"   CuKa f'      f"   MoKa f'      f"   AgKa f'      f" 
 BA         -11.460    9.980   -4.830   12.160   -1.330    8.460    -.610    2.280    -.980    1.500
 CU           -.795    1.196   -1.129     .888   -2.019     .589     .263    1.266     .265     .826
 IN          -1.788    9.627    -.626    7.356    -.126    5.045    -.936    1.310   -1.493     .854
 SC           -.717    2.968    -.038    2.256     .285    1.533     .226     .372     .156     .235
 O             .090     .073     .069     .052     .047     .032     .008     .006     .003     .004
 AL            .318     .522     .269     .381     .204     .246     .056     .052     .032     .031

 Space group   I 4/m c m         
 The lattice is centric  I-centered tetragonal    Laue symmetry 4/mmm 
  Multiplicity of a general site is  32
  The symmetry of the point 0,0,0 contains 1bar

 The equivalent positions are:

 ( 1)     X      Y      Z  ( 2)    -Y      X      Z 
 ( 3)    -X     -Y      Z  ( 4)     Y     -X      Z 
 ( 5)    -X      Y  1/2+Z  ( 6)    -Y     -X  1/2+Z 
 ( 7)     X     -Y  1/2+Z  ( 8)     Y      X  1/2+Z 
 
1ba3cu3insc3o12                                                     GENLES   Version MS-DOS 2000-10-10T13:14:16  Page   2


 The atom positions read in are

 Type seq. At. name  mult   symm  frac   pn    X    pn    Y    pn    Z    pn  u11 pn  u22 pn  u33 pn  u12 pn  u13 pn  u23 pn
 BA      1 BA1         44/M(001) 1.0000   0  .0000   0  .0000   0  .0000   0  .6   1
 BA      2 BA2         8MM2(110) 1.0000   0  .2791   2  .7791   3  .0000   0  .3   4
 CU      3 CU3         4-42M 001 1.0000   0  .5000   0  .0000   0  .2500   0  .1   5
 CU      4 CU4         8MM2(110) 1.0000   0  .1053   6  .6053   7  .0000   0  .2   8
 IN      5 IN5        16  2(100)  .7994   9  .2425  10  .0000   0  .2500   0  .0   0
 SC      6 SC6        16  2(100)  .2006  11  .2425  12  .0000   0  .2500   0  .0   0
 O       7 O7         16  M(+-0) 1.0000   0  .1126  13  .6126  14  .2248  15  .4  16
 O       8 O8         16  2(110) 1.0000   0  .1302  17  .1302  18  .2500   0  .4  19
 O       9 O9         16  M(001) 1.0000   0  .2373  20  .5036  21  .0000   0  .4  22

 Space group   P 4/m m m         
 The lattice is centric   primitive tetragonal    Laue symmetry 4/mmm 
  Multiplicity of a general site is  16
  The symmetry of the point 0,0,0 contains 1bar

 The equivalent positions are:

 ( 1)     X      Y      Z  ( 2)    -Y      X      Z 
 ( 3)    -X     -Y      Z  ( 4)     Y     -X      Z 
 ( 5)    -X      Y      Z  ( 6)    -Y     -X      Z 
 ( 7)     X     -Y      Z  ( 8)     Y      X      Z 
 

 The atom positions read in are

 Type seq. At. name  mult   symm  frac   pn    X    pn    Y    pn    Z    pn  u11 pn  u22 pn  u33 pn  u12 pn  u13 pn  u23 pn
 BA      1 BA1         24MM(001) 1.0000   0  .5000   0  .5000   0  .2390   0  .1   0  .1   0 3.7   0  .0   0  .0   0  .0   0
 IN      2 IN2         14/MMM001 1.0000   0  .0000   0  .0000   0  .0000   0  .3   0
 CU      3 CU3         14/MMM001  .5626   0  .0000   0  .0000   0  .5000   0 3.8   0 3.8   0 3.8   0  .0   0  .0   0  .0   0
 O       4 O4          2  MMM     .8471   0  .5000   0  .0000   0  .0000   0 6.3   0
 O       5 O5          24MM(001)  .4768   0  .0000   0  .0000   0  .2696   0 6.3   0
 O       6 O6          2  MMM     .7232   0  .5000   0  .0000   0  .5000   0 6.3   0
 IN      7 IN7         14/MMM001  .4374   0  .0000   0  .0000   0  .5000   0 3.8   0 3.8   0 3.8   0  .0   0  .0   0  .0   0

 Space group   F m 3 m           
 The lattice is centric  F-centered cubic         Laue symmetry m3m   
  Multiplicity of a general site is 192
  The symmetry of the point 0,0,0 contains 1bar

 The equivalent positions are:

 ( 1)     X      Y      Z  ( 2)     Z      X      Y  ( 3)     Y      Z      X 
 ( 4)     X      Y     -Z  ( 5)    -Z      X      Y  ( 6)     Y     -Z      X 
 ( 7)    -Z      X     -Y  ( 8)    -Y     -Z      X  ( 9)     Y     -Z     -X 
 (10)    -X      Y     -Z  (11)    -Z     -X      Y  (12)     X     -Y     -Z 
 (13)     Y      X      Z  (14)     Z      Y      X  (15)     X      Z      Y 
 (16)     Y      X     -Z  (17)    -Z      Y      X  (18)     X     -Z      Y 
 (19)    -Z      Y     -X  (20)    -X     -Z      Y  (21)     X     -Z     -Y 
 (22)    -Y      X     -Z  (23)    -Z     -Y      X  (24)     Y     -X     -Z 
 
1ba3cu3insc3o12                                                     GENLES   Version MS-DOS 2000-10-10T13:14:16  Page   3


 The atom positions read in are

 Type seq. At. name  mult   symm  frac   pn    X    pn    Y    pn    Z    pn  u11 pn  u22 pn  u33 pn  u12 pn  u13 pn  u23 pn
 AL      1 AL1         4   M3M   1.0000   0  .0000   0  .0000   0  .0000   0 2.5   0
  Constraints read are LNCN   1 1  5UISO  1.0000 1  6UISO  1.0000
 Parameter missing - 1  5UISO
 Parameter missing - 1  6UISO
                       LNCN   2 1  5FRAC -1.0000 1  6FRAC  1.0000
                       LNCN   3 1  5X     1.0000 1  6X     1.0000
                       LNCN   4 1  5Y     1.0000 1  6Y     1.0000
 Parameter missing - 1  5Y   
 Parameter missing - 1  6Y   
                       LNCN   5 1  5Z     1.0000 1  6Z     1.0000
 Parameter missing - 1  5Z   
 Parameter missing - 1  6Z   
                       LNCN   6 2  3UISO  1.0000 2  7UISO  1.0000
 Parameter missing - 2  3UISO
 Parameter missing - 2  7UISO
                       LNCN   7 2  7FRAC -1.0000 2  3FRAC  1.0000
 Parameter missing - 2  7FRAC
 Parameter missing - 2  3FRAC
                       LNCN   8 2  2FRAC -1.0000 2  8FRAC  1.0000
 Parameter missing - 2  2FRAC
 Parameter missing - 2  8FRAC
                       LNCN   9 2  2U11   1.0000 2  8U11   1.0000
 Parameter missing - 2  2U11 
 Parameter missing - 2  8U11 
                       LNCN  10 2  3U11   1.0000 2  7U11   1.0000 2  3U22   1.0000 2  7U22   1.0000
 Parameter missing - 2  3U11 
 Parameter missing - 2  7U11 
 Parameter missing - 2  3U22 
 Parameter missing - 2  7U22 
                       LNCN  10 2  3U33   1.0000 2  7U33   1.0000
 Parameter missing - 2  3U33 
 Parameter missing - 2  7U33 
                       LNCN  11 2  4UISO  1.0000 2  5UISO  1.0000 2  6UISO  1.0000
 Parameter missing - 2  4UISO
 Parameter missing - 2  5UISO
 Parameter missing - 2  6UISO
                       LNCN  12 2  5FRAC -1.0000 2  6FRAC  1.0000
 Parameter missing - 2  5FRAC
 Parameter missing - 2  6FRAC
                       LNCN  13 1  7UISO  1.0000 1  8UISO  1.0000 1  9UISO  1.0000

 Lattice parameters for phase 1 are:
    a         b         c          alpha      beta     gamma   
  12.071940 12.071940  8.485569   90.0000   90.0000   90.0000
 These cell parameters will be refined
 Reciprocal metric tensor elements:          damp= 0
 Element :          g11   pn          g22   pn          g33   pn        2*g12   pn        2*g13   pn        2*g23   pn
 Value   :   6.86192E-03  23   6.86192E-03  24   1.38879E-02  25  -1.66991E-10   0  -2.37569E-10   0  -2.37569E-10   0
 Constr. :          1.000  1          1.000  1          1.000  2           .000  0           .000  0           .000  0
1ba3cu3insc3o12                                                     GENLES   Version MS-DOS 2000-10-10T13:14:16  Page   4


 Lattice parameters for phase 2 are:
    a         b         c          alpha      beta     gamma   
   4.193875  4.193875  8.215494   90.0000   90.0000   90.0000
 These cell parameters will be refined
 Reciprocal metric tensor elements:          damp= 0
 Element :          g11   pn          g22   pn          g33   pn        2*g12   pn        2*g13   pn        2*g23   pn
 Value   :   5.68551E-02  26   5.68551E-02  27   1.48161E-02  28  -1.38362E-09   0  -7.06316E-10   0  -7.06316E-10   0
 Constr. :          1.000  3          1.000  3          1.000  4           .000  0           .000  0           .000  0

 Lattice parameters for phase 3 are:
    a         b         c          alpha      beta     gamma   
   4.050637  4.050637  4.050637   90.0000   90.0000   90.0000
 These cell parameters will be refined
 Reciprocal metric tensor elements:          damp= 0
 Element :          g11   pn          g22   pn          g33   pn        2*g12   pn        2*g13   pn        2*g23   pn
 Value   :   6.09472E-02  29   6.09472E-02  30   6.09472E-02  31  -1.48321E-09   0  -1.48321E-09   0  -1.48321E-09   0
 Constr. :          1.000  5          1.000  5          1.000  5           .000  0           .000  0           .000  0

 Phase/element fractions for phase no.  1

 Hist Elm:    PXC   1 1   nc
 Fraction:    2.7394      32
 Dmp/Cnst:    0     1.000  6

 Phase/element fractions for phase no.  2

 Hist Elm:    PXC   1 1   nc
 Fraction:    2.1368      33
 Dmp/Cnst:    0     1.000  7

 Phase/element fractions for phase no.  3

 Hist Elm:    PXC   1 1   nc
 Fraction:    3.1660      34
 Dmp/Cnst:    0     1.000  8

 Histogram scale factors:
 Hist.   :        1  PXC  pn
 Scale   :    2.8213      35
 Dmp/Cnst:    0     1.000  9

 Absorption coefficients for powder data:
 Hist/Typ:    1  PXC    1 pn
 Absc 1. :   -.93770E-02  36
 Dmp/Cnst:    0     1.000  1
 Absc 2. :    .00000       0
 Dmp/Cnst:    0     1.000  1
1ba3cu3insc3o12                                                     GENLES   Version MS-DOS 2000-10-10T13:14:16  Page   5

 
 Diffractometer constants for powder data:
 No. Type    Lam 1        Lam 2      Polariz.  pn Cnstr cn type    Zero  pn Cnstr cn    Kratio  pn Cnstr cn Damp
  1  PXC  1.5405000    1.5443000       .50000   0  .000  0  0    -3.151  37 1.000 11     .5000   0  .000  0    0

 Extinction coefficients for phase no.  1:
 Hist.   :        1  PXC  pn
 Extinct.:    .00000       0
 Dmp/Cnst:    0      .000  0

 Extinction coefficients for phase no.  2:
 Hist.   :        1  PXC  pn
 Extinct.:    .00000       0
 Dmp/Cnst:    0      .000  0

 Extinction coefficients for phase no.  3:
 Hist.   :        1  PXC  pn
 Extinct.:    .00000       0
 Dmp/Cnst:    0      .000  0

 Orientation distribution coefficients for powder data:
 No ODF data for phase  1
 No ODF data for phase  2
 No ODF data for phase  3

 Preferred orientation coeffs. for phase no.  1 histogram no.  1:
 Axis    :        1       pn
 Dir./typ:     .0  .0 1.0  0
 PO ratio:        1.0000   0
 Dmp/Cnst:    0      .000  0
 PO frac.:        1.0000   0
 Dmp/Cnst:    0      .000  0

 Preferred orientation coeffs. for phase no.  2 histogram no.  1:
 Axis    :        1       pn
 Dir./typ:     .0  .0 1.0  0
 PO ratio:        1.0553  38
 Dmp/Cnst:    0     1.000 12
 PO frac.:        1.0000   0
 Dmp/Cnst:    0      .000  0

 Preferred orientation coeffs. for phase no.  3 histogram no.  1:
 Axis    :        1       pn
 Dir./typ:     .0  .0 1.0  0
 PO ratio:        1.0000   0
 Dmp/Cnst:    0      .000  0
 PO frac.:        1.0000   0
 Dmp/Cnst:    0      .000  0

1ba3cu3insc3o12                                                     GENLES   Version MS-DOS 2000-10-10T13:14:16  Page   6


 Profile coeff. for function type  3, phase no.  1 and histogram no.  1; aniso. axis   0.   0.   1.; damp= 0:
 Coeff.  :      GU    pn      GV    pn      GW    pn      GP    pn      LX    pn      LY    pn     S/L    pn     H/L    pn
 Value   : 6.344E+02  39-1.675E+02  41 2.355E+01  43 2.312E+01  45 7.721E+00  47 1.279E+00  49 5.000E-04   0 5.000E-04   0
 Constr. :      1.000 13      1.000 15      1.000 17      1.000 19      1.000 21      1.000 23       .000  0       .000  0
 Coeff.  :     trns   pn     shft   pn     stec   pn     ptec   pn     sfec   pn     L11    pn     L22    pn     L33    pn
 Value   :-5.293E+00   0 1.850E-01   0 0.000E+00   0-2.715E+00   0 0.000E+00   0 0.000E+00   0 0.000E+00   0 0.000E+00   0
 Constr. :       .000  0       .000  0       .000  0       .000  0       .000  0       .000  0       .000  0       .000  0
 Coeff.  :     L12    pn     L13    pn     L23    pn
 Value   : 0.000E+00   0 0.000E+00   0 0.000E+00   0
 Constr. :       .000  0       .000  0       .000  0

 Profile coeff. for function type  3, phase no.  2 and histogram no.  1; aniso. axis   0.   0.   1.; damp= 0:
 Coeff.  :      GU    pn      GV    pn      GW    pn      GP    pn      LX    pn      LY    pn     S/L    pn     H/L    pn
 Value   : 9.624E+01  40-9.079E+01  42 3.057E+01  44 1.173E+01  46 1.350E+00  48 3.506E+01  50 5.000E-04   0 5.000E-04   0
 Constr. :      1.000 14      1.000 16      1.000 18      1.000 20      1.000 22      1.000 24       .000  0       .000  0
 Coeff.  :     trns   pn     shft   pn     stec   pn     ptec   pn     sfec   pn     L11    pn     L22    pn     L33    pn
 Value   : 9.695E+00   0-1.890E+00   0 2.001E+01   0 0.000E+00   0 0.000E+00   0 0.000E+00   0 0.000E+00   0 0.000E+00   0
 Constr. :       .000  0       .000  0       .000  0       .000  0       .000  0       .000  0       .000  0       .000  0
 Coeff.  :     L12    pn     L13    pn     L23    pn
 Value   : 0.000E+00   0 0.000E+00   0 0.000E+00   0
 Constr. :       .000  0       .000  0       .000  0

 Profile coeff. for function type  3, phase no.  3 and histogram no.  1; aniso. axis   0.   0.   1.; damp= 0:
 Coeff.  :      GU    pn      GV    pn      GW    pn      GP    pn      LX    pn      LY    pn     S/L    pn     H/L    pn
 Value   : 1.000E-01   0-2.000E+00   0 1.063E+02   0 0.000E+00   0 0.000E+00   0 0.000E+00   0 5.000E-04   0 5.000E-04   0
 Constr. :       .000  0       .000  0       .000  0       .000  0       .000  0       .000  0       .000  0       .000  0
 Coeff.  :     trns   pn     shft   pn     stec   pn     ptec   pn     sfec   pn     L11    pn     L22    pn     L33    pn
 Value   : 0.000E+00   0 0.000E+00   0 0.000E+00   0 0.000E+00   0 0.000E+00   0 0.000E+00   0 0.000E+00   0 0.000E+00   0
 Constr. :       .000  0       .000  0       .000  0       .000  0       .000  0       .000  0       .000  0       .000  0
 Coeff.  :     L12    pn     L13    pn     L23    pn
 Value   : 0.000E+00   0 0.000E+00   0 0.000E+00   0
 Constr. :       .000  0       .000  0       .000  0

 Diffuse scattering coefficients for powder data:
 No diffuse scattering coefficients for histogram    1

 Background coefficients for powder data:
 Histogram no.:    1 Damping factor:    0 Use all points: Y
 Power series in Q**2n/n! and n!/Q**2n
 Param.  :          1   pn          2   pn          3   pn          4   pn          5   pn          6   pn
 Coeff.  :  .48881E+03  51  .14077E+00  52  .40261E+02  53 -.50550E-01  54  .11978E+01  55  .32989E-02  56

 The constraint matrix has   56 terms
1ba3cu3insc3o12                                                     GENLES   Version MS-DOS 2000-10-10T13:14:16  Page   7


 Restraint data statistics:

 Powder data statistics                Fitted         All               Average
              Bank Ndata Sum(w*d**2)  wRp     Rp    wRp     Rp     DWd  Integral
 Hstgm  1 PXC   1  5739  8907.1      .0445  .0343  .0445  .0343   1.342    .939
 Powder totals     5739  8907.1      .0445  .0343  .0445  .0343   1.342

 No serial correlation in fit at 90% confidence for 1.933 < DWd < 2.067
 Cycle1219 There were  5739 observations. Total before-cycle CHI**2 = 8.9071E+03

 Reduced CHI**2 =  1.564     for   44 variables                                 

 Reflection data statistics
 Histogram  1  Type PXC   Nobs=  763 R(F**2) =   .0288

    3 Columns of the    44 Column matrix are 0.0
         Variable 2  1PF 4 was not refined
         Variable    1ABS1 was not refined
         Variable    1HSCL was not refined

 The value of the determinant is   .5002*10.0**(   -27)

 Atom parameters for phase no. 1
                      frac       x         y         z     100*Uiso  100*U11  100*U22  100*U33  100*U12  100*U13  100*U23
 BA    (  1) Values  : 1.000   .000000   .000000   .000000     .627
             Sigmas  :                                         .053
             Shft/esd:                                          .00
 BA1      moved   .00A     sum(shift/e.s.d)**2 :     .00

 BA    (  2) Values  : 1.000   .279095   .779095   .000000     .310
             Sigmas  :         .000071   .000071               .046
             Shft/esd:             .00       .00                .00
 BA2      moved   .00A     sum(shift/e.s.d)**2 :     .00

 CU    (  3) Values  : 1.000   .500000   .000000   .250000     .054
             Sigmas  :                                         .146
             Shft/esd:                                          .00
 CU3      moved   .00A     sum(shift/e.s.d)**2 :     .00

 CU    (  4) Values  : 1.000   .105301   .605303   .000000     .224
             Sigmas  :         .000170   .000170               .119
             Shft/esd:             .00       .00                .00
 CU4      moved   .00A     sum(shift/e.s.d)**2 :     .00

 IN    (  5) Values  :  .799   .242537   .000000   .250000     .014
             Sigmas  :  .004   .000084                             
             Shft/esd:   .00      -.01                             
 IN5      moved   .00A     sum(shift/e.s.d)**2 :     .00

1ba3cu3insc3o12                                                     GENLES   Version MS-DOS 2000-10-10T13:14:22  Page   8

 SC    (  6) Values  :  .201   .242537   .000000   .250000     .014
             Sigmas  :  .004   .000084                             
             Shft/esd:   .00      -.01                             
 SC6      moved   .00A     sum(shift/e.s.d)**2 :     .00

 O     (  7) Values  : 1.000   .112577   .612576   .224753     .404
             Sigmas  :         .000587   .000587   .001034     .111
             Shft/esd:             .00       .00       .00      .00
 O7       moved   .00A     sum(shift/e.s.d)**2 :     .00

 O     (  8) Values  : 1.000   .130251   .130251   .250000     .404
             Sigmas  :         .000656   .000656               .111
             Shft/esd:             .00       .00                .00
 O8       moved   .00A     sum(shift/e.s.d)**2 :     .00

 O     (  9) Values  : 1.000   .237322   .503594   .000000     .404
             Sigmas  :         .001074   .000605               .111
             Shft/esd:             .01       .00                .00
 O9       moved   .00A     sum(shift/e.s.d)**2 :     .00

 Maximum atom shift:    .00
 Atomic parameter sum(shift/error)**2 for phase 1 :       .00
 Calculated unit cell formula weight:  4791.380, density:  6.434gm/cm**3

 Atom parameters for phase no. 2
                      frac       x         y         z     100*Uiso  100*U11  100*U22  100*U33  100*U12  100*U13  100*U23
 Calculated unit cell formula weight:   540.971, density:  6.217gm/cm**3

 Atom parameters for phase no. 3
                      frac       x         y         z     100*Uiso  100*U11  100*U22  100*U33  100*U12  100*U13  100*U23
 Calculated unit cell formula weight:   107.928, density:  2.697gm/cm**3

 Phase/element fractions for phase no.  1

 Hist Elem:      1 1 PXC                                                                                                     
 Fraction :    2.73944                                                                                                       
 Sigmas   :    .105846E-01                                                                                                   
 Shift/esd:        .00                                                                                                       
 Wt. Frac.:     .89758                                                                                                       
 Sigmas   :    .355185E-03                                                                                                   

 Phase/element fractions for phase no.  2

 Hist Elem:      1 1 PXC                                                                                                     
 Fraction :    2.13681                                                                                                       
 Sigmas   :    .203212E-01                                                                                                   
 Shift/esd:        .00                                                                                                       
 Wt. Frac.:     .79048E-01                                                                                                   
 Sigmas   :    .692328E-03                                                                                                   

 Phase/element fractions for phase no.  3

 Hist Elem:      1 1 PXC                                                                                                     
 Fraction :    3.16607                                                                                                       
 Sigmas   :    .120389                                                                                                       
 Shift/esd:        .00                                                                                                       
 Wt. Frac.:     .23367E-01                                                                                                   
 Sigmas   :    .867771E-03                                                                                                   
 Phase/element fraction sum(shift/error)**2 :       .00

 Histogram scale factors:

 Histogram:    1  PXC                                                                                                        
 Scale    :    2.82130                                                                                                       
 Sigmas   :    .000000                                                                                                       
 Shift/esd:        .00                                                                                                       
 Histogram scale factor sum(shift/error)**2 :       .00
1ba3cu3insc3o12                                                     GENLES   Version MS-DOS 2000-10-10T13:14:22  Page   9


 Lattice parameters for powder data:
 Phase  1
                 a         b         c       alpha     beta      gamma     volume
 Value    :  12.07195  12.07195   8.48557    90.000    90.000    90.000    1236.618
 Sigmas   :    .00023    .00023    .00019      .000      .000      .000        .065
 Recprocal metric tensor shift factor = 100%
 Phase  2
                 a         b         c       alpha     beta      gamma     volume
 Value    :   4.19388   4.19388   8.21549    90.000    90.000    90.000     144.499
 Sigmas   :    .00020    .00020    .00072      .000      .000      .000        .016
 Recprocal metric tensor shift factor = 100%
 Phase  3
                 a         b         c       alpha     beta      gamma     volume
 Value    :   4.05064   4.05064   4.05064    90.000    90.000    90.000      66.461
 Sigmas   :    .00053    .00053    .00053      .000      .000      .000        .026
 Recprocal metric tensor shift factor = 100%
 Recprocal metric tensor sum(shift/error)**2 :       .00

 Absorption coefficients for powder data:
 Hist.    :   1  PXC 
 Abscor. 1: -9.377E-03
 Sigmas   :  0.000E+00
 Shift/esd:        .00
 Abscor. 2:  0.000E+00
 Sigmas   :  0.000E+00
 Shift/esd:        .00
 Absorption coefficients sum(shift/error)**2 :       .00

 Diffractometer coefficients for powder data:
 Hist.    :   1  PXC 
 Zero       :     -3.15
 Sigmas     :       .07
 Shift/esd  :       .01
 Dif. Cons. Sum(shift/error)**2 :       .00

 Preferred orientation coeffs. for phase no.  2 axis no.  1:
 Hist.   :     1  PXC 
 Ratio    :     1.05530
 Sigmas   :      .00726
 Shift/esd:         .00
 Fraction :     1.00000
 Sigmas   :      .00000
 Shift/esd:         .00
 Preferred orientation sum(shift/error)**2 :       .00

 Profile coefficients for histogram no.  1 and for phase no.  1:
 Coeff.   :     GU         GV         GW         GP         LX         LY        S/L        H/L        trns       shft
 Value    :  6.345E+02 -1.676E+02  2.343E+01  2.327E+01  7.724E+00  1.269E+00  5.000E-04  5.000E-04 -5.293E+00  1.850E-01
 Sigmas   :  2.258E+02  2.682E+01  2.247E+02  2.249E+02  3.492E-01  1.238E+00                                            
 Shift/esd:        .00       -.01        .00        .00        .01       -.01                                            
 Coeff.   :    stec       ptec       sfec       L11        L22        L33        L12        L13        L23 
 Value    :  0.000E+00 -2.715E+00  0.000E+00  0.000E+00  0.000E+00  0.000E+00  0.000E+00  0.000E+00  0.000E+00
 Sigmas   :                                                                                                   
 Shift/esd:                                                                                                   
1ba3cu3insc3o12                                                     GENLES   Version MS-DOS 2000-10-10T13:14:22  Page  10


 Profile coefficients for histogram no.  1 and for phase no.  2:
 Coeff.   :     GU         GV         GW         GP         LX         LY        S/L        H/L        trns       shft
 Value    :  9.572E+01 -9.009E+01  3.042E+01  1.173E+01  1.350E+00  3.506E+01  5.000E-04  5.000E-04  9.695E+00 -1.890E+00
 Sigmas   :  1.500E+02  1.016E+02  1.987E+01  0.000E+00  2.230E+00  7.420E+00                                            
 Shift/esd:        .00        .01       -.01        .00        .00        .00                                            
 Coeff.   :    stec       ptec       sfec       L11        L22        L33        L12        L13        L23 
 Value    :  2.001E+01  0.000E+00  0.000E+00  0.000E+00  0.000E+00  0.000E+00  0.000E+00  0.000E+00  0.000E+00
 Sigmas   :                                                                                                   
 Shift/esd:                                                                                                   
 Profile coef. sum(shift/error)**2 :       .00

 Background coefficients for histogram no.  1:
 Param.   :           1              2              3              4              5              6
 Coeff.   :   4.888113E+02   1.413613E-01   4.026197E+01  -5.061338E-02   1.197664E+00   3.301195E-03
 Sigmas   :   2.240040E+00   3.612019E-01   2.095555E+00   3.265832E-02   1.647753E-01   1.275108E-03
 Shift/esd:            .00            .00            .00            .00            .00            .00
 Background coef. sum(shift/error)**2 :       .00

 Final variable sum((shift/esd)**2) for cycle1219:        .00 Time:    6.54 sec

 Convergence was achieved
1ba3cu3insc3o12                                                     PUBTABLE Version MS-DOS 2000-10-10T13:14:40  Page   1


--------------------------------------------------------------
Archiving C:/GSAS/phil/in3sc/IN3SC.EXP as C:/GSAS/phil/in3sc/IN3SC!474.EXP
--------------------------------------------------------------


--------------------------------------------------------------
Archiving C:/GSAS/phil/in3sc/IN3SC.EXP as C:/GSAS/phil/in3sc/IN3SC!475.EXP
--------------------------------------------------------------

Supplementary Material (ESI) for Journal of Materials Chemistry
This journal is (c) The Royal Society of Chemistry 2001
