# Supplementary material for: Synthesis, stoichiometry and structure of the quaternary scandium cuprate Ba3Cu3Sc4O12 and of 334-phase solid solution members Ba3Cu3Sc4 − xInxO12 (0 ≤ x ≤ 4)
Source: Royal Society of Chemistry journal article supplement (doi:10.1039/b008787o), 2001-01-01
Supplement: insc3dis.doc [file insc3dis.doc]

1Ba3Cu3Sc3InO12                                                              Version        2000-10-12T12:06:38  Page   1


                |----------------------------------------------|
                |         Program DISAGL Version MS-DOS        |
                | Crystal structure distance and angle program |
                |   Distributed on 15/ 7/1999; 0:25:16         |
                |----------------------------------------------|

        |---------------------------------------------------------------|
        |            Allen C. Larson and Robert B. Von Dreele           |
        |      Manuel Lujan, Jr. Neutron Scattering Center, MS-H805     |
        |      Los Alamos National Laboratory, Los Alamos, NM  87545    |
        |                                                               |
        | Copyright, 1999, The Regents of the University of California. |
        |---------------------------------------------------------------|
 
 The last history record is :
     HSTRY261 EXPEDT  MS-DOS 2000-10-12T12:06:30                          D  C   

 Space group I 4/mcm             
 The lattice is centric  I-centered tetragonal    Laue symmetry 4/mmm 
  Multiplicity of a general site is  32
  The symmetry of the point 0,0,0 contains 1bar

 The equivalent positions are:

 ( 1)     X      Y      Z  ( 2)    -Y      X      Z 
 ( 3)    -X     -Y      Z  ( 4)     Y     -X      Z 
 ( 5)    -X      Y  1/2+Z  ( 6)    -Y     -X  1/2+Z 
 ( 7)     X     -Y  1/2+Z  ( 8)     Y      X  1/2+Z 
 
 GENLES was run on 2000-10-10T23:15:53     Total cycles run 414   

 The Current Least-Squares controls are

 Maximum number of cycles is   10
 I/SigI cut-off is  1.00
 
 The atom type radii are

 TYPE     BOND      ANGLE
 BA       2.44000   2.24000
 CU       1.48000   1.28000
 IN       1.86000   1.66000
 SC       1.84000   1.64000
 O        1.09000    .89000

 Lattice constants are   11.95297  11.95297   8.42106  .00000  .00000  .00000
   Standard deviations     .00030    .00030    .00025  .00000  .00000  .00000

 DMAX is    4.50000 DAGL is    4.50000 and IAGL is     0

 The atoms read in are
1Ba3Cu3Sc3InO12                                                     DISAGL   Version MS-DOS 2000-10-12T12:06:38  Page   2

  BA1       .0000000(0)   .0000000(0)   .0000000(0) 4/M(001)  BA      1 1.000(0)
  BA2       .27777(9)     .77777(9)     .0000000(0) MM2(110)  BA      2 1.000(0)
  CU3       .5000000(0)   .0000000(0)   .2500000(0) -42M 001  CU      3 1.000(0)
  CU4       .10603(20)    .60603(20)    .0000000(0) MM2(110)  CU      4 1.000(0)
  IN5       .24178(17)    .0000000(0)   .2500000(0)   2(100)  IN      5  .260(3)
  SC6       .24178(17)    .0000000(0)   .2500000(0)   2(100)  SC      6  .740(3)
  O7        .1169(8)      .6169(8)      .2298(11)     M(+-0)  O       7 1.000(0)
  O8        .1297(8)      .1297(8)      .2500000(0)   2(110)  O       8 1.000(0)
  O9        .2422(15)     .5005(6)      .0000000(0)   M(001)  O       9 1.000(0)
1Ba3Cu3Sc3InO12                                                     DISAGL   Version MS-DOS 2000-10-12T12:06:38  Page   3


       Vector         Length           Optr Cell        Neighbor atom coordinates
      BA1_BA1         4.21053(13)        5 0 0-1      .00000    .00000   -.50000
      BA1_BA1         4.21053(13)        5 0 0 0      .00000    .00000    .50000
      BA1_BA2         4.25203(19)        1 0-1 0      .27777   -.22223    .00000
      BA1_BA2         4.25203(19)        2 1 0 0      .22223    .27777    .00000
      BA1_BA2         4.25203(19)        3 0 1 0     -.27777    .22223    .00000
      BA1_BA2         4.25203(19)        4-1 0 0     -.22223   -.27777    .00000
      BA1_IN5         3.5755(16)         1 0 0 0      .24178    .00000    .25000
      BA1_IN5         3.5755(16)         2 0 0 0      .00000    .24178    .25000
      BA1_IN5         3.5755(16)         3 0 0 0     -.24178    .00000    .25000
      BA1_IN5         3.5755(16)         4 0 0 0      .00000   -.24178    .25000
      BA1_IN5         3.5755(16)         5 0 0-1     -.24178    .00000   -.25000
      BA1_IN5         3.5755(16)         6 0 0-1      .00000   -.24178   -.25000
      BA1_IN5         3.5755(16)         7 0 0-1      .24178    .00000   -.25000
      BA1_IN5         3.5755(16)         8 0 0-1      .00000    .24178   -.25000
      BA1_SC6         3.5755(16)         1 0 0 0      .24178    .00000    .25000
      BA1_SC6         3.5755(16)         2 0 0 0      .00000    .24178    .25000
      BA1_SC6         3.5755(16)         3 0 0 0     -.24178    .00000    .25000
      BA1_SC6         3.5755(16)         4 0 0 0      .00000   -.24178    .25000
      BA1_SC6         3.5755(16)         5 0 0-1     -.24178    .00000   -.25000
      BA1_SC6         3.5755(16)         6 0 0-1      .00000   -.24178   -.25000
      BA1_SC6         3.5755(16)         7 0 0-1      .24178    .00000   -.25000
      BA1_SC6         3.5755(16)         8 0 0-1      .00000    .24178   -.25000
      BA1_O8          3.039(10)          1 0 0 0      .12966    .12966    .25000
      BA1_O8          3.039(10)          2 0 0 0     -.12966    .12966    .25000
      BA1_O8          3.039(10)          3 0 0 0     -.12966   -.12966    .25000
     *BA1_O8          3.039(10)          4 0 0 0      .12966   -.12966    .25000
     *BA1_O8          3.039(10)          5 0 0-1     -.12966    .12966   -.25000
     *BA1_O8          3.039(10)          6 0 0-1     -.12966   -.12966   -.25000
     *BA1_O8          3.039(10)          7 0 0-1      .12966   -.12966   -.25000
     *BA1_O8          3.039(10)          8 0 0-1      .12966    .12966   -.25000
     *BA1_O9          3.082(17)        105 0-1-1      .25780    .00049    .00000
     *BA1_O9          3.082(17)        106 0 0-1     -.00049    .25780    .00000
     *BA1_O9          3.082(17)        107-1 0-1     -.25780   -.00049    .00000
     *BA1_O9          3.082(17)        108-1-1-1      .00049   -.25780    .00000
 **** More than 24 Interatomic distances found ****
 Angles will be calculated between the first 25

            Angle             Degrees         atom 1 loc  atom 3 loc
         BA1_BA1_BA1         180.000(0)         5 0 0-1     5 0 0 0
         BA1_BA1_BA2          90.000(0)         5 0 0-1     1 0-1 0
         BA1_BA1_BA2          90.000(0)         5 0 0-1     2 1 0 0
         BA1_BA1_BA2          90.000(0)         5 0 0-1     3 0 1 0
         BA1_BA1_BA2          90.000(0)         5 0 0-1     4-1 0 0
         BA1_BA1_IN5         126.073(19)        5 0 0-1     1 0 0 0
         BA1_BA1_IN5         126.073(19)        5 0 0-1     2 0 0 0
         BA1_BA1_IN5         126.073(19)        5 0 0-1     3 0 0 0
         BA1_BA1_IN5         126.073(19)        5 0 0-1     4 0 0 0
         BA1_BA1_IN5          53.927(19)        5 0 0-1     5 0 0-1
         BA1_BA1_IN5          53.927(19)        5 0 0-1     6 0 0-1
         BA1_BA1_IN5          53.927(19)        5 0 0-1     7 0 0-1
         BA1_BA1_IN5          53.927(19)        5 0 0-1     8 0 0-1
         BA1_BA1_SC6         126.073(19)        5 0 0-1     1 0 0 0
         BA1_BA1_SC6         126.073(19)        5 0 0-1     2 0 0 0
         BA1_BA1_SC6         126.073(19)        5 0 0-1     3 0 0 0
         BA1_BA1_SC6         126.073(19)        5 0 0-1     4 0 0 0
         BA1_BA1_SC6          53.927(19)        5 0 0-1     5 0 0-1
1Ba3Cu3Sc3InO12                                                     DISAGL   Version MS-DOS 2000-10-12T12:06:38  Page   4


            Angle             Degrees         atom 1 loc  atom 3 loc
         BA1_BA1_SC6          53.927(19)        5 0 0-1     6 0 0-1
         BA1_BA1_SC6          53.927(19)        5 0 0-1     7 0 0-1
         BA1_BA1_SC6          53.927(19)        5 0 0-1     8 0 0-1
         BA1_BA1_O8          133.85(18)         5 0 0-1     1 0 0 0
         BA1_BA1_O8          133.85(18)         5 0 0-1     2 0 0 0
         BA1_BA1_O9          133.8(5)           5 0 0-1     3 0 0 0
         BA1_BA1_BA2          90.000(0)         5 0 0 0     1 0-1 0
         BA1_BA1_BA2          90.000(0)         5 0 0 0     2 1 0 0
         BA1_BA1_BA2          90.000(0)         5 0 0 0     3 0 1 0
         BA1_BA1_BA2          90.000(0)         5 0 0 0     4-1 0 0
         BA1_BA1_IN5          53.927(19)        5 0 0 0     1 0 0 0
         BA1_BA1_IN5          53.927(19)        5 0 0 0     2 0 0 0
         BA1_BA1_IN5          53.927(19)        5 0 0 0     3 0 0 0
         BA1_BA1_IN5          53.927(19)        5 0 0 0     4 0 0 0
         BA1_BA1_IN5         126.073(19)        5 0 0 0     5 0 0-1
         BA1_BA1_IN5         126.073(19)        5 0 0 0     6 0 0-1
         BA1_BA1_IN5         126.073(19)        5 0 0 0     7 0 0-1
         BA1_BA1_IN5         126.073(19)        5 0 0 0     8 0 0-1
         BA1_BA1_SC6          53.927(19)        5 0 0 0     1 0 0 0
         BA1_BA1_SC6          53.927(19)        5 0 0 0     2 0 0 0
         BA1_BA1_SC6          53.927(19)        5 0 0 0     3 0 0 0
         BA1_BA1_SC6          53.927(19)        5 0 0 0     4 0 0 0
         BA1_BA1_SC6         126.073(19)        5 0 0 0     5 0 0-1
         BA1_BA1_SC6         126.073(19)        5 0 0 0     6 0 0-1
         BA1_BA1_SC6         126.073(19)        5 0 0 0     7 0 0-1
         BA1_BA1_SC6         126.073(19)        5 0 0 0     8 0 0-1
         BA1_BA1_O8           46.15(18)         5 0 0 0     1 0 0 0
         BA1_BA1_O8           46.15(18)         5 0 0 0     2 0 0 0
         BA1_BA1_O9           46.15(17)         5 0 0 0     3 0 0 0
         BA2_BA1_BA2          90.000(0)         1 0-1 0     2 1 0 0
         BA2_BA1_BA2         180.000(0)         1 0-1 0     3 0 1 0
         BA2_BA1_BA2          90.000(0)         1 0-1 0     4-1 0 0
         BA2_BA1_IN5          50.865(18)        1 0-1 0     1 0 0 0
         BA2_BA1_IN5         120.327(16)        1 0-1 0     2 0 0 0
         BA2_BA1_IN5         129.135(18)        1 0-1 0     3 0 0 0
         BA2_BA1_IN5          59.673(16)        1 0-1 0     4 0 0 0
         BA2_BA1_IN5         129.135(18)        1 0-1 0     5 0 0-1
         BA2_BA1_IN5          59.673(16)        1 0-1 0     6 0 0-1
         BA2_BA1_IN5          50.865(18)        1 0-1 0     7 0 0-1
         BA2_BA1_IN5         120.327(16)        1 0-1 0     8 0 0-1
         BA2_BA1_SC6          50.865(18)        1 0-1 0     1 0 0 0
         BA2_BA1_SC6         120.327(16)        1 0-1 0     2 0 0 0
         BA2_BA1_SC6         129.135(18)        1 0-1 0     3 0 0 0
         BA2_BA1_SC6          59.673(16)        1 0-1 0     4 0 0 0
         BA2_BA1_SC6         129.135(18)        1 0-1 0     5 0 0-1
         BA2_BA1_SC6          59.673(16)        1 0-1 0     6 0 0-1
         BA2_BA1_SC6          50.865(18)        1 0-1 0     7 0 0-1
         BA2_BA1_SC6         120.327(16)        1 0-1 0     8 0 0-1
         BA2_BA1_O8           85.433(19)        1 0-1 0     1 0 0 0
         BA2_BA1_O8          135.79(18)         1 0-1 0     2 0 0 0
         BA2_BA1_O9           94.6(4)           1 0-1 0     3 0 0 0
         BA2_BA1_BA2          90.000(0)         2 1 0 0     3 0 1 0
         BA2_BA1_BA2         179.972(0)         2 1 0 0     4-1 0 0
         BA2_BA1_IN5          59.673(16)        2 1 0 0     1 0 0 0
         BA2_BA1_IN5          50.865(18)        2 1 0 0     2 0 0 0
         BA2_BA1_IN5         120.327(16)        2 1 0 0     3 0 0 0
1Ba3Cu3Sc3InO12                                                     DISAGL   Version MS-DOS 2000-10-12T12:06:38  Page   5


            Angle             Degrees         atom 1 loc  atom 3 loc
         BA2_BA1_IN5         129.135(18)        2 1 0 0     4 0 0 0
         BA2_BA1_IN5         120.327(16)        2 1 0 0     5 0 0-1
         BA2_BA1_IN5         129.135(18)        2 1 0 0     6 0 0-1
         BA2_BA1_IN5          59.673(16)        2 1 0 0     7 0 0-1
         BA2_BA1_IN5          50.865(18)        2 1 0 0     8 0 0-1
         BA2_BA1_SC6          59.673(16)        2 1 0 0     1 0 0 0
         BA2_BA1_SC6          50.865(18)        2 1 0 0     2 0 0 0
         BA2_BA1_SC6         120.327(16)        2 1 0 0     3 0 0 0
         BA2_BA1_SC6         129.135(18)        2 1 0 0     4 0 0 0
         BA2_BA1_SC6         120.327(16)        2 1 0 0     5 0 0-1
         BA2_BA1_SC6         129.135(18)        2 1 0 0     6 0 0-1
         BA2_BA1_SC6          59.673(16)        2 1 0 0     7 0 0-1
         BA2_BA1_SC6          50.865(18)        2 1 0 0     8 0 0-1
         BA2_BA1_O8           44.21(18)         2 1 0 0     1 0 0 0
         BA2_BA1_O8           85.433(19)        2 1 0 0     2 0 0 0
         BA2_BA1_O9          135.79(25)         2 1 0 0     3 0 0 0
         BA2_BA1_BA2          90.000(0)         3 0 1 0     4-1 0 0
         BA2_BA1_IN5         129.135(18)        3 0 1 0     1 0 0 0
         BA2_BA1_IN5          59.673(16)        3 0 1 0     2 0 0 0
         BA2_BA1_IN5          50.865(18)        3 0 1 0     3 0 0 0
         BA2_BA1_IN5         120.327(16)        3 0 1 0     4 0 0 0
         BA2_BA1_IN5          50.865(18)        3 0 1 0     5 0 0-1
         BA2_BA1_IN5         120.327(16)        3 0 1 0     6 0 0-1
         BA2_BA1_IN5         129.135(18)        3 0 1 0     7 0 0-1
         BA2_BA1_IN5          59.673(16)        3 0 1 0     8 0 0-1
         BA2_BA1_SC6         129.135(18)        3 0 1 0     1 0 0 0
         BA2_BA1_SC6          59.673(16)        3 0 1 0     2 0 0 0
         BA2_BA1_SC6          50.865(18)        3 0 1 0     3 0 0 0
         BA2_BA1_SC6         120.327(16)        3 0 1 0     4 0 0 0
         BA2_BA1_SC6          50.865(18)        3 0 1 0     5 0 0-1
         BA2_BA1_SC6         120.327(16)        3 0 1 0     6 0 0-1
         BA2_BA1_SC6         129.135(18)        3 0 1 0     7 0 0-1
         BA2_BA1_SC6          59.673(16)        3 0 1 0     8 0 0-1
         BA2_BA1_O8           94.567(19)        3 0 1 0     1 0 0 0
         BA2_BA1_O8           44.21(18)         3 0 1 0     2 0 0 0
         BA2_BA1_O9           85.43(14)         3 0 1 0     3 0 0 0
         BA2_BA1_IN5         120.327(16)        4-1 0 0     1 0 0 0
         BA2_BA1_IN5         129.135(18)        4-1 0 0     2 0 0 0
         BA2_BA1_IN5          59.673(16)        4-1 0 0     3 0 0 0
         BA2_BA1_IN5          50.865(18)        4-1 0 0     4 0 0 0
         BA2_BA1_IN5          59.673(16)        4-1 0 0     5 0 0-1
         BA2_BA1_IN5          50.865(18)        4-1 0 0     6 0 0-1
         BA2_BA1_IN5         120.327(16)        4-1 0 0     7 0 0-1
         BA2_BA1_IN5         129.135(18)        4-1 0 0     8 0 0-1
         BA2_BA1_SC6         120.327(16)        4-1 0 0     1 0 0 0
         BA2_BA1_SC6         129.135(18)        4-1 0 0     2 0 0 0
         BA2_BA1_SC6          59.673(16)        4-1 0 0     3 0 0 0
         BA2_BA1_SC6          50.865(18)        4-1 0 0     4 0 0 0
         BA2_BA1_SC6          59.673(16)        4-1 0 0     5 0 0-1
         BA2_BA1_SC6          50.865(18)        4-1 0 0     6 0 0-1
         BA2_BA1_SC6         120.327(16)        4-1 0 0     7 0 0-1
         BA2_BA1_SC6         129.135(18)        4-1 0 0     8 0 0-1
         BA2_BA1_O8          135.79(18)         4-1 0 0     1 0 0 0
         BA2_BA1_O8           94.567(19)        4-1 0 0     2 0 0 0
         BA2_BA1_O9           44.21(20)         4-1 0 0     3 0 0 0
         IN5_BA1_IN5          69.715(19)        1 0 0 0     2 0 0 0
1Ba3Cu3Sc3InO12                                                     DISAGL   Version MS-DOS 2000-10-12T12:06:38  Page   6


            Angle             Degrees         atom 1 loc  atom 3 loc
         IN5_BA1_IN5         107.85(4)          1 0 0 0     3 0 0 0
         IN5_BA1_IN5          69.715(19)        1 0 0 0     4 0 0 0
         IN5_BA1_IN5         180.000(0)         1 0 0 0     5 0 0-1
         IN5_BA1_IN5         110.285(19)        1 0 0 0     6 0 0-1
         IN5_BA1_IN5          72.15(4)          1 0 0 0     7 0 0-1
         IN5_BA1_IN5         110.285(19)        1 0 0 0     8 0 0-1
         IN5_BA1_SC6            .000(0)         1 0 0 0     1 0 0 0
         IN5_BA1_SC6          69.715(19)        1 0 0 0     2 0 0 0
         IN5_BA1_SC6         107.85(4)          1 0 0 0     3 0 0 0
         IN5_BA1_SC6          69.715(19)        1 0 0 0     4 0 0 0
         IN5_BA1_SC6         180.000(0)         1 0 0 0     5 0 0-1
         IN5_BA1_SC6         110.285(19)        1 0 0 0     6 0 0-1
         IN5_BA1_SC6          72.15(4)          1 0 0 0     7 0 0-1
         IN5_BA1_SC6         110.285(19)        1 0 0 0     8 0 0-1
         IN5_BA1_O8           34.908(12)        1 0 0 0     1 0 0 0
         IN5_BA1_O8           90.25(15)         1 0 0 0     2 0 0 0
         IN5_BA1_O9           90.25(22)         1 0 0 0     3 0 0 0
         IN5_BA1_IN5          69.715(19)        2 0 0 0     3 0 0 0
         IN5_BA1_IN5         107.85(4)          2 0 0 0     4 0 0 0
         IN5_BA1_IN5         110.285(19)        2 0 0 0     5 0 0-1
         IN5_BA1_IN5         180.000(0)         2 0 0 0     6 0 0-1
         IN5_BA1_IN5         110.285(19)        2 0 0 0     7 0 0-1
         IN5_BA1_IN5          72.15(4)          2 0 0 0     8 0 0-1
         IN5_BA1_SC6          69.715(19)        2 0 0 0     1 0 0 0
         IN5_BA1_SC6            .000(0)         2 0 0 0     2 0 0 0
         IN5_BA1_SC6          69.715(19)        2 0 0 0     3 0 0 0
         IN5_BA1_SC6         107.85(4)          2 0 0 0     4 0 0 0
         IN5_BA1_SC6         110.285(19)        2 0 0 0     5 0 0-1
         IN5_BA1_SC6         180.000(0)         2 0 0 0     6 0 0-1
         IN5_BA1_SC6         110.285(19)        2 0 0 0     7 0 0-1
         IN5_BA1_SC6          72.15(4)          2 0 0 0     8 0 0-1
         IN5_BA1_O8           34.908(12)        2 0 0 0     1 0 0 0
         IN5_BA1_O8           34.908(12)        2 0 0 0     2 0 0 0
         IN5_BA1_O9           90.25(14)         2 0 0 0     3 0 0 0
         IN5_BA1_IN5          69.715(19)        3 0 0 0     4 0 0 0
         IN5_BA1_IN5          72.15(4)          3 0 0 0     5 0 0-1
         IN5_BA1_IN5         110.285(19)        3 0 0 0     6 0 0-1
         IN5_BA1_IN5         180.000(0)         3 0 0 0     7 0 0-1
         IN5_BA1_IN5         110.285(19)        3 0 0 0     8 0 0-1
         IN5_BA1_SC6         107.85(4)          3 0 0 0     1 0 0 0
         IN5_BA1_SC6          69.715(19)        3 0 0 0     2 0 0 0
         IN5_BA1_SC6            .000(0)         3 0 0 0     3 0 0 0
         IN5_BA1_SC6          69.715(19)        3 0 0 0     4 0 0 0
         IN5_BA1_SC6          72.15(4)          3 0 0 0     5 0 0-1
         IN5_BA1_SC6         110.285(19)        3 0 0 0     6 0 0-1
         IN5_BA1_SC6         180.000(0)         3 0 0 0     7 0 0-1
         IN5_BA1_SC6         110.285(19)        3 0 0 0     8 0 0-1
         IN5_BA1_O8           90.25(15)         3 0 0 0     1 0 0 0
         IN5_BA1_O8           34.908(12)        3 0 0 0     2 0 0 0
         IN5_BA1_O9           34.91(26)         3 0 0 0     3 0 0 0
         IN5_BA1_IN5         110.285(19)        4 0 0 0     5 0 0-1
         IN5_BA1_IN5          72.15(4)          4 0 0 0     6 0 0-1
         IN5_BA1_IN5         110.285(19)        4 0 0 0     7 0 0-1
         IN5_BA1_IN5         180.000(0)         4 0 0 0     8 0 0-1
         IN5_BA1_SC6          69.715(19)        4 0 0 0     1 0 0 0
         IN5_BA1_SC6         107.85(4)          4 0 0 0     2 0 0 0
1Ba3Cu3Sc3InO12                                                     DISAGL   Version MS-DOS 2000-10-12T12:06:38  Page   7


            Angle             Degrees         atom 1 loc  atom 3 loc
         IN5_BA1_SC6          69.715(19)        4 0 0 0     3 0 0 0
         IN5_BA1_SC6            .000(0)         4 0 0 0     4 0 0 0
         IN5_BA1_SC6         110.285(19)        4 0 0 0     5 0 0-1
         IN5_BA1_SC6          72.15(4)          4 0 0 0     6 0 0-1
         IN5_BA1_SC6         110.285(19)        4 0 0 0     7 0 0-1
         IN5_BA1_SC6         180.000(0)         4 0 0 0     8 0 0-1
         IN5_BA1_O8           90.25(15)         4 0 0 0     1 0 0 0
         IN5_BA1_O8           90.25(15)         4 0 0 0     2 0 0 0
         IN5_BA1_O9           34.91(26)         4 0 0 0     3 0 0 0
         IN5_BA1_IN5          69.715(19)        5 0 0-1     6 0 0-1
         IN5_BA1_IN5         107.85(4)          5 0 0-1     7 0 0-1
         IN5_BA1_IN5          69.715(19)        5 0 0-1     8 0 0-1
         IN5_BA1_SC6         180.000(0)         5 0 0-1     1 0 0 0
         IN5_BA1_SC6         110.285(19)        5 0 0-1     2 0 0 0
         IN5_BA1_SC6          72.15(4)          5 0 0-1     3 0 0 0
         IN5_BA1_SC6         110.285(19)        5 0 0-1     4 0 0 0
         IN5_BA1_SC6            .000(0)         5 0 0-1     5 0 0-1
         IN5_BA1_SC6          69.715(19)        5 0 0-1     6 0 0-1
         IN5_BA1_SC6         107.85(4)          5 0 0-1     7 0 0-1
         IN5_BA1_SC6          69.715(19)        5 0 0-1     8 0 0-1
         IN5_BA1_O8          145.092(12)        5 0 0-1     1 0 0 0
         IN5_BA1_O8           89.75(15)         5 0 0-1     2 0 0 0
         IN5_BA1_O9           89.75(15)         5 0 0-1     3 0 0 0
         IN5_BA1_IN5          69.715(19)        6 0 0-1     7 0 0-1
         IN5_BA1_IN5         107.85(4)          6 0 0-1     8 0 0-1
         IN5_BA1_SC6         110.285(19)        6 0 0-1     1 0 0 0
         IN5_BA1_SC6         180.000(0)         6 0 0-1     2 0 0 0
         IN5_BA1_SC6         110.285(19)        6 0 0-1     3 0 0 0
         IN5_BA1_SC6          72.15(4)          6 0 0-1     4 0 0 0
         IN5_BA1_SC6          69.715(19)        6 0 0-1     5 0 0-1
         IN5_BA1_SC6            .000(0)         6 0 0-1     6 0 0-1
         IN5_BA1_SC6          69.715(19)        6 0 0-1     7 0 0-1
         IN5_BA1_SC6         107.85(4)          6 0 0-1     8 0 0-1
         IN5_BA1_O8          145.092(12)        6 0 0-1     1 0 0 0
         IN5_BA1_O8          145.092(12)        6 0 0-1     2 0 0 0
         IN5_BA1_O9           89.8(4)           6 0 0-1     3 0 0 0
         IN5_BA1_IN5          69.715(19)        7 0 0-1     8 0 0-1
         IN5_BA1_SC6          72.15(4)          7 0 0-1     1 0 0 0
         IN5_BA1_SC6         110.285(19)        7 0 0-1     2 0 0 0
         IN5_BA1_SC6         180.000(0)         7 0 0-1     3 0 0 0
         IN5_BA1_SC6         110.285(19)        7 0 0-1     4 0 0 0
         IN5_BA1_SC6         107.85(4)          7 0 0-1     5 0 0-1
         IN5_BA1_SC6          69.715(19)        7 0 0-1     6 0 0-1
         IN5_BA1_SC6            .000(0)         7 0 0-1     7 0 0-1
         IN5_BA1_SC6          69.715(19)        7 0 0-1     8 0 0-1
         IN5_BA1_O8           89.75(15)         7 0 0-1     1 0 0 0
         IN5_BA1_O8          145.092(12)        7 0 0-1     2 0 0 0
         IN5_BA1_O9          145.1(8)           7 0 0-1     3 0 0 0
         IN5_BA1_SC6         110.285(19)        8 0 0-1     1 0 0 0
         IN5_BA1_SC6          72.15(4)          8 0 0-1     2 0 0 0
         IN5_BA1_SC6         110.285(19)        8 0 0-1     3 0 0 0
         IN5_BA1_SC6         180.000(0)         8 0 0-1     4 0 0 0
         IN5_BA1_SC6          69.715(19)        8 0 0-1     5 0 0-1
         IN5_BA1_SC6         107.85(4)          8 0 0-1     6 0 0-1
         IN5_BA1_SC6          69.715(19)        8 0 0-1     7 0 0-1
         IN5_BA1_SC6            .000(0)         8 0 0-1     8 0 0-1
1Ba3Cu3Sc3InO12                                                     DISAGL   Version MS-DOS 2000-10-12T12:06:38  Page   8


            Angle             Degrees         atom 1 loc  atom 3 loc
         IN5_BA1_O8           89.75(15)         8 0 0-1     1 0 0 0
         IN5_BA1_O8           89.75(15)         8 0 0-1     2 0 0 0
         IN5_BA1_O9          145.09(28)         8 0 0-1     3 0 0 0
         SC6_BA1_SC6          69.715(19)        1 0 0 0     2 0 0 0
         SC6_BA1_SC6         107.85(4)          1 0 0 0     3 0 0 0
         SC6_BA1_SC6          69.715(19)        1 0 0 0     4 0 0 0
         SC6_BA1_SC6         180.000(0)         1 0 0 0     5 0 0-1
         SC6_BA1_SC6         110.285(19)        1 0 0 0     6 0 0-1
         SC6_BA1_SC6          72.15(4)          1 0 0 0     7 0 0-1
         SC6_BA1_SC6         110.285(19)        1 0 0 0     8 0 0-1
         SC6_BA1_O8           34.908(12)        1 0 0 0     1 0 0 0
         SC6_BA1_O8           90.25(15)         1 0 0 0     2 0 0 0
         SC6_BA1_O9           90.25(22)         1 0 0 0     3 0 0 0
         SC6_BA1_SC6          69.715(19)        2 0 0 0     3 0 0 0
         SC6_BA1_SC6         107.85(4)          2 0 0 0     4 0 0 0
         SC6_BA1_SC6         110.285(19)        2 0 0 0     5 0 0-1
         SC6_BA1_SC6         180.000(0)         2 0 0 0     6 0 0-1
         SC6_BA1_SC6         110.285(19)        2 0 0 0     7 0 0-1
         SC6_BA1_SC6          72.15(4)          2 0 0 0     8 0 0-1
         SC6_BA1_O8           34.908(12)        2 0 0 0     1 0 0 0
         SC6_BA1_O8           34.908(12)        2 0 0 0     2 0 0 0
         SC6_BA1_O9           90.25(14)         2 0 0 0     3 0 0 0
         SC6_BA1_SC6          69.715(19)        3 0 0 0     4 0 0 0
         SC6_BA1_SC6          72.15(4)          3 0 0 0     5 0 0-1
         SC6_BA1_SC6         110.285(19)        3 0 0 0     6 0 0-1
         SC6_BA1_SC6         180.000(0)         3 0 0 0     7 0 0-1
         SC6_BA1_SC6         110.285(19)        3 0 0 0     8 0 0-1
         SC6_BA1_O8           90.25(15)         3 0 0 0     1 0 0 0
         SC6_BA1_O8           34.908(12)        3 0 0 0     2 0 0 0
         SC6_BA1_O9           34.91(26)         3 0 0 0     3 0 0 0
         SC6_BA1_SC6         110.285(19)        4 0 0 0     5 0 0-1
         SC6_BA1_SC6          72.15(4)          4 0 0 0     6 0 0-1
         SC6_BA1_SC6         110.285(19)        4 0 0 0     7 0 0-1
         SC6_BA1_SC6         180.000(0)         4 0 0 0     8 0 0-1
         SC6_BA1_O8           90.25(15)         4 0 0 0     1 0 0 0
         SC6_BA1_O8           90.25(15)         4 0 0 0     2 0 0 0
         SC6_BA1_O9           34.91(26)         4 0 0 0     3 0 0 0
         SC6_BA1_SC6          69.715(19)        5 0 0-1     6 0 0-1
         SC6_BA1_SC6         107.85(4)          5 0 0-1     7 0 0-1
         SC6_BA1_SC6          69.715(19)        5 0 0-1     8 0 0-1
         SC6_BA1_O8          145.092(12)        5 0 0-1     1 0 0 0
         SC6_BA1_O8           89.75(15)         5 0 0-1     2 0 0 0
         SC6_BA1_O9           89.75(15)         5 0 0-1     3 0 0 0
         SC6_BA1_SC6          69.715(19)        6 0 0-1     7 0 0-1
         SC6_BA1_SC6         107.85(4)          6 0 0-1     8 0 0-1
         SC6_BA1_O8          145.092(12)        6 0 0-1     1 0 0 0
         SC6_BA1_O8          145.092(12)        6 0 0-1     2 0 0 0
         SC6_BA1_O9           89.8(4)           6 0 0-1     3 0 0 0
         SC6_BA1_SC6          69.715(19)        7 0 0-1     8 0 0-1
         SC6_BA1_O8           89.75(15)         7 0 0-1     1 0 0 0
         SC6_BA1_O8          145.092(12)        7 0 0-1     2 0 0 0
         SC6_BA1_O9          145.1(8)           7 0 0-1     3 0 0 0
         SC6_BA1_O8           89.75(15)         8 0 0-1     1 0 0 0
         SC6_BA1_O8           89.75(15)         8 0 0-1     2 0 0 0
         SC6_BA1_O9          145.09(28)         8 0 0-1     3 0 0 0
          O8_BA1_O8           61.32(20)         1 0 0 0     2 0 0 0
1Ba3Cu3Sc3InO12                                                     DISAGL   Version MS-DOS 2000-10-12T12:06:38  Page   9


            Angle             Degrees         atom 1 loc  atom 3 loc
          O8_BA1_O9           92.31(23)         1 0 0 0     3 0 0 0
          O8_BA1_O9           61.32(14)         2 0 0 0     3 0 0 0

       Vector         Length           Optr Cell        Neighbor atom coordinates
      BA2_BA1         4.25203(19)        1 0 1 0      .00000   1.00000    .00000
      BA2_BA1         4.25199(19)      105 0 0-1      .50000    .50000    .00000
      BA2_BA2         4.3140(7)          6 1 1-1      .22223    .72223   -.50000
      BA2_BA2         4.3140(7)          6 1 1 0      .22223    .72223    .50000
      BA2_CU3         4.3062(13)         1 0 1 0      .50000   1.00000    .25000
      BA2_CU3         4.3062(13)         5 1 1-1      .50000   1.00000   -.25000
      BA2_CU4         2.903(4)           1 0 0 0      .10603    .60603    .00000
      BA2_CU4         4.1622(20)         2 1 1 0      .39397   1.10603    .00000
      BA2_CU4         4.1622(20)         4 0 1 0      .60603    .89397    .00000
      BA2_IN5         3.4166(7)          1 0 1 0      .24178   1.00000    .25000
      BA2_IN5         3.9384(10)         4 0 1 0      .00000    .75822    .25000
      BA2_IN5         3.9384(10)         6 0 1-1      .00000    .75822   -.25000
      BA2_IN5         3.4166(7)          7 0 1-1      .24178   1.00000   -.25000
      BA2_IN5         3.4166(7)        102 0 0-1      .50000    .74178   -.25000
      BA2_IN5         3.9383(10)       103 0 0-1      .25822    .50000   -.25000
      BA2_IN5         3.9383(10)       105 0 0-1      .25822    .50000    .25000
      BA2_IN5         3.4166(7)        108 0 0-1      .50000    .74178    .25000
      BA2_SC6         3.4166(7)          1 0 1 0      .24178   1.00000    .25000
      BA2_SC6         3.9384(10)         4 0 1 0      .00000    .75822    .25000
      BA2_SC6         3.9384(10)         6 0 1-1      .00000    .75822   -.25000
      BA2_SC6         3.4166(7)          7 0 1-1      .24178   1.00000   -.25000
      BA2_SC6         3.4166(7)        102 0 0-1      .50000    .74178   -.25000
      BA2_SC6         3.9383(10)       103 0 0-1      .25822    .50000   -.25000
      BA2_SC6         3.9383(10)       105 0 0-1      .25822    .50000    .25000
      BA2_SC6         3.4166(7)        108 0 0-1      .50000    .74178    .25000
     *BA2_O7          3.337(13)          1 0 0 0      .11694    .61694    .22983
     *BA2_O7          2.889(10)          6 1 1-1      .38306    .88306   -.27017
     *BA2_O7          3.337(13)         -3 0 0 0      .11694    .61694   -.22983
     *BA2_O7          2.889(10)         -8 1 1 1      .38306    .88306    .27017
     *BA2_O8          2.965(9)           4 0 1 0      .12966    .87034    .25000
     *BA2_O8          2.965(9)           7 0 1-1      .12966    .87034   -.25000
     *BA2_O8          2.965(9)         102 0 0-1      .37034    .62966   -.25000
     *BA2_O8          2.965(9)         105 0 0-1      .37034    .62966    .25000
     *BA2_O9          3.342(8)           1 0 0 0      .24220    .50049    .00000
     *BA2_O9          2.673(8)           4 0 1 0      .50049    .75780    .00000
     *BA2_O9          2.673(8)         105 0 0-1      .25780   1.00049    .00000
     *BA2_O9          3.342(8)         108-1 0-1      .00049    .74220    .00000
 **** More than 24 Interatomic distances found ****
 Angles will be calculated between the first 25

            Angle             Degrees         atom 1 loc  atom 3 loc
         BA1_BA2_BA1         167.32(4)          1 0 1 0   105 0 0-1
         BA1_BA2_BA2          88.623(8)         1 0 1 0     6 1 1-1
         BA1_BA2_BA2          88.623(8)         1 0 1 0     6 1 1 0
         BA1_BA2_CU3          95.527(17)        1 0 1 0     1 0 1 0
         BA1_BA2_CU3          95.527(17)        1 0 1 0     5 1 1-1
         BA1_BA2_CU4          83.660(20)        1 0 1 0     1 0 0 0
         BA1_BA2_CU4          70.83(4)          1 0 1 0     2 1 1 0
         BA1_BA2_CU4         121.85(5)          1 0 1 0     4 0 1 0
         BA1_BA2_IN5          54.265(30)        1 0 1 0     1 0 1 0
         BA1_BA2_IN5          51.593(25)        1 0 1 0     4 0 1 0
         BA1_BA2_IN5          51.593(25)        1 0 1 0     6 0 1-1
1Ba3Cu3Sc3InO12                                                     DISAGL   Version MS-DOS 2000-10-12T12:06:38  Page  10


            Angle             Degrees         atom 1 loc  atom 3 loc
         BA1_BA2_IN5          54.265(30)        1 0 1 0     7 0 1-1
         BA1_BA2_IN5         133.295(30)        1 0 1 0   102 0 0-1
         BA1_BA2_IN5         118.71(4)          1 0 1 0   103 0 0-1
         BA1_BA2_IN5         118.71(4)          1 0 1 0   105 0 0-1
         BA1_BA2_IN5         133.295(30)        1 0 1 0   108 0 0-1
         BA1_BA2_SC6          54.265(30)        1 0 1 0     1 0 1 0
         BA1_BA2_SC6          51.593(25)        1 0 1 0     4 0 1 0
         BA1_BA2_SC6          51.593(25)        1 0 1 0     6 0 1-1
         BA1_BA2_SC6          54.265(30)        1 0 1 0     7 0 1-1
         BA1_BA2_SC6         133.295(30)        1 0 1 0   102 0 0-1
         BA1_BA2_SC6         118.71(4)          1 0 1 0   103 0 0-1
         BA1_BA2_SC6         118.71(4)          1 0 1 0   105 0 0-1
         BA1_BA2_O9          133.3(6)           1 0 1 0   108 0 0-1
         BA1_BA2_BA2          88.623(8)       105 0 0-1     6 1 1-1
         BA1_BA2_BA2          88.623(8)       105 0 0-1     6 1 1 0
         BA1_BA2_CU3          95.527(17)      105 0 0-1     1 0 1 0
         BA1_BA2_CU3          95.527(17)      105 0 0-1     5 1 1-1
         BA1_BA2_CU4          83.662(20)      105 0 0-1     1 0 0 0
         BA1_BA2_CU4         121.85(5)        105 0 0-1     2 1 1 0
         BA1_BA2_CU4          70.83(4)        105 0 0-1     4 0 1 0
         BA1_BA2_IN5         133.296(30)      105 0 0-1     1 0 1 0
         BA1_BA2_IN5         118.71(4)        105 0 0-1     4 0 1 0
         BA1_BA2_IN5         118.71(4)        105 0 0-1     6 0 1-1
         BA1_BA2_IN5         133.296(30)      105 0 0-1     7 0 1-1
         BA1_BA2_IN5          54.266(30)      105 0 0-1   102 0 0-1
         BA1_BA2_IN5          51.594(25)      105 0 0-1   103 0 0-1
         BA1_BA2_IN5          51.594(25)      105 0 0-1   105 0 0-1
         BA1_BA2_IN5          54.266(30)      105 0 0-1   108 0 0-1
         BA1_BA2_SC6         133.296(30)      105 0 0-1     1 0 1 0
         BA1_BA2_SC6         118.71(4)        105 0 0-1     4 0 1 0
         BA1_BA2_SC6         118.71(4)        105 0 0-1     6 0 1-1
         BA1_BA2_SC6         133.296(30)      105 0 0-1     7 0 1-1
         BA1_BA2_SC6          54.266(30)      105 0 0-1   102 0 0-1
         BA1_BA2_SC6          51.594(25)      105 0 0-1   103 0 0-1
         BA1_BA2_SC6          51.594(25)      105 0 0-1   105 0 0-1
         BA1_BA2_O9           54.27(26)       105 0 0-1   108 0 0-1
         BA2_BA2_BA2         154.86(8)          6 1 1-1     6 1 1 0
         BA2_BA2_CU3         131.84(5)          6 1 1-1     1 0 1 0
         BA2_BA2_CU3          73.304(29)        6 1 1-1     5 1 1-1
         BA2_BA2_CU4          77.43(4)          6 1 1-1     1 0 0 0
         BA2_BA2_CU4         101.329(34)        6 1 1-1     2 1 1 0
         BA2_BA2_CU4         101.329(34)        6 1 1-1     4 0 1 0
         BA2_BA2_IN5         134.563(24)        6 1 1-1     1 0 1 0
         BA2_BA2_IN5         112.51(4)          6 1 1-1     4 0 1 0
         BA2_BA2_IN5          48.653(21)        6 1 1-1     6 0 1-1
         BA2_BA2_IN5          59.924(14)        6 1 1-1     7 0 1-1
         BA2_BA2_IN5          59.924(14)        6 1 1-1   102 0 0-1
         BA2_BA2_IN5          48.653(21)        6 1 1-1   103 0 0-1
         BA2_BA2_IN5         112.51(4)          6 1 1-1   105 0 0-1
         BA2_BA2_IN5         134.563(24)        6 1 1-1   108 0 0-1
         BA2_BA2_SC6         134.563(24)        6 1 1-1     1 0 1 0
         BA2_BA2_SC6         112.51(4)          6 1 1-1     4 0 1 0
         BA2_BA2_SC6          48.653(21)        6 1 1-1     6 0 1-1
         BA2_BA2_SC6          59.924(14)        6 1 1-1     7 0 1-1
         BA2_BA2_SC6          59.924(14)        6 1 1-1   102 0 0-1
         BA2_BA2_SC6          48.653(21)        6 1 1-1   103 0 0-1
1Ba3Cu3Sc3InO12                                                     DISAGL   Version MS-DOS 2000-10-12T12:06:38  Page  11


            Angle             Degrees         atom 1 loc  atom 3 loc
         BA2_BA2_SC6         112.51(4)          6 1 1-1   105 0 0-1
         BA2_BA2_O9          134.6(4)           6 1 1-1   108 0 0-1
         BA2_BA2_CU3          73.304(29)        6 1 1 0     1 0 1 0
         BA2_BA2_CU3         131.84(5)          6 1 1 0     5 1 1-1
         BA2_BA2_CU4          77.43(4)          6 1 1 0     1 0 0 0
         BA2_BA2_CU4         101.329(34)        6 1 1 0     2 1 1 0
         BA2_BA2_CU4         101.329(34)        6 1 1 0     4 0 1 0
         BA2_BA2_IN5          59.924(14)        6 1 1 0     1 0 1 0
         BA2_BA2_IN5          48.653(21)        6 1 1 0     4 0 1 0
         BA2_BA2_IN5         112.51(4)          6 1 1 0     6 0 1-1
         BA2_BA2_IN5         134.563(24)        6 1 1 0     7 0 1-1
         BA2_BA2_IN5         134.563(24)        6 1 1 0   102 0 0-1
         BA2_BA2_IN5         112.51(4)          6 1 1 0   103 0 0-1
         BA2_BA2_IN5          48.653(21)        6 1 1 0   105 0 0-1
         BA2_BA2_IN5          59.924(14)        6 1 1 0   108 0 0-1
         BA2_BA2_SC6          59.924(14)        6 1 1 0     1 0 1 0
         BA2_BA2_SC6          48.653(21)        6 1 1 0     4 0 1 0
         BA2_BA2_SC6         112.51(4)          6 1 1 0     6 0 1-1
         BA2_BA2_SC6         134.563(24)        6 1 1 0     7 0 1-1
         BA2_BA2_SC6         134.563(24)        6 1 1 0   102 0 0-1
         BA2_BA2_SC6         112.51(4)          6 1 1 0   103 0 0-1
         BA2_BA2_SC6          48.653(21)        6 1 1 0   105 0 0-1
         BA2_BA2_O9           59.92(16)         6 1 1 0   108 0 0-1
         CU3_BA2_CU3          58.535(19)        1 0 1 0     5 1 1-1
         CU3_BA2_CU4         150.733(10)        1 0 1 0     1 0 0 0
         CU3_BA2_CU4          38.064(28)        1 0 1 0     2 1 1 0
         CU3_BA2_CU4          38.064(28)        1 0 1 0     4 0 1 0
         CU3_BA2_IN5          45.32(4)          1 0 1 0     1 0 1 0
         CU3_BA2_IN5         107.175(20)        1 0 1 0     4 0 1 0
         CU3_BA2_IN5         144.881(34)        1 0 1 0     6 0 1-1
         CU3_BA2_IN5          84.224(34)        1 0 1 0     7 0 1-1
         CU3_BA2_IN5          84.224(34)        1 0 1 0   102 0 0-1
         CU3_BA2_IN5         144.882(34)        1 0 1 0   103 0 0-1
         CU3_BA2_IN5         107.175(20)        1 0 1 0   105 0 0-1
         CU3_BA2_IN5          45.32(4)          1 0 1 0   108 0 0-1
         CU3_BA2_SC6          45.32(4)          1 0 1 0     1 0 1 0
         CU3_BA2_SC6         107.175(20)        1 0 1 0     4 0 1 0
         CU3_BA2_SC6         144.881(34)        1 0 1 0     6 0 1-1
         CU3_BA2_SC6          84.224(34)        1 0 1 0     7 0 1-1
         CU3_BA2_SC6          84.224(34)        1 0 1 0   102 0 0-1
         CU3_BA2_SC6         144.882(34)        1 0 1 0   103 0 0-1
         CU3_BA2_SC6         107.175(20)        1 0 1 0   105 0 0-1
         CU3_BA2_O9           45.32(29)         1 0 1 0   108 0 0-1
         CU3_BA2_CU4         150.733(10)        5 1 1-1     1 0 0 0
         CU3_BA2_CU4          38.064(28)        5 1 1-1     2 1 1 0
         CU3_BA2_CU4          38.064(28)        5 1 1-1     4 0 1 0
         CU3_BA2_IN5          84.224(34)        5 1 1-1     1 0 1 0
         CU3_BA2_IN5         144.881(34)        5 1 1-1     4 0 1 0
         CU3_BA2_IN5         107.175(20)        5 1 1-1     6 0 1-1
         CU3_BA2_IN5          45.32(4)          5 1 1-1     7 0 1-1
         CU3_BA2_IN5          45.32(4)          5 1 1-1   102 0 0-1
         CU3_BA2_IN5         107.175(20)        5 1 1-1   103 0 0-1
         CU3_BA2_IN5         144.882(34)        5 1 1-1   105 0 0-1
         CU3_BA2_IN5          84.224(34)        5 1 1-1   108 0 0-1
         CU3_BA2_SC6          84.224(34)        5 1 1-1     1 0 1 0
         CU3_BA2_SC6         144.881(34)        5 1 1-1     4 0 1 0
1Ba3Cu3Sc3InO12                                                     DISAGL   Version MS-DOS 2000-10-12T12:06:38  Page  12


            Angle             Degrees         atom 1 loc  atom 3 loc
         CU3_BA2_SC6         107.175(20)        5 1 1-1     6 0 1-1
         CU3_BA2_SC6          45.32(4)          5 1 1-1     7 0 1-1
         CU3_BA2_SC6          45.32(4)          5 1 1-1   102 0 0-1
         CU3_BA2_SC6         107.175(20)        5 1 1-1   103 0 0-1
         CU3_BA2_SC6         144.882(34)        5 1 1-1   105 0 0-1
         CU3_BA2_O9           84.22(21)         5 1 1-1   108 0 0-1
         CU4_BA2_CU4         154.49(4)          1 0 0 0     2 1 1 0
         CU4_BA2_CU4         154.49(4)          1 0 0 0     4 0 1 0
         CU4_BA2_IN5         117.43(4)          1 0 0 0     1 0 1 0
         CU4_BA2_IN5          50.351(31)        1 0 0 0     4 0 1 0
         CU4_BA2_IN5          50.351(31)        1 0 0 0     6 0 1-1
         CU4_BA2_IN5         117.43(4)          1 0 0 0     7 0 1-1
         CU4_BA2_IN5         117.43(4)          1 0 0 0   102 0 0-1
         CU4_BA2_IN5          50.352(31)        1 0 0 0   103 0 0-1
         CU4_BA2_IN5          50.352(31)        1 0 0 0   105 0 0-1
         CU4_BA2_IN5         117.43(4)          1 0 0 0   108 0 0-1
         CU4_BA2_SC6         117.43(4)          1 0 0 0     1 0 1 0
         CU4_BA2_SC6          50.351(31)        1 0 0 0     4 0 1 0
         CU4_BA2_SC6          50.351(31)        1 0 0 0     6 0 1-1
         CU4_BA2_SC6         117.43(4)          1 0 0 0     7 0 1-1
         CU4_BA2_SC6         117.43(4)          1 0 0 0   102 0 0-1
         CU4_BA2_SC6          50.352(31)        1 0 0 0   103 0 0-1
         CU4_BA2_SC6          50.352(31)        1 0 0 0   105 0 0-1
         CU4_BA2_O9          117.4(5)           1 0 0 0   108 0 0-1
         CU4_BA2_CU4          51.01(8)          2 1 1 0     4 0 1 0
         CU4_BA2_IN5          46.300(31)        2 1 1 0     1 0 1 0
         CU4_BA2_IN5         109.71(5)          2 1 1 0     4 0 1 0
         CU4_BA2_IN5         109.71(5)          2 1 1 0     6 0 1-1
         CU4_BA2_IN5          46.300(31)        2 1 1 0     7 0 1-1
         CU4_BA2_IN5          81.91(6)          2 1 1 0   102 0 0-1
         CU4_BA2_IN5         144.540(27)        2 1 1 0   103 0 0-1
         CU4_BA2_IN5         144.540(27)        2 1 1 0   105 0 0-1
         CU4_BA2_IN5          81.91(6)          2 1 1 0   108 0 0-1
         CU4_BA2_SC6          46.300(31)        2 1 1 0     1 0 1 0
         CU4_BA2_SC6         109.71(5)          2 1 1 0     4 0 1 0
         CU4_BA2_SC6         109.71(5)          2 1 1 0     6 0 1-1
         CU4_BA2_SC6          46.300(31)        2 1 1 0     7 0 1-1
         CU4_BA2_SC6          81.91(6)          2 1 1 0   102 0 0-1
         CU4_BA2_SC6         144.540(27)        2 1 1 0   103 0 0-1
         CU4_BA2_SC6         144.540(27)        2 1 1 0   105 0 0-1
         CU4_BA2_O9           81.91(32)         2 1 1 0   108 0 0-1
         CU4_BA2_IN5          81.91(6)          4 0 1 0     1 0 1 0
         CU4_BA2_IN5         144.540(27)        4 0 1 0     4 0 1 0
         CU4_BA2_IN5         144.540(27)        4 0 1 0     6 0 1-1
         CU4_BA2_IN5          81.91(6)          4 0 1 0     7 0 1-1
         CU4_BA2_IN5          46.301(31)        4 0 1 0   102 0 0-1
         CU4_BA2_IN5         109.71(5)          4 0 1 0   103 0 0-1
         CU4_BA2_IN5         109.71(5)          4 0 1 0   105 0 0-1
         CU4_BA2_IN5          46.301(31)        4 0 1 0   108 0 0-1
         CU4_BA2_SC6          81.91(6)          4 0 1 0     1 0 1 0
         CU4_BA2_SC6         144.540(27)        4 0 1 0     4 0 1 0
         CU4_BA2_SC6         144.540(27)        4 0 1 0     6 0 1-1
         CU4_BA2_SC6          81.91(6)          4 0 1 0     7 0 1-1
         CU4_BA2_SC6          46.301(31)        4 0 1 0   102 0 0-1
         CU4_BA2_SC6         109.71(5)          4 0 1 0   103 0 0-1
         CU4_BA2_SC6         109.71(5)          4 0 1 0   105 0 0-1
1Ba3Cu3Sc3InO12                                                     DISAGL   Version MS-DOS 2000-10-12T12:06:38  Page  13


            Angle             Degrees         atom 1 loc  atom 3 loc
         CU4_BA2_O9           46.30(18)         4 0 1 0   108 0 0-1
         IN5_BA2_IN5          67.08(5)          1 0 1 0     4 0 1 0
         IN5_BA2_IN5         105.62(5)          1 0 1 0     6 0 1-1
         IN5_BA2_IN5          76.077(19)        1 0 1 0     7 0 1-1
         IN5_BA2_IN5         125.14(7)          1 0 1 0   102 0 0-1
         IN5_BA2_IN5         167.78(4)          1 0 1 0   103 0 0-1
         IN5_BA2_IN5         108.577(7)         1 0 1 0   105 0 0-1
         IN5_BA2_IN5          79.40(6)          1 0 1 0   108 0 0-1
         IN5_BA2_SC6            .000(0)         1 0 1 0     1 0 1 0
         IN5_BA2_SC6          67.08(5)          1 0 1 0     4 0 1 0
         IN5_BA2_SC6         105.62(5)          1 0 1 0     6 0 1-1
         IN5_BA2_SC6          76.077(19)        1 0 1 0     7 0 1-1
         IN5_BA2_SC6         125.14(7)          1 0 1 0   102 0 0-1
         IN5_BA2_SC6         167.78(4)          1 0 1 0   103 0 0-1
         IN5_BA2_SC6         108.577(7)         1 0 1 0   105 0 0-1
         IN5_BA2_O9           79.40(33)         1 0 1 0   108 0 0-1
         IN5_BA2_IN5          64.627(18)        4 0 1 0     6 0 1-1
         IN5_BA2_IN5         105.62(5)          4 0 1 0     7 0 1-1
         IN5_BA2_IN5         167.78(4)          4 0 1 0   102 0 0-1
         IN5_BA2_IN5         100.70(6)          4 0 1 0   103 0 0-1
         IN5_BA2_IN5          67.31(6)          4 0 1 0   105 0 0-1
         IN5_BA2_IN5         108.577(7)         4 0 1 0   108 0 0-1
         IN5_BA2_SC6          67.08(5)          4 0 1 0     1 0 1 0
         IN5_BA2_SC6            .000(0)         4 0 1 0     4 0 1 0
         IN5_BA2_SC6          64.627(18)        4 0 1 0     6 0 1-1
         IN5_BA2_SC6         105.62(5)          4 0 1 0     7 0 1-1
         IN5_BA2_SC6         167.78(4)          4 0 1 0   102 0 0-1
         IN5_BA2_SC6         100.70(6)          4 0 1 0   103 0 0-1
         IN5_BA2_SC6          67.31(6)          4 0 1 0   105 0 0-1
         IN5_BA2_O9          108.6(4)           4 0 1 0   108 0 0-1
         IN5_BA2_IN5          67.08(5)          6 0 1-1     7 0 1-1
         IN5_BA2_IN5         108.577(7)         6 0 1-1   102 0 0-1
         IN5_BA2_IN5          67.31(6)          6 0 1-1   103 0 0-1
         IN5_BA2_IN5         100.70(6)          6 0 1-1   105 0 0-1
         IN5_BA2_IN5         167.78(4)          6 0 1-1   108 0 0-1
         IN5_BA2_SC6         105.62(5)          6 0 1-1     1 0 1 0
         IN5_BA2_SC6          64.627(18)        6 0 1-1     4 0 1 0
         IN5_BA2_SC6            .000(0)         6 0 1-1     6 0 1-1
         IN5_BA2_SC6          67.08(5)          6 0 1-1     7 0 1-1
         IN5_BA2_SC6         108.577(7)         6 0 1-1   102 0 0-1
         IN5_BA2_SC6          67.31(6)          6 0 1-1   103 0 0-1
         IN5_BA2_SC6         100.70(6)          6 0 1-1   105 0 0-1
         IN5_BA2_O9          167.8(21)          6 0 1-1   108 0 0-1
         IN5_BA2_IN5          79.40(6)          7 0 1-1   102 0 0-1
         IN5_BA2_IN5         108.577(7)         7 0 1-1   103 0 0-1
         IN5_BA2_IN5         167.78(4)          7 0 1-1   105 0 0-1
         IN5_BA2_IN5         125.14(7)          7 0 1-1   108 0 0-1
         IN5_BA2_SC6          76.077(19)        7 0 1-1     1 0 1 0
         IN5_BA2_SC6         105.62(5)          7 0 1-1     4 0 1 0
         IN5_BA2_SC6          67.08(5)          7 0 1-1     6 0 1-1
         IN5_BA2_SC6            .000(0)         7 0 1-1     7 0 1-1
         IN5_BA2_SC6          79.40(6)          7 0 1-1   102 0 0-1
         IN5_BA2_SC6         108.577(7)         7 0 1-1   103 0 0-1
         IN5_BA2_SC6         167.78(4)          7 0 1-1   105 0 0-1
         IN5_BA2_O9          125.1(5)           7 0 1-1   108 0 0-1
         IN5_BA2_IN5          67.08(5)        102 0 0-1   103 0 0-1
1Ba3Cu3Sc3InO12                                                     DISAGL   Version MS-DOS 2000-10-12T12:06:38  Page  14


            Angle             Degrees         atom 1 loc  atom 3 loc
         IN5_BA2_IN5         105.63(5)        102 0 0-1   105 0 0-1
         IN5_BA2_IN5          76.077(19)      102 0 0-1   108 0 0-1
         IN5_BA2_SC6         125.14(7)        102 0 0-1     1 0 1 0
         IN5_BA2_SC6         167.78(4)        102 0 0-1     4 0 1 0
         IN5_BA2_SC6         108.577(7)       102 0 0-1     6 0 1-1
         IN5_BA2_SC6          79.40(6)        102 0 0-1     7 0 1-1
         IN5_BA2_SC6            .000(0)       102 0 0-1   102 0 0-1
         IN5_BA2_SC6          67.08(5)        102 0 0-1   103 0 0-1
         IN5_BA2_SC6         105.63(5)        102 0 0-1   105 0 0-1
         IN5_BA2_O9           76.08(10)       102 0 0-1   108 0 0-1
         IN5_BA2_IN5          64.628(18)      103 0 0-1   105 0 0-1
         IN5_BA2_IN5         105.63(5)        103 0 0-1   108 0 0-1
         IN5_BA2_SC6         167.78(4)        103 0 0-1     1 0 1 0
         IN5_BA2_SC6         100.70(6)        103 0 0-1     4 0 1 0
         IN5_BA2_SC6          67.31(6)        103 0 0-1     6 0 1-1
         IN5_BA2_SC6         108.577(7)       103 0 0-1     7 0 1-1
         IN5_BA2_SC6          67.08(5)        103 0 0-1   102 0 0-1
         IN5_BA2_SC6            .000(0)       103 0 0-1   103 0 0-1
         IN5_BA2_SC6          64.628(18)      103 0 0-1   105 0 0-1
         IN5_BA2_O9          105.6(4)         103 0 0-1   108 0 0-1
         IN5_BA2_IN5          67.08(5)        105 0 0-1   108 0 0-1
         IN5_BA2_SC6         108.577(7)       105 0 0-1     1 0 1 0
         IN5_BA2_SC6          67.31(6)        105 0 0-1     4 0 1 0
         IN5_BA2_SC6         100.70(6)        105 0 0-1     6 0 1-1
         IN5_BA2_SC6         167.78(4)        105 0 0-1     7 0 1-1
         IN5_BA2_SC6         105.63(5)        105 0 0-1   102 0 0-1
         IN5_BA2_SC6          64.628(18)      105 0 0-1   103 0 0-1
         IN5_BA2_SC6            .000(0)       105 0 0-1   105 0 0-1
         IN5_BA2_O9           67.08(29)       105 0 0-1   108 0 0-1
         IN5_BA2_SC6          79.40(6)        108 0 0-1     1 0 1 0
         IN5_BA2_SC6         108.577(7)       108 0 0-1     4 0 1 0
         IN5_BA2_SC6         167.78(4)        108 0 0-1     6 0 1-1
         IN5_BA2_SC6         125.14(7)        108 0 0-1     7 0 1-1
         IN5_BA2_SC6          76.077(19)      108 0 0-1   102 0 0-1
         IN5_BA2_SC6         105.63(5)        108 0 0-1   103 0 0-1
         IN5_BA2_SC6          67.08(5)        108 0 0-1   105 0 0-1
         IN5_BA2_O9             .000(0)       108 0 0-1   108 0 0-1
         SC6_BA2_SC6          67.08(5)          1 0 1 0     4 0 1 0
         SC6_BA2_SC6         105.62(5)          1 0 1 0     6 0 1-1
         SC6_BA2_SC6          76.077(19)        1 0 1 0     7 0 1-1
         SC6_BA2_SC6         125.14(7)          1 0 1 0   102 0 0-1
         SC6_BA2_SC6         167.78(4)          1 0 1 0   103 0 0-1
         SC6_BA2_SC6         108.577(7)         1 0 1 0   105 0 0-1
         SC6_BA2_O9           79.40(33)         1 0 1 0   108 0 0-1
         SC6_BA2_SC6          64.627(18)        4 0 1 0     6 0 1-1
         SC6_BA2_SC6         105.62(5)          4 0 1 0     7 0 1-1
         SC6_BA2_SC6         167.78(4)          4 0 1 0   102 0 0-1
         SC6_BA2_SC6         100.70(6)          4 0 1 0   103 0 0-1
         SC6_BA2_SC6          67.31(6)          4 0 1 0   105 0 0-1
         SC6_BA2_O9          108.6(4)           4 0 1 0   108 0 0-1
         SC6_BA2_SC6          67.08(5)          6 0 1-1     7 0 1-1
         SC6_BA2_SC6         108.577(7)         6 0 1-1   102 0 0-1
         SC6_BA2_SC6          67.31(6)          6 0 1-1   103 0 0-1
         SC6_BA2_SC6         100.70(6)          6 0 1-1   105 0 0-1
         SC6_BA2_O9          167.8(21)          6 0 1-1   108 0 0-1
         SC6_BA2_SC6          79.40(6)          7 0 1-1   102 0 0-1
1Ba3Cu3Sc3InO12                                                     DISAGL   Version MS-DOS 2000-10-12T12:06:38  Page  15


            Angle             Degrees         atom 1 loc  atom 3 loc
         SC6_BA2_SC6         108.577(7)         7 0 1-1   103 0 0-1
         SC6_BA2_SC6         167.78(4)          7 0 1-1   105 0 0-1
         SC6_BA2_O9          125.1(5)           7 0 1-1   108 0 0-1
         SC6_BA2_SC6          67.08(5)        102 0 0-1   103 0 0-1
         SC6_BA2_SC6         105.63(5)        102 0 0-1   105 0 0-1
         SC6_BA2_O9           76.08(10)       102 0 0-1   108 0 0-1
         SC6_BA2_SC6          64.628(18)      103 0 0-1   105 0 0-1
         SC6_BA2_O9          105.6(4)         103 0 0-1   108 0 0-1
         SC6_BA2_O9           67.08(29)       105 0 0-1   108 0 0-1

       Vector         Length           Optr Cell        Neighbor atom coordinates
      CU3_BA2         4.3062(13)         1 0-1 0      .27777   -.22223    .00000
      CU3_BA2         4.3062(13)         3 1 1 0      .72223    .22223    .00000
      CU3_BA2         4.3062(13)         5 1-1 0      .72223   -.22223    .50000
      CU3_BA2         4.3062(13)         7 0 1 0      .27777    .22223    .50000
      CU3_CU3         4.21053(13)        5 1 0-1      .50000    .00000   -.25000
      CU3_CU3         4.21053(13)        5 1 0 0      .50000    .00000    .75000
      CU3_CU4         2.7649(22)         2 1 0 0      .39397    .10603    .00000
      CU3_CU4         2.7649(22)         4 0 0 0      .60603   -.10603    .00000
      CU3_CU4         2.7649(22)         6 1 0 0      .39397   -.10603    .50000
      CU3_CU4         2.7649(22)         8 0 0 0      .60603    .10603    .50000
      CU3_IN5         3.0865(20)         1 0 0 0      .24178    .00000    .25000
      CU3_IN5         3.0865(20)         3 1 0 0      .75822    .00000    .25000
      CU3_IN5         3.0865(20)       106 0 0-1      .50000    .25822    .25000
      CU3_IN5         3.0865(20)       108 0-1-1      .50000   -.25822    .25000
      CU3_SC6         3.0865(20)         1 0 0 0      .24178    .00000    .25000
      CU3_SC6         3.0865(20)         3 1 0 0      .75822    .00000    .25000
      CU3_SC6         3.0865(20)       106 0 0-1      .50000    .25822    .25000
      CU3_SC6         3.0865(20)       108 0-1-1      .50000   -.25822    .25000
      CU3_O7          1.984(13)          2 1 0 0      .38306    .11694    .22983
      CU3_O7          1.984(13)          4 0 0 0      .61694   -.11694    .22983
      CU3_O7          4.498(9)           6 1 0 0      .38306   -.11694    .72983
      CU3_O7          4.498(9)           8 0 0 0      .61694    .11694    .72983
      CU3_O7          4.498(9)          -2 0 0 0      .61694   -.11694   -.22983
      CU3_O7          4.498(9)          -4 1 0 0      .38306    .11694   -.22983
      CU3_O7          1.984(13)         -6 0 0 1      .61694    .11694    .27017
     *CU3_O7          1.984(13)         -8 1 0 1      .38306   -.11694    .27017
     *CU3_O9          3.580(14)          2 1 0 0      .49951    .24220    .00000
     *CU3_O9          3.580(14)          4 0 0 0      .50049   -.24220    .00000
     *CU3_O9          3.580(14)          6 1 0 0      .49951   -.24220    .50000
     *CU3_O9          3.580(14)          8 0 0 0      .50049    .24220    .50000
     *CU3_O9          3.580(14)        101 0-1 0      .74220    .00049    .50000
     *CU3_O9          3.580(14)        103 0 0 0      .25780   -.00049    .50000
     *CU3_O9          3.580(14)        105 0-1-1      .25780    .00049    .00000
     *CU3_O9          3.580(14)        107 0 0-1      .74220   -.00049    .00000
 **** More than 24 Interatomic distances found ****
 Angles will be calculated between the first 25

            Angle             Degrees         atom 1 loc  atom 3 loc
         BA2_CU3_BA2         121.465(19)        1 0-1 0     3 1 1 0
         BA2_CU3_BA2         103.828(8)         1 0-1 0     5 1-1 0
         BA2_CU3_BA2         103.829(8)         1 0-1 0     7 0 1 0
         BA2_CU3_CU3          60.733(10)        1 0-1 0     5 1 0-1
         BA2_CU3_CU3         119.267(10)        1 0-1 0     5 1 0 0
         BA2_CU3_CU4          68.145(20)        1 0-1 0     2 1 0 0
         BA2_CU3_CU4          68.146(20)        1 0-1 0     4 0 0 0
1Ba3Cu3Sc3InO12                                                     DISAGL   Version MS-DOS 2000-10-12T12:06:38  Page  16


            Angle             Degrees         atom 1 loc  atom 3 loc
         BA2_CU3_CU4          78.86(5)          1 0-1 0     6 1 0 0
         BA2_CU3_CU4         159.68(5)          1 0-1 0     8 0 0 0
         BA2_CU3_IN5          51.914(4)         1 0-1 0     1 0 0 0
         BA2_CU3_IN5         128.086(4)         1 0-1 0     3 1 0 0
         BA2_CU3_IN5         128.086(4)         1 0-1 0   106 0 0-1
         BA2_CU3_IN5          51.914(4)         1 0-1 0   108 0-1-1
         BA2_CU3_SC6          51.914(4)         1 0-1 0     1 0 0 0
         BA2_CU3_SC6         128.086(4)         1 0-1 0     3 1 0 0
         BA2_CU3_SC6         128.086(4)         1 0-1 0   106 0 0-1
         BA2_CU3_SC6          51.914(4)         1 0-1 0   108 0-1-1
         BA2_CU3_O7           87.60(13)         1 0-1 0     2 1 0 0
         BA2_CU3_O7           87.60(13)         1 0-1 0     4 0 0 0
         BA2_CU3_O7           93.20(17)         1 0-1 0     6 1 0 0
         BA2_CU3_O7          145.34(17)         1 0-1 0     8 0 0 0
         BA2_CU3_O7           63.95(4)          1 0-1 0    -2 0 0 0
         BA2_CU3_O7           63.95(4)          1 0-1 0    -4 1 0 0
         BA2_CU3_O9          155.6(5)           1 0-1 0    -6 0 0 1
         BA2_CU3_BA2         103.829(8)         3 1 1 0     5 1-1 0
         BA2_CU3_BA2         103.828(8)         3 1 1 0     7 0 1 0
         BA2_CU3_CU3          60.733(10)        3 1 1 0     5 1 0-1
         BA2_CU3_CU3         119.267(10)        3 1 1 0     5 1 0 0
         BA2_CU3_CU4          68.146(20)        3 1 1 0     2 1 0 0
         BA2_CU3_CU4          68.145(20)        3 1 1 0     4 0 0 0
         BA2_CU3_CU4         159.68(5)          3 1 1 0     6 1 0 0
         BA2_CU3_CU4          78.86(5)          3 1 1 0     8 0 0 0
         BA2_CU3_IN5         128.086(4)         3 1 1 0     1 0 0 0
         BA2_CU3_IN5          51.914(4)         3 1 1 0     3 1 0 0
         BA2_CU3_IN5          51.914(4)         3 1 1 0   106 0 0-1
         BA2_CU3_IN5         128.086(4)         3 1 1 0   108 0-1-1
         BA2_CU3_SC6         128.086(4)         3 1 1 0     1 0 0 0
         BA2_CU3_SC6          51.914(4)         3 1 1 0     3 1 0 0
         BA2_CU3_SC6          51.914(4)         3 1 1 0   106 0 0-1
         BA2_CU3_SC6         128.086(4)         3 1 1 0   108 0-1-1
         BA2_CU3_O7           87.60(13)         3 1 1 0     2 1 0 0
         BA2_CU3_O7           87.60(13)         3 1 1 0     4 0 0 0
         BA2_CU3_O7          145.34(17)         3 1 1 0     6 1 0 0
         BA2_CU3_O7           93.20(17)         3 1 1 0     8 0 0 0
         BA2_CU3_O7           63.95(4)          3 1 1 0    -2 0 0 0
         BA2_CU3_O7           63.95(4)          3 1 1 0    -4 1 0 0
         BA2_CU3_O9           34.18(11)         3 1 1 0    -6 0 0 1
         BA2_CU3_BA2         121.465(19)        5 1-1 0     7 0 1 0
         BA2_CU3_CU3         119.267(10)        5 1-1 0     5 1 0-1
         BA2_CU3_CU3          60.733(10)        5 1-1 0     5 1 0 0
         BA2_CU3_CU4         159.68(5)          5 1-1 0     2 1 0 0
         BA2_CU3_CU4          78.86(5)          5 1-1 0     4 0 0 0
         BA2_CU3_CU4          68.146(20)        5 1-1 0     6 1 0 0
         BA2_CU3_CU4          68.145(20)        5 1-1 0     8 0 0 0
         BA2_CU3_IN5         128.086(4)         5 1-1 0     1 0 0 0
         BA2_CU3_IN5          51.914(4)         5 1-1 0     3 1 0 0
         BA2_CU3_IN5         128.086(4)         5 1-1 0   106 0 0-1
         BA2_CU3_IN5          51.914(4)         5 1-1 0   108 0-1-1
         BA2_CU3_SC6         128.086(4)         5 1-1 0     1 0 0 0
         BA2_CU3_SC6          51.914(4)         5 1-1 0     3 1 0 0
         BA2_CU3_SC6         128.086(4)         5 1-1 0   106 0 0-1
         BA2_CU3_SC6          51.914(4)         5 1-1 0   108 0-1-1
         BA2_CU3_O7          155.64(27)         5 1-1 0     2 1 0 0
1Ba3Cu3Sc3InO12                                                     DISAGL   Version MS-DOS 2000-10-12T12:06:38  Page  17


            Angle             Degrees         atom 1 loc  atom 3 loc
         BA2_CU3_O7           34.18(27)         5 1-1 0     4 0 0 0
         BA2_CU3_O7           63.95(4)          5 1-1 0     6 1 0 0
         BA2_CU3_O7           63.95(4)          5 1-1 0     8 0 0 0
         BA2_CU3_O7           93.20(17)         5 1-1 0    -2 0 0 0
         BA2_CU3_O7          145.34(17)         5 1-1 0    -4 1 0 0
         BA2_CU3_O9           87.6(4)           5 1-1 0    -6 0 0 1
         BA2_CU3_CU3         119.267(10)        7 0 1 0     5 1 0-1
         BA2_CU3_CU3          60.733(10)        7 0 1 0     5 1 0 0
         BA2_CU3_CU4          78.86(5)          7 0 1 0     2 1 0 0
         BA2_CU3_CU4         159.68(5)          7 0 1 0     4 0 0 0
         BA2_CU3_CU4          68.145(20)        7 0 1 0     6 1 0 0
         BA2_CU3_CU4          68.146(20)        7 0 1 0     8 0 0 0
         BA2_CU3_IN5          51.914(4)         7 0 1 0     1 0 0 0
         BA2_CU3_IN5         128.086(4)         7 0 1 0     3 1 0 0
         BA2_CU3_IN5          51.914(4)         7 0 1 0   106 0 0-1
         BA2_CU3_IN5         128.086(4)         7 0 1 0   108 0-1-1
         BA2_CU3_SC6          51.914(4)         7 0 1 0     1 0 0 0
         BA2_CU3_SC6         128.086(4)         7 0 1 0     3 1 0 0
         BA2_CU3_SC6          51.914(4)         7 0 1 0   106 0 0-1
         BA2_CU3_SC6         128.086(4)         7 0 1 0   108 0-1-1
         BA2_CU3_O7           34.18(27)         7 0 1 0     2 1 0 0
         BA2_CU3_O7          155.64(27)         7 0 1 0     4 0 0 0
         BA2_CU3_O7           63.95(4)          7 0 1 0     6 1 0 0
         BA2_CU3_O7           63.95(4)          7 0 1 0     8 0 0 0
         BA2_CU3_O7          145.34(17)         7 0 1 0    -2 0 0 0
         BA2_CU3_O7           93.20(17)         7 0 1 0    -4 1 0 0
         BA2_CU3_O9           87.60(31)         7 0 1 0    -6 0 0 1
         CU3_CU3_CU3         180.000(0)         5 1 0-1     5 1 0 0
         CU3_CU3_CU4          40.41(5)          5 1 0-1     2 1 0 0
         CU3_CU3_CU4          40.41(5)          5 1 0-1     4 0 0 0
         CU3_CU3_CU4         139.59(5)          5 1 0-1     6 1 0 0
         CU3_CU3_CU4         139.59(5)          5 1 0-1     8 0 0 0
         CU3_CU3_IN5          90.000(0)         5 1 0-1     1 0 0 0
         CU3_CU3_IN5          90.000(0)         5 1 0-1     3 1 0 0
         CU3_CU3_IN5          90.000(0)         5 1 0-1   106 0 0-1
         CU3_CU3_IN5          90.000(0)         5 1 0-1   108 0-1-1
         CU3_CU3_SC6          90.000(0)         5 1 0-1     1 0 0 0
         CU3_CU3_SC6          90.000(0)         5 1 0-1     3 1 0 0
         CU3_CU3_SC6          90.000(0)         5 1 0-1   106 0 0-1
         CU3_CU3_SC6          90.000(0)         5 1 0-1   108 0-1-1
         CU3_CU3_O7           85.09(27)         5 1 0-1     2 1 0 0
         CU3_CU3_O7           85.09(27)         5 1 0-1     4 0 0 0
         CU3_CU3_O7          153.93(17)         5 1 0-1     6 1 0 0
         CU3_CU3_O7          153.93(17)         5 1 0-1     8 0 0 0
         CU3_CU3_O7           26.07(17)         5 1 0-1    -2 0 0 0
         CU3_CU3_O7           26.07(17)         5 1 0-1    -4 1 0 0
         CU3_CU3_O9           94.91(9)          5 1 0-1    -6 0 0 1
         CU3_CU3_CU4         139.59(5)          5 1 0 0     2 1 0 0
         CU3_CU3_CU4         139.59(5)          5 1 0 0     4 0 0 0
         CU3_CU3_CU4          40.41(5)          5 1 0 0     6 1 0 0
         CU3_CU3_CU4          40.41(5)          5 1 0 0     8 0 0 0
         CU3_CU3_IN5          90.000(0)         5 1 0 0     1 0 0 0
         CU3_CU3_IN5          90.000(0)         5 1 0 0     3 1 0 0
         CU3_CU3_IN5          90.000(0)         5 1 0 0   106 0 0-1
         CU3_CU3_IN5          90.000(0)         5 1 0 0   108 0-1-1
         CU3_CU3_SC6          90.000(0)         5 1 0 0     1 0 0 0
1Ba3Cu3Sc3InO12                                                     DISAGL   Version MS-DOS 2000-10-12T12:06:38  Page  18


            Angle             Degrees         atom 1 loc  atom 3 loc
         CU3_CU3_SC6          90.000(0)         5 1 0 0     3 1 0 0
         CU3_CU3_SC6          90.000(0)         5 1 0 0   106 0 0-1
         CU3_CU3_SC6          90.000(0)         5 1 0 0   108 0-1-1
         CU3_CU3_O7           94.91(27)         5 1 0 0     2 1 0 0
         CU3_CU3_O7           94.91(27)         5 1 0 0     4 0 0 0
         CU3_CU3_O7           26.07(17)         5 1 0 0     6 1 0 0
         CU3_CU3_O7           26.07(17)         5 1 0 0     8 0 0 0
         CU3_CU3_O7          153.93(17)         5 1 0 0    -2 0 0 0
         CU3_CU3_O7          153.93(17)         5 1 0 0    -4 1 0 0
         CU3_CU3_O9           85.09(7)          5 1 0 0    -6 0 0 1
         CU4_CU3_CU4          80.82(11)         2 1 0 0     4 0 0 0
         CU4_CU3_CU4         125.43(6)          2 1 0 0     6 1 0 0
         CU4_CU3_CU4         125.44(6)          2 1 0 0     8 0 0 0
         CU4_CU3_IN5          62.717(32)        2 1 0 0     1 0 0 0
         CU4_CU3_IN5         117.283(32)        2 1 0 0     3 1 0 0
         CU4_CU3_IN5          62.718(32)        2 1 0 0   106 0 0-1
         CU4_CU3_IN5         117.282(32)        2 1 0 0   108 0-1-1
         CU4_CU3_SC6          62.717(32)        2 1 0 0     1 0 0 0
         CU4_CU3_SC6         117.283(32)        2 1 0 0     3 1 0 0
         CU4_CU3_SC6          62.718(32)        2 1 0 0   106 0 0-1
         CU4_CU3_SC6         117.282(32)        2 1 0 0   108 0-1-1
         CU4_CU3_O7           44.68(28)         2 1 0 0     2 1 0 0
         CU4_CU3_O7          125.50(26)         2 1 0 0     4 0 0 0
         CU4_CU3_O7          133.15(10)         2 1 0 0     6 1 0 0
         CU4_CU3_O7          133.16(10)         2 1 0 0     8 0 0 0
         CU4_CU3_O7           66.48(19)         2 1 0 0    -2 0 0 0
         CU4_CU3_O7           14.34(16)         2 1 0 0    -4 1 0 0
         CU4_CU3_O9           93.74(17)         2 1 0 0    -6 0 0 1
         CU4_CU3_CU4         125.44(6)          4 0 0 0     6 1 0 0
         CU4_CU3_CU4         125.43(6)          4 0 0 0     8 0 0 0
         CU4_CU3_IN5         117.283(32)        4 0 0 0     1 0 0 0
         CU4_CU3_IN5          62.717(32)        4 0 0 0     3 1 0 0
         CU4_CU3_IN5         117.282(32)        4 0 0 0   106 0 0-1
         CU4_CU3_IN5          62.718(32)        4 0 0 0   108 0-1-1
         CU4_CU3_SC6         117.283(32)        4 0 0 0     1 0 0 0
         CU4_CU3_SC6          62.717(32)        4 0 0 0     3 1 0 0
         CU4_CU3_SC6         117.282(32)        4 0 0 0   106 0 0-1
         CU4_CU3_SC6          62.718(32)        4 0 0 0   108 0-1-1
         CU4_CU3_O7          125.50(26)         4 0 0 0     2 1 0 0
         CU4_CU3_O7           44.68(28)         4 0 0 0     4 0 0 0
         CU4_CU3_O7          133.16(10)         4 0 0 0     6 1 0 0
         CU4_CU3_O7          133.15(10)         4 0 0 0     8 0 0 0
         CU4_CU3_O7           14.34(16)         4 0 0 0    -2 0 0 0
         CU4_CU3_O7           66.48(19)         4 0 0 0    -4 1 0 0
         CU4_CU3_O9           93.7(4)           4 0 0 0    -6 0 0 1
         CU4_CU3_CU4          80.82(11)         6 1 0 0     8 0 0 0
         CU4_CU3_IN5          62.717(32)        6 1 0 0     1 0 0 0
         CU4_CU3_IN5         117.283(32)        6 1 0 0     3 1 0 0
         CU4_CU3_IN5         117.282(32)        6 1 0 0   106 0 0-1
         CU4_CU3_IN5          62.718(32)        6 1 0 0   108 0-1-1
         CU4_CU3_SC6          62.717(32)        6 1 0 0     1 0 0 0
         CU4_CU3_SC6         117.283(32)        6 1 0 0     3 1 0 0
         CU4_CU3_SC6         117.282(32)        6 1 0 0   106 0 0-1
         CU4_CU3_SC6          62.718(32)        6 1 0 0   108 0-1-1
         CU4_CU3_O7           93.74(20)         6 1 0 0     2 1 0 0
         CU4_CU3_O7           93.74(20)         6 1 0 0     4 0 0 0
1Ba3Cu3Sc3InO12                                                     DISAGL   Version MS-DOS 2000-10-12T12:06:38  Page  19


            Angle             Degrees         atom 1 loc  atom 3 loc
         CU4_CU3_O7           14.34(16)         6 1 0 0     6 1 0 0
         CU4_CU3_O7           66.48(19)         6 1 0 0     8 0 0 0
         CU4_CU3_O7          133.16(10)         6 1 0 0    -2 0 0 0
         CU4_CU3_O7          133.15(10)         6 1 0 0    -4 1 0 0
         CU4_CU3_O9          125.50(25)         6 1 0 0    -6 0 0 1
         CU4_CU3_IN5         117.283(32)        8 0 0 0     1 0 0 0
         CU4_CU3_IN5          62.717(32)        8 0 0 0     3 1 0 0
         CU4_CU3_IN5          62.718(32)        8 0 0 0   106 0 0-1
         CU4_CU3_IN5         117.282(32)        8 0 0 0   108 0-1-1
         CU4_CU3_SC6         117.283(32)        8 0 0 0     1 0 0 0
         CU4_CU3_SC6          62.717(32)        8 0 0 0     3 1 0 0
         CU4_CU3_SC6          62.718(32)        8 0 0 0   106 0 0-1
         CU4_CU3_SC6         117.282(32)        8 0 0 0   108 0-1-1
         CU4_CU3_O7           93.74(20)         8 0 0 0     2 1 0 0
         CU4_CU3_O7           93.74(20)         8 0 0 0     4 0 0 0
         CU4_CU3_O7           66.48(19)         8 0 0 0     6 1 0 0
         CU4_CU3_O7           14.34(16)         8 0 0 0     8 0 0 0
         CU4_CU3_O7          133.15(10)         8 0 0 0    -2 0 0 0
         CU4_CU3_O7          133.16(10)         8 0 0 0    -4 1 0 0
         CU4_CU3_O9           44.68(6)          8 0 0 0    -6 0 0 1
         IN5_CU3_IN5         179.980(0)         1 0 0 0     3 1 0 0
         IN5_CU3_IN5          90.000(0)         1 0 0 0   106 0 0-1
         IN5_CU3_IN5          90.000(0)         1 0 0 0   108 0-1-1
         IN5_CU3_SC6            .000(0)         1 0 0 0     1 0 0 0
         IN5_CU3_SC6         179.980(0)         1 0 0 0     3 1 0 0
         IN5_CU3_SC6          90.000(0)         1 0 0 0   106 0 0-1
         IN5_CU3_SC6          90.000(0)         1 0 0 0   108 0-1-1
         IN5_CU3_O7           45.209(23)        1 0 0 0     2 1 0 0
         IN5_CU3_O7          134.791(23)        1 0 0 0     4 0 0 0
         IN5_CU3_O7           71.90(11)         1 0 0 0     6 1 0 0
         IN5_CU3_O7          108.10(11)         1 0 0 0     8 0 0 0
         IN5_CU3_O7          108.10(11)         1 0 0 0    -2 0 0 0
         IN5_CU3_O7           71.90(11)         1 0 0 0    -4 1 0 0
         IN5_CU3_O9          134.79(30)         1 0 0 0    -6 0 0 1
         IN5_CU3_IN5          90.000(0)         3 1 0 0   106 0 0-1
         IN5_CU3_IN5          90.000(0)         3 1 0 0   108 0-1-1
         IN5_CU3_SC6         179.980(0)         3 1 0 0     1 0 0 0
         IN5_CU3_SC6            .000(0)         3 1 0 0     3 1 0 0
         IN5_CU3_SC6          90.000(0)         3 1 0 0   106 0 0-1
         IN5_CU3_SC6          90.000(0)         3 1 0 0   108 0-1-1
         IN5_CU3_O7          134.791(23)        3 1 0 0     2 1 0 0
         IN5_CU3_O7           45.209(23)        3 1 0 0     4 0 0 0
         IN5_CU3_O7          108.10(11)         3 1 0 0     6 1 0 0
         IN5_CU3_O7           71.90(11)         3 1 0 0     8 0 0 0
         IN5_CU3_O7           71.90(11)         3 1 0 0    -2 0 0 0
         IN5_CU3_O7          108.10(11)         3 1 0 0    -4 1 0 0
         IN5_CU3_O9           45.2(4)           3 1 0 0    -6 0 0 1
         IN5_CU3_IN5         179.980(0)       106 0 0-1   108 0-1-1
         IN5_CU3_SC6          90.000(0)       106 0 0-1     1 0 0 0
         IN5_CU3_SC6          90.000(0)       106 0 0-1     3 1 0 0
         IN5_CU3_SC6            .000(0)       106 0 0-1   106 0 0-1
         IN5_CU3_SC6         179.980(0)       106 0 0-1   108 0-1-1
         IN5_CU3_O7           45.210(23)      106 0 0-1     2 1 0 0
         IN5_CU3_O7          134.790(23)      106 0 0-1     4 0 0 0
         IN5_CU3_O7          108.10(11)       106 0 0-1     6 1 0 0
         IN5_CU3_O7           71.90(11)       106 0 0-1     8 0 0 0
1Ba3Cu3Sc3InO12                                                     DISAGL   Version MS-DOS 2000-10-12T12:06:38  Page  20


            Angle             Degrees         atom 1 loc  atom 3 loc
         IN5_CU3_O7          108.10(11)       106 0 0-1    -2 0 0 0
         IN5_CU3_O7           71.90(11)       106 0 0-1    -4 1 0 0
         IN5_CU3_O9           45.2(4)         106 0 0-1    -6 0 0 1
         IN5_CU3_SC6          90.000(0)       108 0-1-1     1 0 0 0
         IN5_CU3_SC6          90.000(0)       108 0-1-1     3 1 0 0
         IN5_CU3_SC6         179.980(0)       108 0-1-1   106 0 0-1
         IN5_CU3_SC6            .000(0)       108 0-1-1   108 0-1-1
         IN5_CU3_O7          134.790(23)      108 0-1-1     2 1 0 0
         IN5_CU3_O7           45.210(23)      108 0-1-1     4 0 0 0
         IN5_CU3_O7           71.90(11)       108 0-1-1     6 1 0 0
         IN5_CU3_O7          108.10(11)       108 0-1-1     8 0 0 0
         IN5_CU3_O7           71.90(11)       108 0-1-1    -2 0 0 0
         IN5_CU3_O7          108.10(11)       108 0-1-1    -4 1 0 0
         IN5_CU3_O9          134.8(6)         108 0-1-1    -6 0 0 1
         SC6_CU3_SC6         179.980(0)         1 0 0 0     3 1 0 0
         SC6_CU3_SC6          90.000(0)         1 0 0 0   106 0 0-1
         SC6_CU3_SC6          90.000(0)         1 0 0 0   108 0-1-1
         SC6_CU3_O7           45.209(23)        1 0 0 0     2 1 0 0
         SC6_CU3_O7          134.791(23)        1 0 0 0     4 0 0 0
         SC6_CU3_O7           71.90(11)         1 0 0 0     6 1 0 0
         SC6_CU3_O7          108.10(11)         1 0 0 0     8 0 0 0
         SC6_CU3_O7          108.10(11)         1 0 0 0    -2 0 0 0
         SC6_CU3_O7           71.90(11)         1 0 0 0    -4 1 0 0
         SC6_CU3_O9          134.79(30)         1 0 0 0    -6 0 0 1
         SC6_CU3_SC6          90.000(0)         3 1 0 0   106 0 0-1
         SC6_CU3_SC6          90.000(0)         3 1 0 0   108 0-1-1
         SC6_CU3_O7          134.791(23)        3 1 0 0     2 1 0 0
         SC6_CU3_O7           45.209(23)        3 1 0 0     4 0 0 0
         SC6_CU3_O7          108.10(11)         3 1 0 0     6 1 0 0
         SC6_CU3_O7           71.90(11)         3 1 0 0     8 0 0 0
         SC6_CU3_O7           71.90(11)         3 1 0 0    -2 0 0 0
         SC6_CU3_O7          108.10(11)         3 1 0 0    -4 1 0 0
         SC6_CU3_O9           45.2(4)           3 1 0 0    -6 0 0 1
         SC6_CU3_SC6         179.980(0)       106 0 0-1   108 0-1-1
         SC6_CU3_O7           45.210(23)      106 0 0-1     2 1 0 0
         SC6_CU3_O7          134.790(23)      106 0 0-1     4 0 0 0
         SC6_CU3_O7          108.10(11)       106 0 0-1     6 1 0 0
         SC6_CU3_O7           71.90(11)       106 0 0-1     8 0 0 0
         SC6_CU3_O7          108.10(11)       106 0 0-1    -2 0 0 0
         SC6_CU3_O7           71.90(11)       106 0 0-1    -4 1 0 0
         SC6_CU3_O9           45.2(4)         106 0 0-1    -6 0 0 1
         SC6_CU3_O7          134.790(23)      108 0-1-1     2 1 0 0
         SC6_CU3_O7           45.210(23)      108 0-1-1     4 0 0 0
         SC6_CU3_O7           71.90(11)       108 0-1-1     6 1 0 0
         SC6_CU3_O7          108.10(11)       108 0-1-1     8 0 0 0
         SC6_CU3_O7           71.90(11)       108 0-1-1    -2 0 0 0
         SC6_CU3_O7          108.10(11)       108 0-1-1    -4 1 0 0
         SC6_CU3_O9          134.8(6)         108 0-1-1    -6 0 0 1
          O7_CU3_O7          170.2(5)           2 1 0 0     4 0 0 0
          O7_CU3_O7           94.41(24)         2 1 0 0     6 1 0 0
          O7_CU3_O7           94.41(24)         2 1 0 0     8 0 0 0
          O7_CU3_O7          111.16(25)         2 1 0 0    -2 0 0 0
          O7_CU3_O7           59.0(4)           2 1 0 0    -4 1 0 0
          O7_CU3_O9           90.42(30)         2 1 0 0    -6 0 0 1
          O7_CU3_O7           94.41(24)         4 0 0 0     6 1 0 0
          O7_CU3_O7           94.41(24)         4 0 0 0     8 0 0 0
1Ba3Cu3Sc3InO12                                                     DISAGL   Version MS-DOS 2000-10-12T12:06:38  Page  21


            Angle             Degrees         atom 1 loc  atom 3 loc
          O7_CU3_O7           59.0(4)           4 0 0 0    -2 0 0 0
          O7_CU3_O7          111.16(25)         4 0 0 0    -4 1 0 0
          O7_CU3_O9           90.4(5)           4 0 0 0    -6 0 0 1
          O7_CU3_O7           52.14(34)         6 1 0 0     8 0 0 0
          O7_CU3_O7          143.79(23)         6 1 0 0    -2 0 0 0
          O7_CU3_O7          143.79(23)         6 1 0 0    -4 1 0 0
          O7_CU3_O9          111.16(22)         6 1 0 0    -6 0 0 1
          O7_CU3_O7          143.79(23)         8 0 0 0    -2 0 0 0
          O7_CU3_O7          143.79(23)         8 0 0 0    -4 1 0 0
          O7_CU3_O9           59.02(19)         8 0 0 0    -6 0 0 1
          O7_CU3_O7           52.14(34)        -2 0 0 0    -4 1 0 0
          O7_CU3_O9           94.41(24)        -2 0 0 0    -6 0 0 1
          O7_CU3_O9           94.41(11)        -4 1 0 0    -6 0 0 1

       Vector         Length           Optr Cell        Neighbor atom coordinates
      CU4_BA2         2.903(4)           1 0 0 0      .27777    .77777    .00000
      CU4_BA2         4.1622(20)         2 1 0 0      .22223    .27777    .00000
      CU4_BA2         4.1622(20)         4-1 1 0     -.22223    .72223    .00000
      CU4_CU3         2.7649(22)         2 0 0 0      .00000    .50000    .25000
      CU4_CU3         2.7649(22)         6 0 1-1      .00000    .50000   -.25000
      CU4_CU4         3.585(7)           3 0 1 0     -.10603    .39397    .00000
      CU4_IN5         3.0574(12)         4 0 1 0      .00000    .75822    .25000
      CU4_IN5         3.0574(12)         6 0 1-1      .00000    .75822   -.25000
      CU4_IN5         3.0574(12)       103 0 0-1      .25822    .50000   -.25000
      CU4_IN5         3.0574(12)       105 0 0-1      .25822    .50000    .25000
      CU4_SC6         3.0574(12)         4 0 1 0      .00000    .75822    .25000
      CU4_SC6         3.0574(12)         6 0 1-1      .00000    .75822   -.25000
      CU4_SC6         3.0574(12)       103 0 0-1      .25822    .50000   -.25000
      CU4_SC6         3.0574(12)       105 0 0-1      .25822    .50000    .25000
      CU4_O7          1.944(9)           1 0 0 0      .11694    .61694    .22983
      CU4_O7          4.237(12)          3 0 1 0     -.11694    .38306    .22983
      CU4_O7          3.507(11)          5 0 0-1     -.11694    .61694   -.27017
      CU4_O7          3.507(11)          7 0 1-1      .11694    .38306   -.27017
      CU4_O7          4.237(12)         -1 0 1 0     -.11694    .38306   -.22983
      CU4_O7          1.944(9)          -3 0 0 0      .11694    .61694   -.22983
      CU4_O7          3.507(11)         -5 0 1 1      .11694    .38306    .27017
      CU4_O7          3.507(11)         -7 0 0 1     -.11694    .61694    .27017
      CU4_O8          3.807(8)           4 0 1 0      .12966    .87034    .25000
      CU4_O8          3.807(8)           7 0 1-1      .12966    .87034   -.25000
      CU4_O8          3.807(8)         102 0 0-1      .37034    .62966   -.25000
     *CU4_O8          3.807(8)         105 0 0-1      .37034    .62966    .25000
     *CU4_O9          2.059(15)          1 0 0 0      .24220    .50049    .00000
     *CU4_O9          4.353(17)          3 0 1 0     -.24220    .49951    .00000
     *CU4_O9          4.353(17)        106 0 0-1     -.00049    .25780    .00000
     *CU4_O9          2.059(15)        108-1 0-1      .00049    .74220    .00000
 **** More than 24 Interatomic distances found ****
 Angles will be calculated between the first 25

            Angle             Degrees         atom 1 loc  atom 3 loc
         BA2_CU4_BA2         115.51(4)          1 0 0 0     2 1 0 0
         BA2_CU4_BA2         115.51(4)          1 0 0 0     4-1 1 0
         BA2_CU4_CU3         130.41(5)          1 0 0 0     2 0 0 0
         BA2_CU4_CU3         130.41(5)          1 0 0 0     6 0 1-1
         BA2_CU4_CU4         180.000(0)         1 0 0 0     3 0 1 0
         BA2_CU4_IN5          82.67(6)          1 0 0 0     4 0 1 0
         BA2_CU4_IN5          82.67(6)          1 0 0 0     6 0 1-1
1Ba3Cu3Sc3InO12                                                     DISAGL   Version MS-DOS 2000-10-12T12:06:38  Page  22


            Angle             Degrees         atom 1 loc  atom 3 loc
         BA2_CU4_IN5          82.67(6)          1 0 0 0   103 0 0-1
         BA2_CU4_IN5          82.67(6)          1 0 0 0   105 0 0-1
         BA2_CU4_SC6          82.67(6)          1 0 0 0     4 0 1 0
         BA2_CU4_SC6          82.67(6)          1 0 0 0     6 0 1-1
         BA2_CU4_SC6          82.67(6)          1 0 0 0   103 0 0-1
         BA2_CU4_SC6          82.67(6)          1 0 0 0   105 0 0-1
         BA2_CU4_O7           84.6(4)           1 0 0 0     1 0 0 0
         BA2_CU4_O7          152.82(16)         1 0 0 0     3 0 1 0
         BA2_CU4_O7          120.74(10)         1 0 0 0     5 0 0-1
         BA2_CU4_O7          120.74(10)         1 0 0 0     7 0 1-1
         BA2_CU4_O7          152.82(16)         1 0 0 0    -1 0 1 0
         BA2_CU4_O7           84.6(4)           1 0 0 0    -3 0 0 0
         BA2_CU4_O7          120.74(10)         1 0 0 0    -5 0 1 1
         BA2_CU4_O7          120.74(10)         1 0 0 0    -7 0 0 1
         BA2_CU4_O8           50.26(10)         1 0 0 0     4 0 1 0
         BA2_CU4_O8           50.26(10)         1 0 0 0     7 0 1-1
         BA2_CU4_O9           50.3(4)           1 0 0 0   102 0 0-1
         BA2_CU4_BA2         128.99(8)          2 1 0 0     4-1 1 0
         BA2_CU4_CU3          73.79(4)          2 1 0 0     2 0 0 0
         BA2_CU4_CU3          73.79(4)          2 1 0 0     6 0 1-1
         BA2_CU4_CU4          64.49(4)          2 1 0 0     3 0 1 0
         BA2_CU4_IN5         134.36(5)          2 1 0 0     4 0 1 0
         BA2_CU4_IN5         134.36(5)          2 1 0 0     6 0 1-1
         BA2_CU4_IN5          53.891(18)        2 1 0 0   103 0 0-1
         BA2_CU4_IN5          53.891(18)        2 1 0 0   105 0 0-1
         BA2_CU4_SC6         134.36(5)          2 1 0 0     4 0 1 0
         BA2_CU4_SC6         134.36(5)          2 1 0 0     6 0 1-1
         BA2_CU4_SC6          53.891(18)        2 1 0 0   103 0 0-1
         BA2_CU4_SC6          53.891(18)        2 1 0 0   105 0 0-1
         BA2_CU4_O7           92.34(16)         2 1 0 0     1 0 0 0
         BA2_CU4_O7           67.48(6)          2 1 0 0     3 0 1 0
         BA2_CU4_O7          106.78(16)         2 1 0 0     5 0 0-1
         BA2_CU4_O7           43.21(17)         2 1 0 0     7 0 1-1
         BA2_CU4_O7           67.48(6)          2 1 0 0    -1 0 1 0
         BA2_CU4_O7           92.34(16)         2 1 0 0    -3 0 0 0
         BA2_CU4_O7           43.21(17)         2 1 0 0    -5 0 1 1
         BA2_CU4_O7          106.78(16)         2 1 0 0    -7 0 0 1
         BA2_CU4_O8          139.25(16)         2 1 0 0     4 0 1 0
         BA2_CU4_O8          139.25(16)         2 1 0 0     7 0 1-1
         BA2_CU4_O9           78.05(15)         2 1 0 0   102 0 0-1
         BA2_CU4_CU3          73.79(4)          4-1 1 0     2 0 0 0
         BA2_CU4_CU3          73.79(4)          4-1 1 0     6 0 1-1
         BA2_CU4_CU4          64.49(4)          4-1 1 0     3 0 1 0
         BA2_CU4_IN5          53.892(18)        4-1 1 0     4 0 1 0
         BA2_CU4_IN5          53.892(18)        4-1 1 0     6 0 1-1
         BA2_CU4_IN5         134.37(5)          4-1 1 0   103 0 0-1
         BA2_CU4_IN5         134.37(5)          4-1 1 0   105 0 0-1
         BA2_CU4_SC6          53.892(18)        4-1 1 0     4 0 1 0
         BA2_CU4_SC6          53.892(18)        4-1 1 0     6 0 1-1
         BA2_CU4_SC6         134.37(5)          4-1 1 0   103 0 0-1
         BA2_CU4_SC6         134.37(5)          4-1 1 0   105 0 0-1
         BA2_CU4_O7           92.34(16)         4-1 1 0     1 0 0 0
         BA2_CU4_O7           67.48(6)          4-1 1 0     3 0 1 0
         BA2_CU4_O7           43.21(17)         4-1 1 0     5 0 0-1
         BA2_CU4_O7          106.78(16)         4-1 1 0     7 0 1-1
         BA2_CU4_O7           67.48(6)          4-1 1 0    -1 0 1 0
1Ba3Cu3Sc3InO12                                                     DISAGL   Version MS-DOS 2000-10-12T12:06:38  Page  23


            Angle             Degrees         atom 1 loc  atom 3 loc
         BA2_CU4_O7           92.34(16)         4-1 1 0    -3 0 0 0
         BA2_CU4_O7          106.78(16)         4-1 1 0    -5 0 1 1
         BA2_CU4_O7           43.21(17)         4-1 1 0    -7 0 0 1
         BA2_CU4_O8           78.05(17)         4-1 1 0     4 0 1 0
         BA2_CU4_O8           78.05(17)         4-1 1 0     7 0 1-1
         BA2_CU4_O9          139.2(8)           4-1 1 0   102 0 0-1
         CU3_CU4_CU3          99.18(11)         2 0 0 0     6 0 1-1
         CU3_CU4_CU4          49.59(5)          2 0 0 0     3 0 1 0
         CU3_CU4_IN5          63.796(33)        2 0 0 0     4 0 1 0
         CU3_CU4_IN5         127.38(7)          2 0 0 0     6 0 1-1
         CU3_CU4_IN5         127.37(7)          2 0 0 0   103 0 0-1
         CU3_CU4_IN5          63.795(33)        2 0 0 0   105 0 0-1
         CU3_CU4_SC6          63.796(33)        2 0 0 0     4 0 1 0
         CU3_CU4_SC6         127.38(7)          2 0 0 0     6 0 1-1
         CU3_CU4_SC6         127.37(7)          2 0 0 0   103 0 0-1
         CU3_CU4_SC6          63.795(33)        2 0 0 0   105 0 0-1
         CU3_CU4_O7           45.9(4)           2 0 0 0     1 0 0 0
         CU3_CU4_O7           22.41(15)         2 0 0 0     3 0 1 0
         CU3_CU4_O7           99.36(11)         2 0 0 0     5 0 0-1
         CU3_CU4_O7           99.36(11)         2 0 0 0     7 0 1-1
         CU3_CU4_O7           76.77(19)         2 0 0 0    -1 0 1 0
         CU3_CU4_O7          145.0(4)           2 0 0 0    -3 0 0 0
         CU3_CU4_O7           34.37(17)         2 0 0 0    -5 0 1 1
         CU3_CU4_O7           34.37(17)         2 0 0 0    -7 0 0 1
         CU3_CU4_O8           89.618(12)        2 0 0 0     4 0 1 0
         CU3_CU4_O8          146.67(17)         2 0 0 0     7 0 1-1
         CU3_CU4_O9          146.7(8)           2 0 0 0   102 0 0-1
         CU3_CU4_CU4          49.59(5)          6 0 1-1     3 0 1 0
         CU3_CU4_IN5         127.38(7)          6 0 1-1     4 0 1 0
         CU3_CU4_IN5          63.796(33)        6 0 1-1     6 0 1-1
         CU3_CU4_IN5          63.795(33)        6 0 1-1   103 0 0-1
         CU3_CU4_IN5         127.37(7)          6 0 1-1   105 0 0-1
         CU3_CU4_SC6         127.38(7)          6 0 1-1     4 0 1 0
         CU3_CU4_SC6          63.796(33)        6 0 1-1     6 0 1-1
         CU3_CU4_SC6          63.795(33)        6 0 1-1   103 0 0-1
         CU3_CU4_SC6         127.37(7)          6 0 1-1   105 0 0-1
         CU3_CU4_O7          145.0(4)           6 0 1-1     1 0 0 0
         CU3_CU4_O7           76.77(19)         6 0 1-1     3 0 1 0
         CU3_CU4_O7           34.37(17)         6 0 1-1     5 0 0-1
         CU3_CU4_O7           34.37(17)         6 0 1-1     7 0 1-1
         CU3_CU4_O7           22.41(15)         6 0 1-1    -1 0 1 0
         CU3_CU4_O7           45.9(4)           6 0 1-1    -3 0 0 0
         CU3_CU4_O7           99.36(11)         6 0 1-1    -5 0 1 1
         CU3_CU4_O7           99.36(11)         6 0 1-1    -7 0 0 1
         CU3_CU4_O8          146.67(17)         6 0 1-1     4 0 1 0
         CU3_CU4_O8           89.618(12)        6 0 1-1     7 0 1-1
         CU3_CU4_O9           89.62(31)         6 0 1-1   102 0 0-1
         CU4_CU4_IN5          97.33(6)          3 0 1 0     4 0 1 0
         CU4_CU4_IN5          97.33(6)          3 0 1 0     6 0 1-1
         CU4_CU4_IN5          97.33(6)          3 0 1 0   103 0 0-1
         CU4_CU4_IN5          97.33(6)          3 0 1 0   105 0 0-1
         CU4_CU4_SC6          97.33(6)          3 0 1 0     4 0 1 0
         CU4_CU4_SC6          97.33(6)          3 0 1 0     6 0 1-1
         CU4_CU4_SC6          97.33(6)          3 0 1 0   103 0 0-1
         CU4_CU4_SC6          97.33(6)          3 0 1 0   105 0 0-1
         CU4_CU4_O7           95.4(4)           3 0 1 0     1 0 0 0
1Ba3Cu3Sc3InO12                                                     DISAGL   Version MS-DOS 2000-10-12T12:06:38  Page  24


            Angle             Degrees         atom 1 loc  atom 3 loc
         CU4_CU4_O7           27.18(16)         3 0 1 0     3 0 1 0
         CU4_CU4_O7           59.26(10)         3 0 1 0     5 0 0-1
         CU4_CU4_O7           59.26(10)         3 0 1 0     7 0 1-1
         CU4_CU4_O7           27.18(16)         3 0 1 0    -1 0 1 0
         CU4_CU4_O7           95.4(4)           3 0 1 0    -3 0 0 0
         CU4_CU4_O7           59.26(10)         3 0 1 0    -5 0 1 1
         CU4_CU4_O7           59.26(10)         3 0 1 0    -7 0 0 1
         CU4_CU4_O8          129.74(10)         3 0 1 0     4 0 1 0
         CU4_CU4_O8          129.74(10)         3 0 1 0     7 0 1-1
         CU4_CU4_O9          129.7(4)           3 0 1 0   102 0 0-1
         IN5_CU4_IN5          87.04(4)          4 0 1 0     6 0 1-1
         IN5_CU4_IN5         165.33(13)         4 0 1 0   103 0 0-1
         IN5_CU4_IN5          91.10(4)          4 0 1 0   105 0 0-1
         IN5_CU4_SC6            .000(0)         4 0 1 0     4 0 1 0
         IN5_CU4_SC6          87.04(4)          4 0 1 0     6 0 1-1
         IN5_CU4_SC6         165.33(13)         4 0 1 0   103 0 0-1
         IN5_CU4_SC6          91.10(4)          4 0 1 0   105 0 0-1
         IN5_CU4_O7           45.77(4)          4 0 1 0     1 0 0 0
         IN5_CU4_O7           78.40(10)         4 0 1 0     3 0 1 0
         IN5_CU4_O7           96.29(18)         4 0 1 0     5 0 0-1
         IN5_CU4_O7          156.12(14)         4 0 1 0     7 0 1-1
         IN5_CU4_O7          115.35(13)         4 0 1 0    -1 0 1 0
         IN5_CU4_O7          132.33(10)         4 0 1 0    -3 0 0 0
         IN5_CU4_O7           91.20(17)         4 0 1 0    -5 0 1 1
         IN5_CU4_O7           38.38(12)         4 0 1 0    -7 0 0 1
         IN5_CU4_O8           32.46(11)         4 0 1 0     4 0 1 0
         IN5_CU4_O8           85.28(15)         4 0 1 0     7 0 1-1
         IN5_CU4_O9          132.9(9)           4 0 1 0   102 0 0-1
         IN5_CU4_IN5          91.10(4)          6 0 1-1   103 0 0-1
         IN5_CU4_IN5         165.33(13)         6 0 1-1   105 0 0-1
         IN5_CU4_SC6          87.04(4)          6 0 1-1     4 0 1 0
         IN5_CU4_SC6            .000(0)         6 0 1-1     6 0 1-1
         IN5_CU4_SC6          91.10(4)          6 0 1-1   103 0 0-1
         IN5_CU4_SC6         165.33(13)         6 0 1-1   105 0 0-1
         IN5_CU4_O7          132.33(10)         6 0 1-1     1 0 0 0
         IN5_CU4_O7          115.35(13)         6 0 1-1     3 0 1 0
         IN5_CU4_O7           38.38(12)         6 0 1-1     5 0 0-1
         IN5_CU4_O7           91.20(17)         6 0 1-1     7 0 1-1
         IN5_CU4_O7           78.40(10)         6 0 1-1    -1 0 1 0
         IN5_CU4_O7           45.77(4)          6 0 1-1    -3 0 0 0
         IN5_CU4_O7          156.12(14)         6 0 1-1    -5 0 1 1
         IN5_CU4_O7           96.29(18)         6 0 1-1    -7 0 0 1
         IN5_CU4_O8           85.28(15)         6 0 1-1     4 0 1 0
         IN5_CU4_O8           32.46(11)         6 0 1-1     7 0 1-1
         IN5_CU4_O9           85.4(5)           6 0 1-1   102 0 0-1
         IN5_CU4_IN5          87.03(4)        103 0 0-1   105 0 0-1
         IN5_CU4_SC6         165.33(13)       103 0 0-1     4 0 1 0
         IN5_CU4_SC6          91.10(4)        103 0 0-1     6 0 1-1
         IN5_CU4_SC6            .000(0)       103 0 0-1   103 0 0-1
         IN5_CU4_SC6          87.03(4)        103 0 0-1   105 0 0-1
         IN5_CU4_O7          132.33(10)       103 0 0-1     1 0 0 0
         IN5_CU4_O7          115.34(13)       103 0 0-1     3 0 1 0
         IN5_CU4_O7           91.20(17)       103 0 0-1     5 0 0-1
         IN5_CU4_O7           38.38(12)       103 0 0-1     7 0 1-1
         IN5_CU4_O7           78.40(10)       103 0 0-1    -1 0 1 0
         IN5_CU4_O7           45.77(4)        103 0 0-1    -3 0 0 0
1Ba3Cu3Sc3InO12                                                     DISAGL   Version MS-DOS 2000-10-12T12:06:38  Page  25


            Angle             Degrees         atom 1 loc  atom 3 loc
         IN5_CU4_O7           96.29(18)       103 0 0-1    -5 0 1 1
         IN5_CU4_O7          156.12(14)       103 0 0-1    -7 0 0 1
         IN5_CU4_O8          132.89(14)       103 0 0-1     4 0 1 0
         IN5_CU4_O8           85.36(16)       103 0 0-1     7 0 1-1
         IN5_CU4_O9           32.46(17)       103 0 0-1   102 0 0-1
         IN5_CU4_SC6          91.10(4)        105 0 0-1     4 0 1 0
         IN5_CU4_SC6         165.33(13)       105 0 0-1     6 0 1-1
         IN5_CU4_SC6          87.03(4)        105 0 0-1   103 0 0-1
         IN5_CU4_SC6            .000(0)       105 0 0-1   105 0 0-1
         IN5_CU4_O7           45.77(4)        105 0 0-1     1 0 0 0
         IN5_CU4_O7           78.40(10)       105 0 0-1     3 0 1 0
         IN5_CU4_O7          156.12(14)       105 0 0-1     5 0 0-1
         IN5_CU4_O7           96.29(18)       105 0 0-1     7 0 1-1
         IN5_CU4_O7          115.34(13)       105 0 0-1    -1 0 1 0
         IN5_CU4_O7          132.33(10)       105 0 0-1    -3 0 0 0
         IN5_CU4_O7           38.38(12)       105 0 0-1    -5 0 1 1
         IN5_CU4_O7           91.20(17)       105 0 0-1    -7 0 0 1
         IN5_CU4_O8           85.36(16)       105 0 0-1     4 0 1 0
         IN5_CU4_O8          132.89(14)       105 0 0-1     7 0 1-1
         IN5_CU4_O9           85.28(18)       105 0 0-1   102 0 0-1
         SC6_CU4_SC6          87.04(4)          4 0 1 0     6 0 1-1
         SC6_CU4_SC6         165.33(13)         4 0 1 0   103 0 0-1
         SC6_CU4_SC6          91.10(4)          4 0 1 0   105 0 0-1
         SC6_CU4_O7           45.77(4)          4 0 1 0     1 0 0 0
         SC6_CU4_O7           78.40(10)         4 0 1 0     3 0 1 0
         SC6_CU4_O7           96.29(18)         4 0 1 0     5 0 0-1
         SC6_CU4_O7          156.12(14)         4 0 1 0     7 0 1-1
         SC6_CU4_O7          115.35(13)         4 0 1 0    -1 0 1 0
         SC6_CU4_O7          132.33(10)         4 0 1 0    -3 0 0 0
         SC6_CU4_O7           91.20(17)         4 0 1 0    -5 0 1 1
         SC6_CU4_O7           38.38(12)         4 0 1 0    -7 0 0 1
         SC6_CU4_O8           32.46(11)         4 0 1 0     4 0 1 0
         SC6_CU4_O8           85.28(15)         4 0 1 0     7 0 1-1
         SC6_CU4_O9          132.9(9)           4 0 1 0   102 0 0-1
         SC6_CU4_SC6          91.10(4)          6 0 1-1   103 0 0-1
         SC6_CU4_SC6         165.33(13)         6 0 1-1   105 0 0-1
         SC6_CU4_O7          132.33(10)         6 0 1-1     1 0 0 0
         SC6_CU4_O7          115.35(13)         6 0 1-1     3 0 1 0
         SC6_CU4_O7           38.38(12)         6 0 1-1     5 0 0-1
         SC6_CU4_O7           91.20(17)         6 0 1-1     7 0 1-1
         SC6_CU4_O7           78.40(10)         6 0 1-1    -1 0 1 0
         SC6_CU4_O7           45.77(4)          6 0 1-1    -3 0 0 0
         SC6_CU4_O7          156.12(14)         6 0 1-1    -5 0 1 1
         SC6_CU4_O7           96.29(18)         6 0 1-1    -7 0 0 1
         SC6_CU4_O8           85.28(15)         6 0 1-1     4 0 1 0
         SC6_CU4_O8           32.46(11)         6 0 1-1     7 0 1-1
         SC6_CU4_O9           85.4(5)           6 0 1-1   102 0 0-1
         SC6_CU4_SC6          87.03(4)        103 0 0-1   105 0 0-1
         SC6_CU4_O7          132.33(10)       103 0 0-1     1 0 0 0
         SC6_CU4_O7          115.34(13)       103 0 0-1     3 0 1 0
         SC6_CU4_O7           91.20(17)       103 0 0-1     5 0 0-1
         SC6_CU4_O7           38.38(12)       103 0 0-1     7 0 1-1
         SC6_CU4_O7           78.40(10)       103 0 0-1    -1 0 1 0
         SC6_CU4_O7           45.77(4)        103 0 0-1    -3 0 0 0
         SC6_CU4_O7           96.29(18)       103 0 0-1    -5 0 1 1
         SC6_CU4_O7          156.12(14)       103 0 0-1    -7 0 0 1
1Ba3Cu3Sc3InO12                                                     DISAGL   Version MS-DOS 2000-10-12T12:06:38  Page  26


            Angle             Degrees         atom 1 loc  atom 3 loc
         SC6_CU4_O8          132.89(14)       103 0 0-1     4 0 1 0
         SC6_CU4_O8           85.36(16)       103 0 0-1     7 0 1-1
         SC6_CU4_O9           32.46(17)       103 0 0-1   102 0 0-1
         SC6_CU4_O7           45.77(4)        105 0 0-1     1 0 0 0
         SC6_CU4_O7           78.40(10)       105 0 0-1     3 0 1 0
         SC6_CU4_O7          156.12(14)       105 0 0-1     5 0 0-1
         SC6_CU4_O7           96.29(18)       105 0 0-1     7 0 1-1
         SC6_CU4_O7          115.34(13)       105 0 0-1    -1 0 1 0
         SC6_CU4_O7          132.33(10)       105 0 0-1    -3 0 0 0
         SC6_CU4_O7           38.38(12)       105 0 0-1    -5 0 1 1
         SC6_CU4_O7           91.20(17)       105 0 0-1    -7 0 0 1
         SC6_CU4_O8           85.36(16)       105 0 0-1     4 0 1 0
         SC6_CU4_O8          132.89(14)       105 0 0-1     7 0 1-1
         SC6_CU4_O9           85.28(18)       105 0 0-1   102 0 0-1
          O7_CU4_O7           68.3(5)           1 0 0 0     3 0 1 0
          O7_CU4_O7          133.98(19)         1 0 0 0     5 0 0-1
          O7_CU4_O7          133.98(19)         1 0 0 0     7 0 1-1
          O7_CU4_O7          122.62(30)         1 0 0 0    -1 0 1 0
          O7_CU4_O7          169.1(8)           1 0 0 0    -3 0 0 0
          O7_CU4_O7           53.32(35)         1 0 0 0    -5 0 1 1
          O7_CU4_O7           53.32(35)         1 0 0 0    -7 0 0 1
          O7_CU4_O8           52.33(24)         1 0 0 0     4 0 1 0
          O7_CU4_O8          119.33(34)         1 0 0 0     7 0 1-1
          O7_CU4_O9          119.3(6)           1 0 0 0   102 0 0-1
          O7_CU4_O7           80.89(9)          3 0 1 0     5 0 0-1
          O7_CU4_O7           80.89(9)          3 0 1 0     7 0 1-1
          O7_CU4_O7           54.36(32)         3 0 1 0    -1 0 1 0
          O7_CU4_O7          122.62(30)         3 0 1 0    -3 0 0 0
          O7_CU4_O7           41.32(20)         3 0 1 0    -5 0 1 1
          O7_CU4_O7           41.32(20)         3 0 1 0    -7 0 0 1
          O7_CU4_O8          108.43(11)         3 0 1 0     4 0 1 0
          O7_CU4_O8          145.21(19)         3 0 1 0     7 0 1-1
          O7_CU4_O9          145.2(6)           3 0 1 0   102 0 0-1
          O7_CU4_O7           68.63(35)         5 0 0-1     7 0 1-1
          O7_CU4_O7           41.32(20)         5 0 0-1    -1 0 1 0
          O7_CU4_O7           53.32(35)         5 0 0-1    -3 0 0 0
          O7_CU4_O7          118.52(20)         5 0 0-1    -5 0 1 1
          O7_CU4_O7           80.91(27)         5 0 0-1    -7 0 0 1
          O7_CU4_O8          112.60(30)         5 0 0-1     4 0 1 0
          O7_CU4_O8           70.53(16)         5 0 0-1     7 0 1-1
          O7_CU4_O9          105.6(4)           5 0 0-1   102 0 0-1
          O7_CU4_O7           41.32(20)         7 0 1-1    -1 0 1 0
          O7_CU4_O7           53.32(35)         7 0 1-1    -3 0 0 0
          O7_CU4_O7           80.90(27)         7 0 1-1    -5 0 1 1
          O7_CU4_O7          118.52(20)         7 0 1-1    -7 0 0 1
          O7_CU4_O8          170.67(10)         7 0 1-1     4 0 1 0
          O7_CU4_O8          105.62(18)         7 0 1-1     7 0 1-1
          O7_CU4_O9           70.53(21)         7 0 1-1   102 0 0-1
          O7_CU4_O7           68.3(5)          -1 0 1 0    -3 0 0 0
          O7_CU4_O7           80.89(9)         -1 0 1 0    -5 0 1 1
          O7_CU4_O7           80.89(9)         -1 0 1 0    -7 0 0 1
          O7_CU4_O8          145.21(19)        -1 0 1 0     4 0 1 0
          O7_CU4_O8          108.43(11)        -1 0 1 0     7 0 1-1
          O7_CU4_O9          108.42(31)        -1 0 1 0   102 0 0-1
          O7_CU4_O7          133.98(19)        -3 0 0 0    -5 0 1 1
          O7_CU4_O7          133.98(19)        -3 0 0 0    -7 0 0 1
1Ba3Cu3Sc3InO12                                                     DISAGL   Version MS-DOS 2000-10-12T12:06:38  Page  27


            Angle             Degrees         atom 1 loc  atom 3 loc
          O7_CU4_O8          119.33(34)        -3 0 0 0     4 0 1 0
          O7_CU4_O8           52.33(24)        -3 0 0 0     7 0 1-1
          O7_CU4_O9           52.3(4)          -3 0 0 0   102 0 0-1
          O7_CU4_O7           68.63(35)        -5 0 1 1    -7 0 0 1
          O7_CU4_O8          105.62(18)        -5 0 1 1     4 0 1 0
          O7_CU4_O8          170.67(10)        -5 0 1 1     7 0 1-1
          O7_CU4_O9          112.60(26)        -5 0 1 1   102 0 0-1
          O7_CU4_O8           70.53(16)        -7 0 0 1     4 0 1 0
          O7_CU4_O8          112.60(30)        -7 0 0 1     7 0 1-1
          O7_CU4_O9          170.7(33)         -7 0 0 1   102 0 0-1
          O8_CU4_O8           67.15(15)         4 0 1 0     7 0 1-1
          O8_CU4_O9          100.5(6)           4 0 1 0   102 0 0-1
          O8_CU4_O9           64.6(5)           7 0 1-1   102 0 0-1

       Vector         Length           Optr Cell        Neighbor atom coordinates
      IN5_BA1         3.5755(16)         1 0 0 0      .00000    .00000    .00000
      IN5_BA1         3.5755(16)         5 0 0 0      .00000    .00000    .50000
      IN5_BA2         3.4166(7)          1 0-1 0      .27777   -.22223    .00000
      IN5_BA2         3.9384(10)         2 1 0 0      .22223    .27777    .00000
      IN5_BA2         3.9384(10)         6 1 0 0      .22223   -.27777    .50000
      IN5_BA2         3.4166(7)          7 0 1 0      .27777    .22223    .50000
      IN5_CU3         3.0865(20)         1 0 0 0      .50000    .00000    .25000
      IN5_CU4         3.0574(12)         2 1 0 0      .39397    .10603    .00000
      IN5_CU4         3.0574(12)         6 1 0 0      .39397   -.10603    .50000
      IN5_IN5         4.0870(29)         2 0 0 0      .00000    .24178    .25000
      IN5_IN5         4.0870(29)         4 0 0 0      .00000   -.24178    .25000
      IN5_IN5         4.21053(13)        7 0 0-1      .24178    .00000   -.25000
      IN5_IN5         4.21053(13)        7 0 0 0      .24178    .00000    .75000
      IN5_IN5         4.3650(29)       106 0 0-1      .50000    .25822    .25000
      IN5_IN5         4.3650(29)       108 0-1-1      .50000   -.25822    .25000
      IN5_SC6         4.0870(29)         2 0 0 0      .00000    .24178    .25000
      IN5_SC6         4.0870(29)         4 0 0 0      .00000   -.24178    .25000
      IN5_SC6         4.21053(13)        7 0 0-1      .24178    .00000   -.25000
      IN5_SC6         4.21053(13)        7 0 0 0      .24178    .00000    .75000
      IN5_SC6         4.3650(29)       106 0 0-1      .50000    .25822    .25000
      IN5_SC6         4.3650(29)       108 0-1-1      .50000   -.25822    .25000
      IN5_O7          2.1987(20)         2 1 0 0      .38306    .11694    .22983
      IN5_O7          2.1987(20)        -8 1 0 1      .38306   -.11694    .27017
      IN5_O8          2.0489(16)         1 0 0 0      .12966    .12966    .25000
      IN5_O8          2.0489(16)         4 0 0 0      .12966   -.12966    .25000
     *IN5_O9          2.1140(15)       103 0 0 0      .25780   -.00049    .50000
     *IN5_O9          2.1140(15)       105 0-1-1      .25780    .00049    .00000
 **** More than 24 Interatomic distances found ****
 Angles will be calculated between the first 25

            Angle             Degrees         atom 1 loc  atom 3 loc
         BA1_IN5_BA1          72.15(4)          1 0 0 0     5 0 0 0
         BA1_IN5_BA2          74.869(21)        1 0 0 0     1 0-1 0
         BA1_IN5_BA2          68.734(19)        1 0 0 0     2 1 0 0
         BA1_IN5_BA2         105.47(4)          1 0 0 0     6 1 0 0
         BA1_IN5_BA2         117.69(4)          1 0 0 0     7 0 1 0
         BA1_IN5_CU3         143.927(19)        1 0 0 0     1 0 0 0
         BA1_IN5_CU4          94.33(4)          1 0 0 0     2 1 0 0
         BA1_IN5_CU4         152.42(7)          1 0 0 0     6 1 0 0
         BA1_IN5_IN5          55.143(10)        1 0 0 0     2 0 0 0
         BA1_IN5_IN5          55.143(10)        1 0 0 0     4 0 0 0
1Ba3Cu3Sc3InO12                                                     DISAGL   Version MS-DOS 2000-10-12T12:06:39  Page  28


            Angle             Degrees         atom 1 loc  atom 3 loc
         BA1_IN5_IN5          53.927(19)        1 0 0 0     7 0 0-1
         BA1_IN5_IN5         126.073(19)        1 0 0 0     7 0 0 0
         BA1_IN5_IN5         124.857(10)        1 0 0 0   106 0 0-1
         BA1_IN5_IN5         124.857(10)        1 0 0 0   108 0-1-1
         BA1_IN5_SC6          55.143(10)        1 0 0 0     2 0 0 0
         BA1_IN5_SC6          55.143(10)        1 0 0 0     4 0 0 0
         BA1_IN5_SC6          53.927(19)        1 0 0 0     7 0 0-1
         BA1_IN5_SC6         126.073(19)        1 0 0 0     7 0 0 0
         BA1_IN5_SC6         124.857(10)        1 0 0 0   106 0 0-1
         BA1_IN5_SC6         124.857(10)        1 0 0 0   108 0-1-1
         BA1_IN5_O7          125.12(32)         1 0 0 0     2 1 0 0
         BA1_IN5_O7          131.78(26)         1 0 0 0    -8 1 0 1
         BA1_IN5_O8           58.08(28)         1 0 0 0     1 0 0 0
         BA1_IN5_O9           58.08(26)         1 0 0 0     4 0 0 0
         BA1_IN5_BA2         117.69(4)          5 0 0 0     1 0-1 0
         BA1_IN5_BA2         105.47(4)          5 0 0 0     2 1 0 0
         BA1_IN5_BA2          68.734(19)        5 0 0 0     6 1 0 0
         BA1_IN5_BA2          74.869(21)        5 0 0 0     7 0 1 0
         BA1_IN5_CU3         143.927(19)        5 0 0 0     1 0 0 0
         BA1_IN5_CU4         152.42(7)          5 0 0 0     2 1 0 0
         BA1_IN5_CU4          94.33(4)          5 0 0 0     6 1 0 0
         BA1_IN5_IN5          55.143(10)        5 0 0 0     2 0 0 0
         BA1_IN5_IN5          55.143(10)        5 0 0 0     4 0 0 0
         BA1_IN5_IN5         126.073(19)        5 0 0 0     7 0 0-1
         BA1_IN5_IN5          53.927(19)        5 0 0 0     7 0 0 0
         BA1_IN5_IN5         124.857(10)        5 0 0 0   106 0 0-1
         BA1_IN5_IN5         124.857(10)        5 0 0 0   108 0-1-1
         BA1_IN5_SC6          55.143(10)        5 0 0 0     2 0 0 0
         BA1_IN5_SC6          55.143(10)        5 0 0 0     4 0 0 0
         BA1_IN5_SC6         126.073(19)        5 0 0 0     7 0 0-1
         BA1_IN5_SC6          53.927(19)        5 0 0 0     7 0 0 0
         BA1_IN5_SC6         124.857(10)        5 0 0 0   106 0 0-1
         BA1_IN5_SC6         124.857(10)        5 0 0 0   108 0-1-1
         BA1_IN5_O7          131.78(26)         5 0 0 0     2 1 0 0
         BA1_IN5_O7          125.12(32)         5 0 0 0    -8 1 0 1
         BA1_IN5_O8           58.08(28)         5 0 0 0     1 0 0 0
         BA1_IN5_O9           58.08(26)         5 0 0 0     4 0 0 0
         BA2_IN5_BA2         109.483(3)         1 0-1 0     2 1 0 0
         BA2_IN5_BA2          71.423(7)         1 0-1 0     6 1 0 0
         BA2_IN5_BA2         165.53(8)          1 0-1 0     7 0 1 0
         BA2_IN5_CU3          82.77(4)          1 0-1 0     1 0 0 0
         BA2_IN5_CU4          79.81(5)          1 0-1 0     2 1 0 0
         BA2_IN5_CU4          91.55(4)          1 0-1 0     6 1 0 0
         BA2_IN5_IN5         129.703(29)        1 0-1 0     2 0 0 0
         BA2_IN5_IN5          62.57(4)          1 0-1 0     4 0 0 0
         BA2_IN5_IN5          51.962(10)        1 0-1 0     7 0 0-1
         BA2_IN5_IN5         128.038(10)        1 0-1 0     7 0 0 0
         BA2_IN5_IN5         117.43(4)          1 0-1 0   106 0 0-1
         BA2_IN5_IN5          50.297(29)        1 0-1 0   108 0-1-1
         BA2_IN5_SC6         129.703(29)        1 0-1 0     2 0 0 0
         BA2_IN5_SC6          62.57(4)          1 0-1 0     4 0 0 0
         BA2_IN5_SC6          51.962(10)        1 0-1 0     7 0 0-1
         BA2_IN5_SC6         128.038(10)        1 0-1 0     7 0 0 0
         BA2_IN5_SC6         117.43(4)          1 0-1 0   106 0 0-1
         BA2_IN5_SC6          50.297(29)        1 0-1 0   108 0-1-1
         BA2_IN5_O7          110.48(27)         1 0-1 0     2 1 0 0
1Ba3Cu3Sc3InO12                                                     DISAGL   Version MS-DOS 2000-10-12T12:06:39  Page  29


            Angle             Degrees         atom 1 loc  atom 3 loc
         BA2_IN5_O7           57.09(25)         1 0-1 0    -8 1 0 1
         BA2_IN5_O8          132.10(22)         1 0-1 0     1 0 0 0
         BA2_IN5_O9           59.62(30)         1 0-1 0     4 0 0 0
         BA2_IN5_BA2         173.20(7)          2 1 0 0     6 1 0 0
         BA2_IN5_BA2          71.423(7)         2 1 0 0     7 0 1 0
         BA2_IN5_CU3          93.401(33)        2 1 0 0     1 0 0 0
         BA2_IN5_CU4          46.98(7)          2 1 0 0     2 1 0 0
         BA2_IN5_CU4         138.84(7)          2 1 0 0     6 1 0 0
         BA2_IN5_IN5          50.351(31)        2 1 0 0     2 0 0 0
         BA2_IN5_IN5         123.654(28)        2 1 0 0     4 0 0 0
         BA2_IN5_IN5          57.686(9)         2 1 0 0     7 0 0-1
         BA2_IN5_IN5         122.314(9)         2 1 0 0     7 0 0 0
         BA2_IN5_IN5          56.346(28)        2 1 0 0   106 0 0-1
         BA2_IN5_IN5         129.649(31)        2 1 0 0   108 0-1-1
         BA2_IN5_SC6          50.351(31)        2 1 0 0     2 0 0 0
         BA2_IN5_SC6         123.654(28)        2 1 0 0     4 0 0 0
         BA2_IN5_SC6          57.686(9)         2 1 0 0     7 0 0-1
         BA2_IN5_SC6         122.314(9)         2 1 0 0     7 0 0 0
         BA2_IN5_SC6          56.346(28)        2 1 0 0   106 0 0-1
         BA2_IN5_SC6         129.649(31)        2 1 0 0   108 0-1-1
         BA2_IN5_O7           57.88(34)         2 1 0 0     2 1 0 0
         BA2_IN5_O7          128.52(34)         2 1 0 0    -8 1 0 1
         BA2_IN5_O8           47.43(26)         2 1 0 0     1 0 0 0
         BA2_IN5_O9          126.8(4)           2 1 0 0     4 0 0 0
         BA2_IN5_BA2         109.483(3)         6 1 0 0     7 0 1 0
         BA2_IN5_CU3          93.401(33)        6 1 0 0     1 0 0 0
         BA2_IN5_CU4         138.84(7)          6 1 0 0     2 1 0 0
         BA2_IN5_CU4          46.98(7)          6 1 0 0     6 1 0 0
         BA2_IN5_IN5         123.654(28)        6 1 0 0     2 0 0 0
         BA2_IN5_IN5          50.351(31)        6 1 0 0     4 0 0 0
         BA2_IN5_IN5         122.314(9)         6 1 0 0     7 0 0-1
         BA2_IN5_IN5          57.686(9)         6 1 0 0     7 0 0 0
         BA2_IN5_IN5         129.649(31)        6 1 0 0   106 0 0-1
         BA2_IN5_IN5          56.346(28)        6 1 0 0   108 0-1-1
         BA2_IN5_SC6         123.654(28)        6 1 0 0     2 0 0 0
         BA2_IN5_SC6          50.351(31)        6 1 0 0     4 0 0 0
         BA2_IN5_SC6         122.314(9)         6 1 0 0     7 0 0-1
         BA2_IN5_SC6          57.686(9)         6 1 0 0     7 0 0 0
         BA2_IN5_SC6         129.649(31)        6 1 0 0   106 0 0-1
         BA2_IN5_SC6          56.346(28)        6 1 0 0   108 0-1-1
         BA2_IN5_O7          128.52(34)         6 1 0 0     2 1 0 0
         BA2_IN5_O7           57.88(34)         6 1 0 0    -8 1 0 1
         BA2_IN5_O8          126.79(29)         6 1 0 0     1 0 0 0
         BA2_IN5_O9           47.43(22)         6 1 0 0     4 0 0 0
         BA2_IN5_CU3          82.77(4)          7 0 1 0     1 0 0 0
         BA2_IN5_CU4          91.55(4)          7 0 1 0     2 1 0 0
         BA2_IN5_CU4          79.81(5)          7 0 1 0     6 1 0 0
         BA2_IN5_IN5          62.57(4)          7 0 1 0     2 0 0 0
         BA2_IN5_IN5         129.703(29)        7 0 1 0     4 0 0 0
         BA2_IN5_IN5         128.038(10)        7 0 1 0     7 0 0-1
         BA2_IN5_IN5          51.962(10)        7 0 1 0     7 0 0 0
         BA2_IN5_IN5          50.297(29)        7 0 1 0   106 0 0-1
         BA2_IN5_IN5         117.43(4)          7 0 1 0   108 0-1-1
         BA2_IN5_SC6          62.57(4)          7 0 1 0     2 0 0 0
         BA2_IN5_SC6         129.703(29)        7 0 1 0     4 0 0 0
         BA2_IN5_SC6         128.038(10)        7 0 1 0     7 0 0-1
1Ba3Cu3Sc3InO12                                                     DISAGL   Version MS-DOS 2000-10-12T12:06:39  Page  30


            Angle             Degrees         atom 1 loc  atom 3 loc
         BA2_IN5_SC6          51.962(10)        7 0 1 0     7 0 0 0
         BA2_IN5_SC6          50.297(29)        7 0 1 0   106 0 0-1
         BA2_IN5_SC6         117.43(4)          7 0 1 0   108 0-1-1
         BA2_IN5_O7           57.09(25)         7 0 1 0     2 1 0 0
         BA2_IN5_O7          110.48(27)         7 0 1 0    -8 1 0 1
         BA2_IN5_O8           59.62(27)         7 0 1 0     1 0 0 0
         BA2_IN5_O9          132.1(5)           7 0 1 0     4 0 0 0
         CU3_IN5_CU4          53.49(5)          1 0 0 0     2 1 0 0
         CU3_IN5_CU4          53.49(5)          1 0 0 0     6 1 0 0
         CU3_IN5_IN5         135.000(0)         1 0 0 0     2 0 0 0
         CU3_IN5_IN5         135.000(0)         1 0 0 0     4 0 0 0
         CU3_IN5_IN5          90.000(0)         1 0 0 0     7 0 0-1
         CU3_IN5_IN5          90.000(0)         1 0 0 0     7 0 0 0
         CU3_IN5_IN5          45.000(0)         1 0 0 0   106 0 0-1
         CU3_IN5_IN5          45.000(0)         1 0 0 0   108 0-1-1
         CU3_IN5_SC6         135.000(0)         1 0 0 0     2 0 0 0
         CU3_IN5_SC6         135.000(0)         1 0 0 0     4 0 0 0
         CU3_IN5_SC6          90.000(0)         1 0 0 0     7 0 0-1
         CU3_IN5_SC6          90.000(0)         1 0 0 0     7 0 0 0
         CU3_IN5_SC6          45.000(0)         1 0 0 0   106 0 0-1
         CU3_IN5_SC6          45.000(0)         1 0 0 0   108 0-1-1
         CU3_IN5_O7           39.82(34)         1 0 0 0     2 1 0 0
         CU3_IN5_O7           39.82(34)         1 0 0 0    -8 1 0 1
         CU3_IN5_O8          130.9(4)           1 0 0 0     1 0 0 0
         CU3_IN5_O9          130.9(10)          1 0 0 0     4 0 0 0
         CU4_IN5_CU4         106.97(11)         2 1 0 0     6 1 0 0
         CU4_IN5_IN5          97.33(6)          2 1 0 0     2 0 0 0
         CU4_IN5_IN5         135.548(18)        2 1 0 0     4 0 0 0
         CU4_IN5_IN5          46.482(22)        2 1 0 0     7 0 0-1
         CU4_IN5_IN5         133.518(22)        2 1 0 0     7 0 0 0
         CU4_IN5_IN5          44.452(18)        2 1 0 0   106 0 0-1
         CU4_IN5_IN5          82.67(6)          2 1 0 0   108 0-1-1
         CU4_IN5_SC6          97.33(6)          2 1 0 0     2 0 0 0
         CU4_IN5_SC6         135.548(18)        2 1 0 0     4 0 0 0
         CU4_IN5_SC6          46.482(22)        2 1 0 0     7 0 0-1
         CU4_IN5_SC6         133.518(22)        2 1 0 0     7 0 0 0
         CU4_IN5_SC6          44.452(18)        2 1 0 0   106 0 0-1
         CU4_IN5_SC6          82.67(6)          2 1 0 0   108 0-1-1
         CU4_IN5_O7           39.31(24)         2 1 0 0     2 1 0 0
         CU4_IN5_O7           81.93(35)         2 1 0 0    -8 1 0 1
         CU4_IN5_O8           94.34(28)         2 1 0 0     1 0 0 0
         CU4_IN5_O9          134.6(8)           2 1 0 0     4 0 0 0
         CU4_IN5_IN5         135.548(18)        6 1 0 0     2 0 0 0
         CU4_IN5_IN5          97.33(6)          6 1 0 0     4 0 0 0
         CU4_IN5_IN5         133.518(22)        6 1 0 0     7 0 0-1
         CU4_IN5_IN5          46.482(22)        6 1 0 0     7 0 0 0
         CU4_IN5_IN5          82.67(6)          6 1 0 0   106 0 0-1
         CU4_IN5_IN5          44.452(18)        6 1 0 0   108 0-1-1
         CU4_IN5_SC6         135.548(18)        6 1 0 0     2 0 0 0
         CU4_IN5_SC6          97.33(6)          6 1 0 0     4 0 0 0
         CU4_IN5_SC6         133.518(22)        6 1 0 0     7 0 0-1
         CU4_IN5_SC6          46.482(22)        6 1 0 0     7 0 0 0
         CU4_IN5_SC6          82.67(6)          6 1 0 0   106 0 0-1
         CU4_IN5_SC6          44.452(18)        6 1 0 0   108 0-1-1
         CU4_IN5_O7           81.93(35)         6 1 0 0     2 1 0 0
         CU4_IN5_O7           39.31(24)         6 1 0 0    -8 1 0 1
1Ba3Cu3Sc3InO12                                                     DISAGL   Version MS-DOS 2000-10-12T12:06:39  Page  31


            Angle             Degrees         atom 1 loc  atom 3 loc
         CU4_IN5_O8          134.65(10)         6 1 0 0     1 0 0 0
         CU4_IN5_O9           94.3(5)           6 1 0 0     4 0 0 0
         IN5_IN5_IN5          90.000(0)         2 0 0 0     4 0 0 0
         IN5_IN5_IN5          90.000(0)         2 0 0 0     7 0 0-1
         IN5_IN5_IN5          90.000(0)         2 0 0 0     7 0 0 0
         IN5_IN5_IN5          90.000(0)         2 0 0 0   106 0 0-1
         IN5_IN5_IN5         179.972(0)         2 0 0 0   108 0-1-1
         IN5_IN5_SC6            .000(0)         2 0 0 0     2 0 0 0
         IN5_IN5_SC6          90.000(0)         2 0 0 0     4 0 0 0
         IN5_IN5_SC6          90.000(0)         2 0 0 0     7 0 0-1
         IN5_IN5_SC6          90.000(0)         2 0 0 0     7 0 0 0
         IN5_IN5_SC6          90.000(0)         2 0 0 0   106 0 0-1
         IN5_IN5_SC6         179.972(0)         2 0 0 0   108 0-1-1
         IN5_IN5_O7           95.37(34)         2 0 0 0     2 1 0 0
         IN5_IN5_O7          173.03(27)         2 0 0 0    -8 1 0 1
         IN5_IN5_O8            4.1(4)           2 0 0 0     1 0 0 0
         IN5_IN5_O9           94.15(27)         2 0 0 0     4 0 0 0
         IN5_IN5_IN5          90.000(0)         4 0 0 0     7 0 0-1
         IN5_IN5_IN5          90.000(0)         4 0 0 0     7 0 0 0
         IN5_IN5_IN5         179.972(0)         4 0 0 0   106 0 0-1
         IN5_IN5_IN5          90.000(0)         4 0 0 0   108 0-1-1
         IN5_IN5_SC6          90.000(0)         4 0 0 0     2 0 0 0
         IN5_IN5_SC6            .000(0)         4 0 0 0     4 0 0 0
         IN5_IN5_SC6          90.000(0)         4 0 0 0     7 0 0-1
         IN5_IN5_SC6          90.000(0)         4 0 0 0     7 0 0 0
         IN5_IN5_SC6         179.972(0)         4 0 0 0   106 0 0-1
         IN5_IN5_SC6          90.000(0)         4 0 0 0   108 0-1-1
         IN5_IN5_O7          173.03(27)         4 0 0 0     2 1 0 0
         IN5_IN5_O7           95.37(34)         4 0 0 0    -8 1 0 1
         IN5_IN5_O8           94.1(4)           4 0 0 0     1 0 0 0
         IN5_IN5_O9            4.1(30)          4 0 0 0     4 0 0 0
         IN5_IN5_IN5         180.000(0)         7 0 0-1     7 0 0 0
         IN5_IN5_IN5          90.000(0)         7 0 0-1   106 0 0-1
         IN5_IN5_IN5          90.000(0)         7 0 0-1   108 0-1-1
         IN5_IN5_SC6          90.000(0)         7 0 0-1     2 0 0 0
         IN5_IN5_SC6          90.000(0)         7 0 0-1     4 0 0 0
         IN5_IN5_SC6            .000(0)         7 0 0-1     7 0 0-1
         IN5_IN5_SC6         180.000(0)         7 0 0-1     7 0 0 0
         IN5_IN5_SC6          90.000(0)         7 0 0-1   106 0 0-1
         IN5_IN5_SC6          90.000(0)         7 0 0-1   108 0-1-1
         IN5_IN5_O7           85.57(25)         7 0 0-1     2 1 0 0
         IN5_IN5_O7           94.43(25)         7 0 0-1    -8 1 0 1
         IN5_IN5_O8           90.000(0)         7 0 0-1     1 0 0 0
         IN5_IN5_O9           90.00(19)         7 0 0-1     4 0 0 0
         IN5_IN5_IN5          90.000(0)         7 0 0 0   106 0 0-1
         IN5_IN5_IN5          90.000(0)         7 0 0 0   108 0-1-1
         IN5_IN5_SC6          90.000(0)         7 0 0 0     2 0 0 0
         IN5_IN5_SC6          90.000(0)         7 0 0 0     4 0 0 0
         IN5_IN5_SC6         180.000(0)         7 0 0 0     7 0 0-1
         IN5_IN5_SC6            .000(0)         7 0 0 0     7 0 0 0
         IN5_IN5_SC6          90.000(0)         7 0 0 0   106 0 0-1
         IN5_IN5_SC6          90.000(0)         7 0 0 0   108 0-1-1
         IN5_IN5_O7           94.43(25)         7 0 0 0     2 1 0 0
         IN5_IN5_O7           85.57(25)         7 0 0 0    -8 1 0 1
         IN5_IN5_O8           90.000(0)         7 0 0 0     1 0 0 0
         IN5_IN5_O9           90.00(19)         7 0 0 0     4 0 0 0
1Ba3Cu3Sc3InO12                                                     DISAGL   Version MS-DOS 2000-10-12T12:06:39  Page  32


            Angle             Degrees         atom 1 loc  atom 3 loc
         IN5_IN5_IN5          90.000(0)       106 0 0-1   108 0-1-1
         IN5_IN5_SC6          90.000(0)       106 0 0-1     2 0 0 0
         IN5_IN5_SC6         179.972(0)       106 0 0-1     4 0 0 0
         IN5_IN5_SC6          90.000(0)       106 0 0-1     7 0 0-1
         IN5_IN5_SC6          90.000(0)       106 0 0-1     7 0 0 0
         IN5_IN5_SC6            .000(0)       106 0 0-1   106 0 0-1
         IN5_IN5_SC6          90.000(0)       106 0 0-1   108 0-1-1
         IN5_IN5_O7            6.97(27)       106 0 0-1     2 1 0 0
         IN5_IN5_O7           84.63(34)       106 0 0-1    -8 1 0 1
         IN5_IN5_O8           85.9(4)         106 0 0-1     1 0 0 0
         IN5_IN5_O9          176.(8)          106 0 0-1     4 0 0 0
         IN5_IN5_SC6         179.972(0)       108 0-1-1     2 0 0 0
         IN5_IN5_SC6          90.000(0)       108 0-1-1     4 0 0 0
         IN5_IN5_SC6          90.000(0)       108 0-1-1     7 0 0-1
         IN5_IN5_SC6          90.000(0)       108 0-1-1     7 0 0 0
         IN5_IN5_SC6          90.000(0)       108 0-1-1   106 0 0-1
         IN5_IN5_SC6            .000(0)       108 0-1-1   108 0-1-1
         IN5_IN5_O7           84.63(34)       108 0-1-1     2 1 0 0
         IN5_IN5_O7            6.97(27)       108 0-1-1    -8 1 0 1
         IN5_IN5_O8          175.9(4)         108 0-1-1     1 0 0 0
         IN5_IN5_O9           85.9(5)         108 0-1-1     4 0 0 0
         SC6_IN5_SC6          90.000(0)         2 0 0 0     4 0 0 0
         SC6_IN5_SC6          90.000(0)         2 0 0 0     7 0 0-1
         SC6_IN5_SC6          90.000(0)         2 0 0 0     7 0 0 0
         SC6_IN5_SC6          90.000(0)         2 0 0 0   106 0 0-1
         SC6_IN5_SC6         179.972(0)         2 0 0 0   108 0-1-1
         SC6_IN5_O7           95.37(34)         2 0 0 0     2 1 0 0
         SC6_IN5_O7          173.03(27)         2 0 0 0    -8 1 0 1
         SC6_IN5_O8            4.1(4)           2 0 0 0     1 0 0 0
         SC6_IN5_O9           94.15(27)         2 0 0 0     4 0 0 0
         SC6_IN5_SC6          90.000(0)         4 0 0 0     7 0 0-1
         SC6_IN5_SC6          90.000(0)         4 0 0 0     7 0 0 0
         SC6_IN5_SC6         179.972(0)         4 0 0 0   106 0 0-1
         SC6_IN5_SC6          90.000(0)         4 0 0 0   108 0-1-1
         SC6_IN5_O7          173.03(27)         4 0 0 0     2 1 0 0
         SC6_IN5_O7           95.37(34)         4 0 0 0    -8 1 0 1
         SC6_IN5_O8           94.1(4)           4 0 0 0     1 0 0 0
         SC6_IN5_O9            4.1(30)          4 0 0 0     4 0 0 0
         SC6_IN5_SC6         180.000(0)         7 0 0-1     7 0 0 0
         SC6_IN5_SC6          90.000(0)         7 0 0-1   106 0 0-1
         SC6_IN5_SC6          90.000(0)         7 0 0-1   108 0-1-1
         SC6_IN5_O7           85.57(25)         7 0 0-1     2 1 0 0
         SC6_IN5_O7           94.43(25)         7 0 0-1    -8 1 0 1
         SC6_IN5_O8           90.000(0)         7 0 0-1     1 0 0 0
         SC6_IN5_O9           90.00(19)         7 0 0-1     4 0 0 0
         SC6_IN5_SC6          90.000(0)         7 0 0 0   106 0 0-1
         SC6_IN5_SC6          90.000(0)         7 0 0 0   108 0-1-1
         SC6_IN5_O7           94.43(25)         7 0 0 0     2 1 0 0
         SC6_IN5_O7           85.57(25)         7 0 0 0    -8 1 0 1
         SC6_IN5_O8           90.000(0)         7 0 0 0     1 0 0 0
         SC6_IN5_O9           90.00(19)         7 0 0 0     4 0 0 0
         SC6_IN5_SC6          90.000(0)       106 0 0-1   108 0-1-1
         SC6_IN5_O7            6.97(27)       106 0 0-1     2 1 0 0
         SC6_IN5_O7           84.63(34)       106 0 0-1    -8 1 0 1
         SC6_IN5_O8           85.9(4)         106 0 0-1     1 0 0 0
         SC6_IN5_O9          176.(8)          106 0 0-1     4 0 0 0
1Ba3Cu3Sc3InO12                                                     DISAGL   Version MS-DOS 2000-10-12T12:06:39  Page  33


            Angle             Degrees         atom 1 loc  atom 3 loc
         SC6_IN5_O7           84.63(34)       108 0-1-1     2 1 0 0
         SC6_IN5_O7            6.97(27)       108 0-1-1    -8 1 0 1
         SC6_IN5_O8          175.9(4)         108 0-1-1     1 0 0 0
         SC6_IN5_O9           85.9(5)         108 0-1-1     4 0 0 0
          O7_IN5_O7           79.6(7)           2 1 0 0    -8 1 0 1
          O7_IN5_O8           91.23(34)         2 1 0 0     1 0 0 0
          O7_IN5_O9          169.(4)            2 1 0 0     4 0 0 0
          O7_IN5_O8          169.5(6)          -8 1 0 1     1 0 0 0
          O7_IN5_O9           91.2(9)          -8 1 0 1     4 0 0 0
          O8_IN5_O9           98.3(5)           1 0 0 0     4 0 0 0

       Vector         Length           Optr Cell        Neighbor atom coordinates
      SC6_BA1         3.5755(16)         1 0 0 0      .00000    .00000    .00000
      SC6_BA1         3.5755(16)         5 0 0 0      .00000    .00000    .50000
      SC6_BA2         3.4166(7)          1 0-1 0      .27777   -.22223    .00000
      SC6_BA2         3.9384(10)         2 1 0 0      .22223    .27777    .00000
      SC6_BA2         3.9384(10)         6 1 0 0      .22223   -.27777    .50000
      SC6_BA2         3.4166(7)          7 0 1 0      .27777    .22223    .50000
      SC6_CU3         3.0865(20)         1 0 0 0      .50000    .00000    .25000
      SC6_CU4         3.0574(12)         2 1 0 0      .39397    .10603    .00000
      SC6_CU4         3.0574(12)         6 1 0 0      .39397   -.10603    .50000
      SC6_IN5         4.0870(29)         2 0 0 0      .00000    .24178    .25000
      SC6_IN5         4.0870(29)         4 0 0 0      .00000   -.24178    .25000
      SC6_IN5         4.21053(13)        7 0 0-1      .24178    .00000   -.25000
      SC6_IN5         4.21053(13)        7 0 0 0      .24178    .00000    .75000
      SC6_IN5         4.3650(29)       106 0 0-1      .50000    .25822    .25000
      SC6_IN5         4.3650(29)       108 0-1-1      .50000   -.25822    .25000
      SC6_SC6         4.0870(29)         2 0 0 0      .00000    .24178    .25000
      SC6_SC6         4.0870(29)         4 0 0 0      .00000   -.24178    .25000
      SC6_SC6         4.21053(13)        7 0 0-1      .24178    .00000   -.25000
      SC6_SC6         4.21053(13)        7 0 0 0      .24178    .00000    .75000
      SC6_SC6         4.3650(29)       106 0 0-1      .50000    .25822    .25000
      SC6_SC6         4.3650(29)       108 0-1-1      .50000   -.25822    .25000
      SC6_O7          2.1987(20)         2 1 0 0      .38306    .11694    .22983
      SC6_O7          2.1987(20)        -8 1 0 1      .38306   -.11694    .27017
      SC6_O8          2.0489(16)         1 0 0 0      .12966    .12966    .25000
      SC6_O8          2.0489(16)         4 0 0 0      .12966   -.12966    .25000
     *SC6_O9          2.1140(15)       103 0 0 0      .25780   -.00049    .50000
     *SC6_O9          2.1140(15)       105 0-1-1      .25780    .00049    .00000
 **** More than 24 Interatomic distances found ****
 Angles will be calculated between the first 25

            Angle             Degrees         atom 1 loc  atom 3 loc
         BA1_SC6_BA1          72.15(4)          1 0 0 0     5 0 0 0
         BA1_SC6_BA2          74.869(21)        1 0 0 0     1 0-1 0
         BA1_SC6_BA2          68.734(19)        1 0 0 0     2 1 0 0
         BA1_SC6_BA2         105.47(4)          1 0 0 0     6 1 0 0
         BA1_SC6_BA2         117.69(4)          1 0 0 0     7 0 1 0
         BA1_SC6_CU3         143.927(19)        1 0 0 0     1 0 0 0
         BA1_SC6_CU4          94.33(4)          1 0 0 0     2 1 0 0
         BA1_SC6_CU4         152.42(7)          1 0 0 0     6 1 0 0
         BA1_SC6_IN5          55.143(10)        1 0 0 0     2 0 0 0
         BA1_SC6_IN5          55.143(10)        1 0 0 0     4 0 0 0
         BA1_SC6_IN5          53.927(19)        1 0 0 0     7 0 0-1
         BA1_SC6_IN5         126.073(19)        1 0 0 0     7 0 0 0
         BA1_SC6_IN5         124.857(10)        1 0 0 0   106 0 0-1
1Ba3Cu3Sc3InO12                                                     DISAGL   Version MS-DOS 2000-10-12T12:06:39  Page  34


            Angle             Degrees         atom 1 loc  atom 3 loc
         BA1_SC6_IN5         124.857(10)        1 0 0 0   108 0-1-1
         BA1_SC6_SC6          55.143(10)        1 0 0 0     2 0 0 0
         BA1_SC6_SC6          55.143(10)        1 0 0 0     4 0 0 0
         BA1_SC6_SC6          53.927(19)        1 0 0 0     7 0 0-1
         BA1_SC6_SC6         126.073(19)        1 0 0 0     7 0 0 0
         BA1_SC6_SC6         124.857(10)        1 0 0 0   106 0 0-1
         BA1_SC6_SC6         124.857(10)        1 0 0 0   108 0-1-1
         BA1_SC6_O7          125.12(32)         1 0 0 0     2 1 0 0
         BA1_SC6_O7          131.78(26)         1 0 0 0    -8 1 0 1
         BA1_SC6_O8           58.08(28)         1 0 0 0     1 0 0 0
         BA1_SC6_O9           58.08(26)         1 0 0 0     4 0 0 0
         BA1_SC6_BA2         117.69(4)          5 0 0 0     1 0-1 0
         BA1_SC6_BA2         105.47(4)          5 0 0 0     2 1 0 0
         BA1_SC6_BA2          68.734(19)        5 0 0 0     6 1 0 0
         BA1_SC6_BA2          74.869(21)        5 0 0 0     7 0 1 0
         BA1_SC6_CU3         143.927(19)        5 0 0 0     1 0 0 0
         BA1_SC6_CU4         152.42(7)          5 0 0 0     2 1 0 0
         BA1_SC6_CU4          94.33(4)          5 0 0 0     6 1 0 0
         BA1_SC6_IN5          55.143(10)        5 0 0 0     2 0 0 0
         BA1_SC6_IN5          55.143(10)        5 0 0 0     4 0 0 0
         BA1_SC6_IN5         126.073(19)        5 0 0 0     7 0 0-1
         BA1_SC6_IN5          53.927(19)        5 0 0 0     7 0 0 0
         BA1_SC6_IN5         124.857(10)        5 0 0 0   106 0 0-1
         BA1_SC6_IN5         124.857(10)        5 0 0 0   108 0-1-1
         BA1_SC6_SC6          55.143(10)        5 0 0 0     2 0 0 0
         BA1_SC6_SC6          55.143(10)        5 0 0 0     4 0 0 0
         BA1_SC6_SC6         126.073(19)        5 0 0 0     7 0 0-1
         BA1_SC6_SC6          53.927(19)        5 0 0 0     7 0 0 0
         BA1_SC6_SC6         124.857(10)        5 0 0 0   106 0 0-1
         BA1_SC6_SC6         124.857(10)        5 0 0 0   108 0-1-1
         BA1_SC6_O7          131.78(26)         5 0 0 0     2 1 0 0
         BA1_SC6_O7          125.12(32)         5 0 0 0    -8 1 0 1
         BA1_SC6_O8           58.08(28)         5 0 0 0     1 0 0 0
         BA1_SC6_O9           58.08(26)         5 0 0 0     4 0 0 0
         BA2_SC6_BA2         109.483(3)         1 0-1 0     2 1 0 0
         BA2_SC6_BA2          71.423(7)         1 0-1 0     6 1 0 0
         BA2_SC6_BA2         165.53(8)          1 0-1 0     7 0 1 0
         BA2_SC6_CU3          82.77(4)          1 0-1 0     1 0 0 0
         BA2_SC6_CU4          79.81(5)          1 0-1 0     2 1 0 0
         BA2_SC6_CU4          91.55(4)          1 0-1 0     6 1 0 0
         BA2_SC6_IN5         129.703(29)        1 0-1 0     2 0 0 0
         BA2_SC6_IN5          62.57(4)          1 0-1 0     4 0 0 0
         BA2_SC6_IN5          51.962(10)        1 0-1 0     7 0 0-1
         BA2_SC6_IN5         128.038(10)        1 0-1 0     7 0 0 0
         BA2_SC6_IN5         117.43(4)          1 0-1 0   106 0 0-1
         BA2_SC6_IN5          50.297(29)        1 0-1 0   108 0-1-1
         BA2_SC6_SC6         129.703(29)        1 0-1 0     2 0 0 0
         BA2_SC6_SC6          62.57(4)          1 0-1 0     4 0 0 0
         BA2_SC6_SC6          51.962(10)        1 0-1 0     7 0 0-1
         BA2_SC6_SC6         128.038(10)        1 0-1 0     7 0 0 0
         BA2_SC6_SC6         117.43(4)          1 0-1 0   106 0 0-1
         BA2_SC6_SC6          50.297(29)        1 0-1 0   108 0-1-1
         BA2_SC6_O7          110.48(27)         1 0-1 0     2 1 0 0
         BA2_SC6_O7           57.09(25)         1 0-1 0    -8 1 0 1
         BA2_SC6_O8          132.10(22)         1 0-1 0     1 0 0 0
         BA2_SC6_O9           59.62(30)         1 0-1 0     4 0 0 0
1Ba3Cu3Sc3InO12                                                     DISAGL   Version MS-DOS 2000-10-12T12:06:39  Page  35


            Angle             Degrees         atom 1 loc  atom 3 loc
         BA2_SC6_BA2         173.20(7)          2 1 0 0     6 1 0 0
         BA2_SC6_BA2          71.423(7)         2 1 0 0     7 0 1 0
         BA2_SC6_CU3          93.401(33)        2 1 0 0     1 0 0 0
         BA2_SC6_CU4          46.98(7)          2 1 0 0     2 1 0 0
         BA2_SC6_CU4         138.84(7)          2 1 0 0     6 1 0 0
         BA2_SC6_IN5          50.351(31)        2 1 0 0     2 0 0 0
         BA2_SC6_IN5         123.654(28)        2 1 0 0     4 0 0 0
         BA2_SC6_IN5          57.686(9)         2 1 0 0     7 0 0-1
         BA2_SC6_IN5         122.314(9)         2 1 0 0     7 0 0 0
         BA2_SC6_IN5          56.346(28)        2 1 0 0   106 0 0-1
         BA2_SC6_IN5         129.649(31)        2 1 0 0   108 0-1-1
         BA2_SC6_SC6          50.351(31)        2 1 0 0     2 0 0 0
         BA2_SC6_SC6         123.654(28)        2 1 0 0     4 0 0 0
         BA2_SC6_SC6          57.686(9)         2 1 0 0     7 0 0-1
         BA2_SC6_SC6         122.314(9)         2 1 0 0     7 0 0 0
         BA2_SC6_SC6          56.346(28)        2 1 0 0   106 0 0-1
         BA2_SC6_SC6         129.649(31)        2 1 0 0   108 0-1-1
         BA2_SC6_O7           57.88(34)         2 1 0 0     2 1 0 0
         BA2_SC6_O7          128.52(34)         2 1 0 0    -8 1 0 1
         BA2_SC6_O8           47.43(26)         2 1 0 0     1 0 0 0
         BA2_SC6_O9          126.8(4)           2 1 0 0     4 0 0 0
         BA2_SC6_BA2         109.483(3)         6 1 0 0     7 0 1 0
         BA2_SC6_CU3          93.401(33)        6 1 0 0     1 0 0 0
         BA2_SC6_CU4         138.84(7)          6 1 0 0     2 1 0 0
         BA2_SC6_CU4          46.98(7)          6 1 0 0     6 1 0 0
         BA2_SC6_IN5         123.654(28)        6 1 0 0     2 0 0 0
         BA2_SC6_IN5          50.351(31)        6 1 0 0     4 0 0 0
         BA2_SC6_IN5         122.314(9)         6 1 0 0     7 0 0-1
         BA2_SC6_IN5          57.686(9)         6 1 0 0     7 0 0 0
         BA2_SC6_IN5         129.649(31)        6 1 0 0   106 0 0-1
         BA2_SC6_IN5          56.346(28)        6 1 0 0   108 0-1-1
         BA2_SC6_SC6         123.654(28)        6 1 0 0     2 0 0 0
         BA2_SC6_SC6          50.351(31)        6 1 0 0     4 0 0 0
         BA2_SC6_SC6         122.314(9)         6 1 0 0     7 0 0-1
         BA2_SC6_SC6          57.686(9)         6 1 0 0     7 0 0 0
         BA2_SC6_SC6         129.649(31)        6 1 0 0   106 0 0-1
         BA2_SC6_SC6          56.346(28)        6 1 0 0   108 0-1-1
         BA2_SC6_O7          128.52(34)         6 1 0 0     2 1 0 0
         BA2_SC6_O7           57.88(34)         6 1 0 0    -8 1 0 1
         BA2_SC6_O8          126.79(29)         6 1 0 0     1 0 0 0
         BA2_SC6_O9           47.43(22)         6 1 0 0     4 0 0 0
         BA2_SC6_CU3          82.77(4)          7 0 1 0     1 0 0 0
         BA2_SC6_CU4          91.55(4)          7 0 1 0     2 1 0 0
         BA2_SC6_CU4          79.81(5)          7 0 1 0     6 1 0 0
         BA2_SC6_IN5          62.57(4)          7 0 1 0     2 0 0 0
         BA2_SC6_IN5         129.703(29)        7 0 1 0     4 0 0 0
         BA2_SC6_IN5         128.038(10)        7 0 1 0     7 0 0-1
         BA2_SC6_IN5          51.962(10)        7 0 1 0     7 0 0 0
         BA2_SC6_IN5          50.297(29)        7 0 1 0   106 0 0-1
         BA2_SC6_IN5         117.43(4)          7 0 1 0   108 0-1-1
         BA2_SC6_SC6          62.57(4)          7 0 1 0     2 0 0 0
         BA2_SC6_SC6         129.703(29)        7 0 1 0     4 0 0 0
         BA2_SC6_SC6         128.038(10)        7 0 1 0     7 0 0-1
         BA2_SC6_SC6          51.962(10)        7 0 1 0     7 0 0 0
         BA2_SC6_SC6          50.297(29)        7 0 1 0   106 0 0-1
         BA2_SC6_SC6         117.43(4)          7 0 1 0   108 0-1-1
1Ba3Cu3Sc3InO12                                                     DISAGL   Version MS-DOS 2000-10-12T12:06:39  Page  36


            Angle             Degrees         atom 1 loc  atom 3 loc
         BA2_SC6_O7           57.09(25)         7 0 1 0     2 1 0 0
         BA2_SC6_O7          110.48(27)         7 0 1 0    -8 1 0 1
         BA2_SC6_O8           59.62(27)         7 0 1 0     1 0 0 0
         BA2_SC6_O9          132.1(5)           7 0 1 0     4 0 0 0
         CU3_SC6_CU4          53.49(5)          1 0 0 0     2 1 0 0
         CU3_SC6_CU4          53.49(5)          1 0 0 0     6 1 0 0
         CU3_SC6_IN5         135.000(0)         1 0 0 0     2 0 0 0
         CU3_SC6_IN5         135.000(0)         1 0 0 0     4 0 0 0
         CU3_SC6_IN5          90.000(0)         1 0 0 0     7 0 0-1
         CU3_SC6_IN5          90.000(0)         1 0 0 0     7 0 0 0
         CU3_SC6_IN5          45.000(0)         1 0 0 0   106 0 0-1
         CU3_SC6_IN5          45.000(0)         1 0 0 0   108 0-1-1
         CU3_SC6_SC6         135.000(0)         1 0 0 0     2 0 0 0
         CU3_SC6_SC6         135.000(0)         1 0 0 0     4 0 0 0
         CU3_SC6_SC6          90.000(0)         1 0 0 0     7 0 0-1
         CU3_SC6_SC6          90.000(0)         1 0 0 0     7 0 0 0
         CU3_SC6_SC6          45.000(0)         1 0 0 0   106 0 0-1
         CU3_SC6_SC6          45.000(0)         1 0 0 0   108 0-1-1
         CU3_SC6_O7           39.82(34)         1 0 0 0     2 1 0 0
         CU3_SC6_O7           39.82(34)         1 0 0 0    -8 1 0 1
         CU3_SC6_O8          130.9(4)           1 0 0 0     1 0 0 0
         CU3_SC6_O9          130.9(10)          1 0 0 0     4 0 0 0
         CU4_SC6_CU4         106.97(11)         2 1 0 0     6 1 0 0
         CU4_SC6_IN5          97.33(6)          2 1 0 0     2 0 0 0
         CU4_SC6_IN5         135.548(18)        2 1 0 0     4 0 0 0
         CU4_SC6_IN5          46.482(22)        2 1 0 0     7 0 0-1
         CU4_SC6_IN5         133.518(22)        2 1 0 0     7 0 0 0
         CU4_SC6_IN5          44.452(18)        2 1 0 0   106 0 0-1
         CU4_SC6_IN5          82.67(6)          2 1 0 0   108 0-1-1
         CU4_SC6_SC6          97.33(6)          2 1 0 0     2 0 0 0
         CU4_SC6_SC6         135.548(18)        2 1 0 0     4 0 0 0
         CU4_SC6_SC6          46.482(22)        2 1 0 0     7 0 0-1
         CU4_SC6_SC6         133.518(22)        2 1 0 0     7 0 0 0
         CU4_SC6_SC6          44.452(18)        2 1 0 0   106 0 0-1
         CU4_SC6_SC6          82.67(6)          2 1 0 0   108 0-1-1
         CU4_SC6_O7           39.31(24)         2 1 0 0     2 1 0 0
         CU4_SC6_O7           81.93(35)         2 1 0 0    -8 1 0 1
         CU4_SC6_O8           94.34(28)         2 1 0 0     1 0 0 0
         CU4_SC6_O9          134.6(8)           2 1 0 0     4 0 0 0
         CU4_SC6_IN5         135.548(18)        6 1 0 0     2 0 0 0
         CU4_SC6_IN5          97.33(6)          6 1 0 0     4 0 0 0
         CU4_SC6_IN5         133.518(22)        6 1 0 0     7 0 0-1
         CU4_SC6_IN5          46.482(22)        6 1 0 0     7 0 0 0
         CU4_SC6_IN5          82.67(6)          6 1 0 0   106 0 0-1
         CU4_SC6_IN5          44.452(18)        6 1 0 0   108 0-1-1
         CU4_SC6_SC6         135.548(18)        6 1 0 0     2 0 0 0
         CU4_SC6_SC6          97.33(6)          6 1 0 0     4 0 0 0
         CU4_SC6_SC6         133.518(22)        6 1 0 0     7 0 0-1
         CU4_SC6_SC6          46.482(22)        6 1 0 0     7 0 0 0
         CU4_SC6_SC6          82.67(6)          6 1 0 0   106 0 0-1
         CU4_SC6_SC6          44.452(18)        6 1 0 0   108 0-1-1
         CU4_SC6_O7           81.93(35)         6 1 0 0     2 1 0 0
         CU4_SC6_O7           39.31(24)         6 1 0 0    -8 1 0 1
         CU4_SC6_O8          134.65(10)         6 1 0 0     1 0 0 0
         CU4_SC6_O9           94.3(5)           6 1 0 0     4 0 0 0
         IN5_SC6_IN5          90.000(0)         2 0 0 0     4 0 0 0
1Ba3Cu3Sc3InO12                                                     DISAGL   Version MS-DOS 2000-10-12T12:06:39  Page  37


            Angle             Degrees         atom 1 loc  atom 3 loc
         IN5_SC6_IN5          90.000(0)         2 0 0 0     7 0 0-1
         IN5_SC6_IN5          90.000(0)         2 0 0 0     7 0 0 0
         IN5_SC6_IN5          90.000(0)         2 0 0 0   106 0 0-1
         IN5_SC6_IN5         179.972(0)         2 0 0 0   108 0-1-1
         IN5_SC6_SC6            .000(0)         2 0 0 0     2 0 0 0
         IN5_SC6_SC6          90.000(0)         2 0 0 0     4 0 0 0
         IN5_SC6_SC6          90.000(0)         2 0 0 0     7 0 0-1
         IN5_SC6_SC6          90.000(0)         2 0 0 0     7 0 0 0
         IN5_SC6_SC6          90.000(0)         2 0 0 0   106 0 0-1
         IN5_SC6_SC6         179.972(0)         2 0 0 0   108 0-1-1
         IN5_SC6_O7           95.37(34)         2 0 0 0     2 1 0 0
         IN5_SC6_O7          173.03(27)         2 0 0 0    -8 1 0 1
         IN5_SC6_O8            4.1(4)           2 0 0 0     1 0 0 0
         IN5_SC6_O9           94.15(27)         2 0 0 0     4 0 0 0
         IN5_SC6_IN5          90.000(0)         4 0 0 0     7 0 0-1
         IN5_SC6_IN5          90.000(0)         4 0 0 0     7 0 0 0
         IN5_SC6_IN5         179.972(0)         4 0 0 0   106 0 0-1
         IN5_SC6_IN5          90.000(0)         4 0 0 0   108 0-1-1
         IN5_SC6_SC6          90.000(0)         4 0 0 0     2 0 0 0
         IN5_SC6_SC6            .000(0)         4 0 0 0     4 0 0 0
         IN5_SC6_SC6          90.000(0)         4 0 0 0     7 0 0-1
         IN5_SC6_SC6          90.000(0)         4 0 0 0     7 0 0 0
         IN5_SC6_SC6         179.972(0)         4 0 0 0   106 0 0-1
         IN5_SC6_SC6          90.000(0)         4 0 0 0   108 0-1-1
         IN5_SC6_O7          173.03(27)         4 0 0 0     2 1 0 0
         IN5_SC6_O7           95.37(34)         4 0 0 0    -8 1 0 1
         IN5_SC6_O8           94.1(4)           4 0 0 0     1 0 0 0
         IN5_SC6_O9            4.1(30)          4 0 0 0     4 0 0 0
         IN5_SC6_IN5         180.000(0)         7 0 0-1     7 0 0 0
         IN5_SC6_IN5          90.000(0)         7 0 0-1   106 0 0-1
         IN5_SC6_IN5          90.000(0)         7 0 0-1   108 0-1-1
         IN5_SC6_SC6          90.000(0)         7 0 0-1     2 0 0 0
         IN5_SC6_SC6          90.000(0)         7 0 0-1     4 0 0 0
         IN5_SC6_SC6            .000(0)         7 0 0-1     7 0 0-1
         IN5_SC6_SC6         180.000(0)         7 0 0-1     7 0 0 0
         IN5_SC6_SC6          90.000(0)         7 0 0-1   106 0 0-1
         IN5_SC6_SC6          90.000(0)         7 0 0-1   108 0-1-1
         IN5_SC6_O7           85.57(25)         7 0 0-1     2 1 0 0
         IN5_SC6_O7           94.43(25)         7 0 0-1    -8 1 0 1
         IN5_SC6_O8           90.000(0)         7 0 0-1     1 0 0 0
         IN5_SC6_O9           90.00(19)         7 0 0-1     4 0 0 0
         IN5_SC6_IN5          90.000(0)         7 0 0 0   106 0 0-1
         IN5_SC6_IN5          90.000(0)         7 0 0 0   108 0-1-1
         IN5_SC6_SC6          90.000(0)         7 0 0 0     2 0 0 0
         IN5_SC6_SC6          90.000(0)         7 0 0 0     4 0 0 0
         IN5_SC6_SC6         180.000(0)         7 0 0 0     7 0 0-1
         IN5_SC6_SC6            .000(0)         7 0 0 0     7 0 0 0
         IN5_SC6_SC6          90.000(0)         7 0 0 0   106 0 0-1
         IN5_SC6_SC6          90.000(0)         7 0 0 0   108 0-1-1
         IN5_SC6_O7           94.43(25)         7 0 0 0     2 1 0 0
         IN5_SC6_O7           85.57(25)         7 0 0 0    -8 1 0 1
         IN5_SC6_O8           90.000(0)         7 0 0 0     1 0 0 0
         IN5_SC6_O9           90.00(19)         7 0 0 0     4 0 0 0
         IN5_SC6_IN5          90.000(0)       106 0 0-1   108 0-1-1
         IN5_SC6_SC6          90.000(0)       106 0 0-1     2 0 0 0
         IN5_SC6_SC6         179.972(0)       106 0 0-1     4 0 0 0
1Ba3Cu3Sc3InO12                                                     DISAGL   Version MS-DOS 2000-10-12T12:06:39  Page  38


            Angle             Degrees         atom 1 loc  atom 3 loc
         IN5_SC6_SC6          90.000(0)       106 0 0-1     7 0 0-1
         IN5_SC6_SC6          90.000(0)       106 0 0-1     7 0 0 0
         IN5_SC6_SC6            .000(0)       106 0 0-1   106 0 0-1
         IN5_SC6_SC6          90.000(0)       106 0 0-1   108 0-1-1
         IN5_SC6_O7            6.97(27)       106 0 0-1     2 1 0 0
         IN5_SC6_O7           84.63(34)       106 0 0-1    -8 1 0 1
         IN5_SC6_O8           85.9(4)         106 0 0-1     1 0 0 0
         IN5_SC6_O9          176.(8)          106 0 0-1     4 0 0 0
         IN5_SC6_SC6         179.972(0)       108 0-1-1     2 0 0 0
         IN5_SC6_SC6          90.000(0)       108 0-1-1     4 0 0 0
         IN5_SC6_SC6          90.000(0)       108 0-1-1     7 0 0-1
         IN5_SC6_SC6          90.000(0)       108 0-1-1     7 0 0 0
         IN5_SC6_SC6          90.000(0)       108 0-1-1   106 0 0-1
         IN5_SC6_SC6            .000(0)       108 0-1-1   108 0-1-1
         IN5_SC6_O7           84.63(34)       108 0-1-1     2 1 0 0
         IN5_SC6_O7            6.97(27)       108 0-1-1    -8 1 0 1
         IN5_SC6_O8          175.9(4)         108 0-1-1     1 0 0 0
         IN5_SC6_O9           85.9(5)         108 0-1-1     4 0 0 0
         SC6_SC6_SC6          90.000(0)         2 0 0 0     4 0 0 0
         SC6_SC6_SC6          90.000(0)         2 0 0 0     7 0 0-1
         SC6_SC6_SC6          90.000(0)         2 0 0 0     7 0 0 0
         SC6_SC6_SC6          90.000(0)         2 0 0 0   106 0 0-1
         SC6_SC6_SC6         179.972(0)         2 0 0 0   108 0-1-1
         SC6_SC6_O7           95.37(34)         2 0 0 0     2 1 0 0
         SC6_SC6_O7          173.03(27)         2 0 0 0    -8 1 0 1
         SC6_SC6_O8            4.1(4)           2 0 0 0     1 0 0 0
         SC6_SC6_O9           94.15(27)         2 0 0 0     4 0 0 0
         SC6_SC6_SC6          90.000(0)         4 0 0 0     7 0 0-1
         SC6_SC6_SC6          90.000(0)         4 0 0 0     7 0 0 0
         SC6_SC6_SC6         179.972(0)         4 0 0 0   106 0 0-1
         SC6_SC6_SC6          90.000(0)         4 0 0 0   108 0-1-1
         SC6_SC6_O7          173.03(27)         4 0 0 0     2 1 0 0
         SC6_SC6_O7           95.37(34)         4 0 0 0    -8 1 0 1
         SC6_SC6_O8           94.1(4)           4 0 0 0     1 0 0 0
         SC6_SC6_O9            4.1(30)          4 0 0 0     4 0 0 0
         SC6_SC6_SC6         180.000(0)         7 0 0-1     7 0 0 0
         SC6_SC6_SC6          90.000(0)         7 0 0-1   106 0 0-1
         SC6_SC6_SC6          90.000(0)         7 0 0-1   108 0-1-1
         SC6_SC6_O7           85.57(25)         7 0 0-1     2 1 0 0
         SC6_SC6_O7           94.43(25)         7 0 0-1    -8 1 0 1
         SC6_SC6_O8           90.000(0)         7 0 0-1     1 0 0 0
         SC6_SC6_O9           90.00(19)         7 0 0-1     4 0 0 0
         SC6_SC6_SC6          90.000(0)         7 0 0 0   106 0 0-1
         SC6_SC6_SC6          90.000(0)         7 0 0 0   108 0-1-1
         SC6_SC6_O7           94.43(25)         7 0 0 0     2 1 0 0
         SC6_SC6_O7           85.57(25)         7 0 0 0    -8 1 0 1
         SC6_SC6_O8           90.000(0)         7 0 0 0     1 0 0 0
         SC6_SC6_O9           90.00(19)         7 0 0 0     4 0 0 0
         SC6_SC6_SC6          90.000(0)       106 0 0-1   108 0-1-1
         SC6_SC6_O7            6.97(27)       106 0 0-1     2 1 0 0
         SC6_SC6_O7           84.63(34)       106 0 0-1    -8 1 0 1
         SC6_SC6_O8           85.9(4)         106 0 0-1     1 0 0 0
         SC6_SC6_O9          176.(8)          106 0 0-1     4 0 0 0
         SC6_SC6_O7           84.63(34)       108 0-1-1     2 1 0 0
         SC6_SC6_O7            6.97(27)       108 0-1-1    -8 1 0 1
         SC6_SC6_O8          175.9(4)         108 0-1-1     1 0 0 0
1Ba3Cu3Sc3InO12                                                     DISAGL   Version MS-DOS 2000-10-12T12:06:39  Page  39


            Angle             Degrees         atom 1 loc  atom 3 loc
         SC6_SC6_O9           85.9(5)         108 0-1-1     4 0 0 0
          O7_SC6_O7           79.6(7)           2 1 0 0    -8 1 0 1
          O7_SC6_O8           91.23(34)         2 1 0 0     1 0 0 0
          O7_SC6_O9          169.(4)            2 1 0 0     4 0 0 0
          O7_SC6_O8          169.5(6)          -8 1 0 1     1 0 0 0
          O7_SC6_O9           91.2(9)          -8 1 0 1     4 0 0 0
          O8_SC6_O9           98.3(5)           1 0 0 0     4 0 0 0

       Vector         Length           Optr Cell        Neighbor atom coordinates
       O7_BA2         3.337(13)          1 0 0 0      .27777    .77777    .00000
       O7_BA2         2.889(10)          6 1 1 0      .22223    .72223    .50000
       O7_CU3         1.984(13)          2 0 0 0      .00000    .50000    .25000
       O7_CU3         4.498(9)           6 0 1-1      .00000    .50000   -.25000
       O7_CU4         1.944(9)           1 0 0 0      .10603    .60603    .00000
       O7_CU4         4.237(12)          3 0 1 0     -.10603    .39397    .00000
       O7_CU4         3.507(11)          5 0 0 0     -.10603    .60603    .50000
       O7_CU4         3.507(11)          7 0 1 0      .10603    .39397    .50000
       O7_IN5         2.1988(20)         4 0 1 0      .00000    .75822    .25000
       O7_IN5         2.1988(20)       105 0 0-1      .25822    .50000    .25000
       O7_SC6         2.1988(20)         4 0 1 0      .00000    .75822    .25000
       O7_SC6         2.1988(20)       105 0 0-1      .25822    .50000    .25000
       O7_O7          3.953(26)          3 0 1 0     -.11694    .38306    .22983
       O7_O7          3.871(19)         -3 0 0 0      .11694    .61694   -.22983
       O7_O7          2.816(19)         -5 0 1 1      .11694    .38306    .27017
       O7_O7          2.816(19)         -7 0 0 1     -.11694    .61694    .27017
       O7_O8          4.2298(4)          3 0 1 0     -.12966    .87034    .25000
       O7_O8          3.037(9)           4 0 1 0      .12966    .87034    .25000
       O7_O8          3.037(9)         105 0 0-1      .37034    .62966    .25000
       O7_O8          4.2298(4)        106 0 0-1      .37034    .37034    .25000
       O7_O9          2.815(13)          1 0 0 0      .24220    .50049    .00000
       O7_O9          3.064(12)          7 0 1 0      .24220    .49951    .50000
       O7_O9          3.064(12)        102 0 0 0     -.00049    .74220    .50000
       O7_O9          2.815(13)        108-1 0-1      .00049    .74220    .00000

            Angle             Degrees         atom 1 loc  atom 3 loc
         BA2_O7_BA2           87.41(33)         1 0 0 0     6 1 1 0
         BA2_O7_CU3          149.5(4)           1 0 0 0     2 0 0 0
         BA2_O7_CU3           80.62(19)         1 0 0 0     6 0 1-1
         BA2_O7_CU4           60.00(32)         1 0 0 0     1 0 0 0
         BA2_O7_CU4          117.37(24)         1 0 0 0     3 0 1 0
         BA2_O7_CU4          146.67(17)         1 0 0 0     5 0 0 0
         BA2_O7_CU4          146.67(17)         1 0 0 0     7 0 1 0
         BA2_O7_IN5           88.20(34)         1 0 0 0     4 0 1 0
         BA2_O7_IN5           88.20(34)         1 0 0 0   105 0 0-1
         BA2_O7_SC6           88.20(34)         1 0 0 0     4 0 1 0
         BA2_O7_SC6           88.20(34)         1 0 0 0   105 0 0-1
         BA2_O7_O7           144.55(16)         1 0 0 0     3 0 1 0
         BA2_O7_O7            54.55(16)         1 0 0 0    -3 0 0 0
         BA2_O7_O7           129.93(30)         1 0 0 0    -5 0 1 1
         BA2_O7_O7           129.93(30)         1 0 0 0    -7 0 0 1
         BA2_O7_O8            90.70(17)         1 0 0 0     3 0 1 0
         BA2_O7_O8            55.19(29)         1 0 0 0     4 0 1 0
         BA2_O7_O8            55.19(29)         1 0 0 0   105 0 0-1
         BA2_O7_O8            90.70(17)         1 0 0 0   106 0 0-1
         BA2_O7_O9            65.15(33)         1 0 0 0     1 0 0 0
         BA2_O7_O9           114.4(5)           1 0 0 0     7 0 1 0
1Ba3Cu3Sc3InO12                                                     DISAGL   Version MS-DOS 2000-10-12T12:06:39  Page  40


            Angle             Degrees         atom 1 loc  atom 3 loc
         BA2_O7_O9           114.4(5)           1 0 0 0   102 0 0 0
         BA2_O7_O9            65.15(33)         1 0 0 0   108-1 0-1
         BA2_O7_CU3          123.1(5)           6 1 1 0     2 0 0 0
         BA2_O7_CU3          168.0(4)           6 1 1 0     6 0 1-1
         BA2_O7_CU4          147.4(6)           6 1 1 0     1 0 0 0
         BA2_O7_CU4          155.2(4)           6 1 1 0     3 0 1 0
         BA2_O7_CU4           80.58(21)         6 1 1 0     5 0 0 0
         BA2_O7_CU4           80.58(21)         6 1 1 0     7 0 1 0
         BA2_O7_IN5           83.19(25)         6 1 1 0     4 0 1 0
         BA2_O7_IN5           83.19(25)         6 1 1 0   105 0 0-1
         BA2_O7_SC6           83.19(25)         6 1 1 0     4 0 1 0
         BA2_O7_SC6           83.19(25)         6 1 1 0   105 0 0-1
         BA2_O7_O7           128.04(26)         6 1 1 0     3 0 1 0
         BA2_O7_O7           141.96(26)         6 1 1 0    -3 0 0 0
         BA2_O7_O7           109.7(4)           6 1 1 0    -5 0 1 1
         BA2_O7_O7           109.7(4)           6 1 1 0    -7 0 0 1
         BA2_O7_O8            87.71(13)         6 1 1 0     3 0 1 0
         BA2_O7_O8            59.98(27)         6 1 1 0     4 0 1 0
         BA2_O7_O8            59.98(27)         6 1 1 0   105 0 0-1
         BA2_O7_O8            87.71(13)         6 1 1 0   106 0 0-1
         BA2_O7_O9           121.7(5)           6 1 1 0     1 0 0 0
         BA2_O7_O9            53.26(20)         6 1 1 0     7 0 1 0
         BA2_O7_O9            53.26(20)         6 1 1 0   102 0 0 0
         BA2_O7_O9           121.7(5)           6 1 1 0   108-1 0-1
         CU3_O7_CU3           68.84(25)         2 0 0 0     6 0 1-1
         CU3_O7_CU4           89.5(4)           2 0 0 0     1 0 0 0
         CU3_O7_CU4           32.09(17)         2 0 0 0     3 0 1 0
         CU3_O7_CU4           51.89(23)         2 0 0 0     5 0 0 0
         CU3_O7_CU4           51.89(23)         2 0 0 0     7 0 1 0
         CU3_O7_IN5           94.97(35)         2 0 0 0     4 0 1 0
         CU3_O7_IN5           94.97(35)         2 0 0 0   105 0 0-1
         CU3_O7_SC6           94.97(35)         2 0 0 0     4 0 1 0
         CU3_O7_SC6           94.97(35)         2 0 0 0   105 0 0-1
         CU3_O7_O7             4.91(27)         2 0 0 0     3 0 1 0
         CU3_O7_O7            94.91(27)         2 0 0 0    -3 0 0 0
         CU3_O7_O7            44.790(23)        2 0 0 0    -5 0 1 1
         CU3_O7_O7            44.791(23)        2 0 0 0    -7 0 0 1
         CU3_O7_O8            90.58(17)         2 0 0 0     3 0 1 0
         CU3_O7_O8           137.14(33)         2 0 0 0     4 0 1 0
         CU3_O7_O8           137.14(33)         2 0 0 0   105 0 0-1
         CU3_O7_O8            90.58(17)         2 0 0 0   106 0 0-1
         CU3_O7_O9            94.9(5)           2 0 0 0     1 0 0 0
         CU3_O7_O9            87.6(5)           2 0 0 0     7 0 1 0
         CU3_O7_O9            87.6(5)           2 0 0 0   102 0 0 0
         CU3_O7_O9            94.9(5)           2 0 0 0   108-1 0-1
         CU3_O7_CU4           20.62(23)         6 0 1-1     1 0 0 0
         CU3_O7_CU4           36.75(8)          6 0 1-1     3 0 1 0
         CU3_O7_CU4          109.58(26)         6 0 1-1     5 0 0 0
         CU3_O7_CU4          109.58(26)         6 0 1-1     7 0 1 0
         CU3_O7_IN5           96.35(24)         6 0 1-1     4 0 1 0
         CU3_O7_IN5           96.34(24)         6 0 1-1   105 0 0-1
         CU3_O7_SC6           96.35(24)         6 0 1-1     4 0 1 0
         CU3_O7_SC6           96.34(24)         6 0 1-1   105 0 0-1
         CU3_O7_O7            63.93(17)         6 0 1-1     3 0 1 0
         CU3_O7_O7            26.07(17)         6 0 1-1    -3 0 0 0
         CU3_O7_O7            78.46(33)         6 0 1-1    -5 0 1 1
1Ba3Cu3Sc3InO12                                                     DISAGL   Version MS-DOS 2000-10-12T12:06:39  Page  41


            Angle             Degrees         atom 1 loc  atom 3 loc
         CU3_O7_O7            78.46(33)         6 0 1-1    -7 0 0 1
         CU3_O7_O8            92.41(13)         6 0 1-1     3 0 1 0
         CU3_O7_O8           112.06(22)         6 0 1-1     4 0 1 0
         CU3_O7_O8           112.06(22)         6 0 1-1   105 0 0-1
         CU3_O7_O8            92.41(13)         6 0 1-1   106 0 0-1
         CU3_O7_O9            52.7(4)           6 0 1-1     1 0 0 0
         CU3_O7_O9           132.57(22)         6 0 1-1     7 0 1 0
         CU3_O7_O9           132.57(22)         6 0 1-1   102 0 0 0
         CU3_O7_O9            52.7(4)           6 0 1-1   108-1 0-1
         CU4_O7_CU4           57.38(30)         1 0 0 0     3 0 1 0
         CU4_O7_CU4          126.3(4)           1 0 0 0     5 0 0 0
         CU4_O7_CU4          126.3(4)           1 0 0 0     7 0 1 0
         CU4_O7_IN5           94.92(25)         1 0 0 0     4 0 1 0
         CU4_O7_IN5           94.92(25)         1 0 0 0   105 0 0-1
         CU4_O7_SC6           94.92(25)         1 0 0 0     4 0 1 0
         CU4_O7_SC6           94.92(25)         1 0 0 0   105 0 0-1
         CU4_O7_O7            84.6(4)           1 0 0 0     3 0 1 0
         CU4_O7_O7             5.4(4)           1 0 0 0    -3 0 0 0
         CU4_O7_O7            93.1(4)           1 0 0 0    -5 0 1 1
         CU4_O7_O7            93.1(4)           1 0 0 0    -7 0 0 1
         CU4_O7_O8            92.36(13)         1 0 0 0     3 0 1 0
         CU4_O7_O8            97.2(4)           1 0 0 0     4 0 1 0
         CU4_O7_O8            97.2(4)           1 0 0 0   105 0 0-1
         CU4_O7_O8            92.37(13)         1 0 0 0   106 0 0-1
         CU4_O7_O9            47.01(25)         1 0 0 0     1 0 0 0
         CU4_O7_O9           137.84(17)         1 0 0 0     7 0 1 0
         CU4_O7_O9           137.84(17)         1 0 0 0   102 0 0 0
         CU4_O7_O9            47.01(25)         1 0 0 0   108-1 0-1
         CU4_O7_CU4           78.17(24)         3 0 1 0     5 0 0 0
         CU4_O7_CU4           78.16(24)         3 0 1 0     7 0 1 0
         CU4_O7_IN5           96.81(30)         3 0 1 0     4 0 1 0
         CU4_O7_IN5           96.81(30)         3 0 1 0   105 0 0-1
         CU4_O7_SC6           96.81(30)         3 0 1 0     4 0 1 0
         CU4_O7_SC6           96.81(30)         3 0 1 0   105 0 0-1
         CU4_O7_O7            27.18(16)         3 0 1 0     3 0 1 0
         CU4_O7_O7            62.82(16)         3 0 1 0    -3 0 0 0
         CU4_O7_O7            55.30(18)         3 0 1 0    -5 0 1 1
         CU4_O7_O7            55.30(18)         3 0 1 0    -7 0 0 1
         CU4_O7_O8            91.75(15)         3 0 1 0     3 0 1 0
         CU4_O7_O8           133.18(26)         3 0 1 0     4 0 1 0
         CU4_O7_O8           133.18(26)         3 0 1 0   105 0 0-1
         CU4_O7_O8            91.74(15)         3 0 1 0   106 0 0-1
         CU4_O7_O9            73.1(4)           3 0 1 0     1 0 0 0
         CU4_O7_O9           111.0(4)           3 0 1 0     7 0 1 0
         CU4_O7_O9           111.0(4)           3 0 1 0   102 0 0 0
         CU4_O7_O9            73.1(4)           3 0 1 0   108-1 0-1
         CU4_O7_CU4           61.48(20)         5 0 0 0     7 0 1 0
         CU4_O7_IN5           59.69(23)         5 0 0 0     4 0 1 0
         CU4_O7_IN5          120.7(4)           5 0 0 0   105 0 0-1
         CU4_O7_SC6           59.69(23)         5 0 0 0     4 0 1 0
         CU4_O7_SC6          120.7(4)           5 0 0 0   105 0 0-1
         CU4_O7_O7            55.69(17)         5 0 0 0     3 0 1 0
         CU4_O7_O7           130.45(14)         5 0 0 0    -3 0 0 0
         CU4_O7_O7            83.39(29)         5 0 0 0    -5 0 1 1
         CU4_O7_O7            33.62(29)         5 0 0 0    -7 0 0 1
         CU4_O7_O8            58.06(13)         5 0 0 0     3 0 1 0
1Ba3Cu3Sc3InO12                                                     DISAGL   Version MS-DOS 2000-10-12T12:06:39  Page  42


            Angle             Degrees         atom 1 loc  atom 3 loc
         CU4_O7_O8            92.23(19)         5 0 0 0     4 0 1 0
         CU4_O7_O8           136.34(29)         5 0 0 0   105 0 0-1
         CU4_O7_O8           119.49(23)         5 0 0 0   106 0 0-1
         CU4_O7_O9           146.3(6)           5 0 0 0     1 0 0 0
         CU4_O7_O9            82.7(4)           5 0 0 0     7 0 1 0
         CU4_O7_O9            35.73(33)         5 0 0 0   102 0 0 0
         CU4_O7_O9            95.17(20)         5 0 0 0   108-1 0-1
         CU4_O7_IN5          120.7(4)           7 0 1 0     4 0 1 0
         CU4_O7_IN5           59.69(23)         7 0 1 0   105 0 0-1
         CU4_O7_SC6          120.7(4)           7 0 1 0     4 0 1 0
         CU4_O7_SC6           59.69(23)         7 0 1 0   105 0 0-1
         CU4_O7_O7            55.69(17)         7 0 1 0     3 0 1 0
         CU4_O7_O7           130.45(14)         7 0 1 0    -3 0 0 0
         CU4_O7_O7            33.62(29)         7 0 1 0    -5 0 1 1
         CU4_O7_O7            83.39(29)         7 0 1 0    -7 0 0 1
         CU4_O7_O8           119.49(23)         7 0 1 0     3 0 1 0
         CU4_O7_O8           136.34(29)         7 0 1 0     4 0 1 0
         CU4_O7_O8            92.23(19)         7 0 1 0   105 0 0-1
         CU4_O7_O8            58.06(13)         7 0 1 0   106 0 0-1
         CU4_O7_O9            95.17(20)         7 0 1 0     1 0 0 0
         CU4_O7_O9            35.73(33)         7 0 1 0     7 0 1 0
         CU4_O7_O9            82.7(4)           7 0 1 0   102 0 0 0
         CU4_O7_O9           146.3(6)           7 0 1 0   108-1 0-1
         IN5_O7_IN5          166.1(5)           4 0 1 0   105 0 0-1
         IN5_O7_SC6             .000(0)         4 0 1 0     4 0 1 0
         IN5_O7_SC6          166.1(5)           4 0 1 0   105 0 0-1
         IN5_O7_O7            95.37(34)         4 0 1 0     3 0 1 0
         IN5_O7_O7            94.43(25)         4 0 1 0    -3 0 0 0
         IN5_O7_O7           138.9(4)           4 0 1 0    -5 0 1 1
         IN5_O7_O7            50.18(34)         4 0 1 0    -7 0 0 1
         IN5_O7_O8             5.07(28)         4 0 1 0     3 0 1 0
         IN5_O7_O8            42.41(17)         4 0 1 0     4 0 1 0
         IN5_O7_O8           126.2(6)           4 0 1 0   105 0 0-1
         IN5_O7_O8           170.9(4)           4 0 1 0   106 0 0-1
         IN5_O7_O9           140.4(4)           4 0 1 0     1 0 0 0
         IN5_O7_O9           127.2(4)           4 0 1 0     7 0 1 0
         IN5_O7_O9            43.62(24)         4 0 1 0   102 0 0 0
         IN5_O7_O9            47.96(25)         4 0 1 0   108-1 0-1
         IN5_O7_SC6          166.1(5)         105 0 0-1     4 0 1 0
         IN5_O7_SC6             .000(0)       105 0 0-1   105 0 0-1
         IN5_O7_O7            95.37(34)       105 0 0-1     3 0 1 0
         IN5_O7_O7            94.43(25)       105 0 0-1    -3 0 0 0
         IN5_O7_O7            50.18(34)       105 0 0-1    -5 0 1 1
         IN5_O7_O7           138.9(4)         105 0 0-1    -7 0 0 1
         IN5_O7_O8           170.9(4)         105 0 0-1     3 0 1 0
         IN5_O7_O8           126.2(6)         105 0 0-1     4 0 1 0
         IN5_O7_O8            42.41(17)       105 0 0-1   105 0 0-1
         IN5_O7_O8             5.07(28)       105 0 0-1   106 0 0-1
         IN5_O7_O9            47.96(25)       105 0 0-1     1 0 0 0
         IN5_O7_O9            43.62(24)       105 0 0-1     7 0 1 0
         IN5_O7_O9           127.2(4)         105 0 0-1   102 0 0 0
         IN5_O7_O9           140.4(4)         105 0 0-1   108-1 0-1
         SC6_O7_SC6          166.1(5)           4 0 1 0   105 0 0-1
         SC6_O7_O7            95.37(34)         4 0 1 0     3 0 1 0
         SC6_O7_O7            94.43(25)         4 0 1 0    -3 0 0 0
         SC6_O7_O7           138.9(4)           4 0 1 0    -5 0 1 1
1Ba3Cu3Sc3InO12                                                     DISAGL   Version MS-DOS 2000-10-12T12:06:39  Page  43


            Angle             Degrees         atom 1 loc  atom 3 loc
         SC6_O7_O7            50.18(34)         4 0 1 0    -7 0 0 1
         SC6_O7_O8             5.07(28)         4 0 1 0     3 0 1 0
         SC6_O7_O8            42.41(17)         4 0 1 0     4 0 1 0
         SC6_O7_O8           126.2(6)           4 0 1 0   105 0 0-1
         SC6_O7_O8           170.9(4)           4 0 1 0   106 0 0-1
         SC6_O7_O9           140.4(4)           4 0 1 0     1 0 0 0
         SC6_O7_O9           127.2(4)           4 0 1 0     7 0 1 0
         SC6_O7_O9            43.62(24)         4 0 1 0   102 0 0 0
         SC6_O7_O9            47.96(25)         4 0 1 0   108-1 0-1
         SC6_O7_O7            95.37(34)       105 0 0-1     3 0 1 0
         SC6_O7_O7            94.43(25)       105 0 0-1    -3 0 0 0
         SC6_O7_O7            50.18(34)       105 0 0-1    -5 0 1 1
         SC6_O7_O7           138.9(4)         105 0 0-1    -7 0 0 1
         SC6_O7_O8           170.9(4)         105 0 0-1     3 0 1 0
         SC6_O7_O8           126.2(6)         105 0 0-1     4 0 1 0
         SC6_O7_O8            42.41(17)       105 0 0-1   105 0 0-1
         SC6_O7_O8             5.07(28)       105 0 0-1   106 0 0-1
         SC6_O7_O9            47.96(25)       105 0 0-1     1 0 0 0
         SC6_O7_O9            43.62(24)       105 0 0-1     7 0 1 0
         SC6_O7_O9           127.2(4)         105 0 0-1   102 0 0 0
         SC6_O7_O9           140.4(4)         105 0 0-1   108-1 0-1
          O7_O7_O7            90.000(0)         3 0 1 0    -3 0 0 0
          O7_O7_O7            45.42(4)          3 0 1 0    -5 0 1 1
          O7_O7_O7            45.42(4)          3 0 1 0    -7 0 0 1
          O7_O7_O8            90.78(17)         3 0 1 0     3 0 1 0
          O7_O7_O8           137.78(32)         3 0 1 0     4 0 1 0
          O7_O7_O8           137.77(32)         3 0 1 0   105 0 0-1
          O7_O7_O8            90.78(17)         3 0 1 0   106 0 0-1
          O7_O7_O9            91.5(5)           3 0 1 0     1 0 0 0
          O7_O7_O9            91.2(4)           3 0 1 0     7 0 1 0
          O7_O7_O9            91.2(4)           3 0 1 0   102 0 0 0
          O7_O7_O9            91.5(5)           3 0 1 0   108-1 0-1
          O7_O7_O7            96.9(4)          -3 0 0 0    -5 0 1 1
          O7_O7_O7            96.9(4)          -3 0 0 0    -7 0 0 1
          O7_O7_O8            92.30(13)        -3 0 0 0     3 0 1 0
          O7_O7_O8            93.21(18)        -3 0 0 0     4 0 1 0
          O7_O7_O8            93.21(18)        -3 0 0 0   105 0 0-1
          O7_O7_O8            92.30(13)        -3 0 0 0   106 0 0-1
          O7_O7_O9            46.57(23)        -3 0 0 0     1 0 0 0
          O7_O7_O9           137.95(22)        -3 0 0 0     7 0 1 0
          O7_O7_O9           137.95(22)        -3 0 0 0   102 0 0 0
          O7_O7_O9            46.57(23)        -3 0 0 0   108-1 0-1
          O7_O7_O7            89.17(9)         -5 0 1 1    -7 0 0 1
          O7_O7_O8           134.91(20)        -5 0 1 1     3 0 1 0
          O7_O7_O8           169.5(5)          -5 0 1 1     4 0 1 0
          O7_O7_O8            92.46(32)        -5 0 1 1   105 0 0-1
          O7_O7_O8            45.84(17)        -5 0 1 1   106 0 0-1
          O7_O7_O9            65.9(4)          -5 0 1 1     1 0 0 0
          O7_O7_O9            57.0(4)          -5 0 1 1     7 0 1 0
          O7_O7_O9           113.3(6)          -5 0 1 1   102 0 0 0
          O7_O7_O9           127.7(6)          -5 0 1 1   108-1 0-1
          O7_O7_O8            45.84(17)        -7 0 0 1     3 0 1 0
          O7_O7_O8            92.46(32)        -7 0 0 1     4 0 1 0
          O7_O7_O8           169.5(5)          -7 0 0 1   105 0 0-1
          O7_O7_O8           134.91(20)        -7 0 0 1   106 0 0-1
          O7_O7_O9           127.7(6)          -7 0 0 1     1 0 0 0
1Ba3Cu3Sc3InO12                                                     DISAGL   Version MS-DOS 2000-10-12T12:06:39  Page  44


            Angle             Degrees         atom 1 loc  atom 3 loc
          O7_O7_O9           113.3(6)          -7 0 0 1     7 0 1 0
          O7_O7_O9            57.0(4)          -7 0 0 1   102 0 0 0
          O7_O7_O9            65.9(4)          -7 0 0 1   108-1 0-1
          O8_O7_O8            47.0(4)           3 0 1 0     4 0 1 0
          O8_O7_O8           131.06(34)         3 0 1 0   105 0 0-1
          O8_O7_O8           175.14(25)         3 0 1 0   106 0 0-1
          O8_O7_O9           138.79(30)         3 0 1 0     1 0 0 0
          O8_O7_O9           129.70(29)         3 0 1 0     7 0 1 0
          O8_O7_O9            45.66(18)         3 0 1 0   102 0 0 0
          O8_O7_O9            45.75(19)         3 0 1 0   108-1 0-1
          O8_O7_O8            84.1(6)           4 0 1 0   105 0 0-1
          O8_O7_O8           131.06(34)         4 0 1 0   106 0 0-1
          O8_O7_O9           120.3(6)           4 0 1 0     1 0 0 0
          O8_O7_O9           113.0(4)           4 0 1 0     7 0 1 0
          O8_O7_O9            59.61(30)         4 0 1 0   102 0 0 0
          O8_O7_O9            62.15(33)         4 0 1 0   108-1 0-1
          O8_O7_O8            47.0(4)         105 0 0-1   106 0 0-1
          O8_O7_O9            62.15(33)       105 0 0-1     1 0 0 0
          O8_O7_O9            59.61(30)       105 0 0-1     7 0 1 0
          O8_O7_O9           113.0(4)         105 0 0-1   102 0 0 0
          O8_O7_O9           120.3(6)         105 0 0-1   108-1 0-1
          O8_O7_O9            45.75(19)       106 0 0-1     1 0 0 0
          O8_O7_O9            45.66(18)       106 0 0-1     7 0 1 0
          O8_O7_O9           129.70(29)       106 0 0-1   102 0 0 0
          O8_O7_O9           138.79(30)       106 0 0-1   108-1 0-1
          O9_O7_O9            91.4(4)           1 0 0 0     7 0 1 0
          O9_O7_O9           174.7(5)           1 0 0 0   102 0 0 0
          O9_O7_O9            93.1(4)           1 0 0 0   108-1 0-1
          O9_O7_O9            84.0(4)           7 0 1 0   102 0 0 0
          O9_O7_O9           174.7(5)           7 0 1 0   108-1 0-1
          O9_O7_O9            91.4(4)         102 0 0 0   108-1 0-1

       Vector         Length           Optr Cell        Neighbor atom coordinates
       O8_BA1         3.039(10)          1 0 0 0      .00000    .00000    .00000
       O8_BA1         3.039(10)          5 0 0 0      .00000    .00000    .50000
       O8_BA2         2.965(9)           2 1 0 0      .22223    .27777    .00000
       O8_BA2         2.965(9)           7 0 1 0      .27777    .22223    .50000
       O8_CU4         3.807(8)           2 1 0 0      .39397    .10603    .00000
       O8_CU4         3.807(8)           7 0 1 0      .10603    .39397    .50000
       O8_IN5         2.0489(16)         1 0 0 0      .24178    .00000    .25000
       O8_IN5         2.0489(16)         2 0 0 0      .00000    .24178    .25000
       O8_SC6         2.0489(16)         1 0 0 0      .24178    .00000    .25000
       O8_SC6         2.0489(16)         2 0 0 0      .00000    .24178    .25000
       O8_O7          3.037(9)           2 1 0 0      .38306    .11694    .22983
       O8_O7          4.2298(4)          3 0 1 0     -.11694    .38306    .22983
       O8_O7          3.037(9)          -5 0 1 1      .11694    .38306    .27017
       O8_O7          4.2298(4)         -8 1 0 1      .38306   -.11694    .27017
       O8_O8          3.100(19)          2 0 0 0     -.12966    .12966    .25000
       O8_O8          4.384(27)          3 0 0 0     -.12966   -.12966    .25000
       O8_O8          3.100(19)          4 0 0 0      .12966   -.12966    .25000
       O8_O8          4.21053(13)        8 0 0-1      .12966    .12966   -.25000
       O8_O8          4.21053(13)        8 0 0 0      .12966    .12966    .75000
       O8_O8          4.069(27)        106 0 0-1      .37034    .37034    .25000
       O8_O9          3.033(10)        103 0 0 0      .25780   -.00049    .50000
       O8_O9          3.027(9)         104-1 0 0      .00049    .25780    .50000
       O8_O9          3.027(9)         105 0-1-1      .25780    .00049    .00000
1Ba3Cu3Sc3InO12                                                     DISAGL   Version MS-DOS 2000-10-12T12:06:39  Page  45


       Vector         Length           Optr Cell        Neighbor atom coordinates
       O8_O9          3.033(10)        106 0 0-1     -.00049    .25780    .00000

            Angle             Degrees         atom 1 loc  atom 3 loc
         BA1_O8_BA1           87.7(4)           1 0 0 0     5 0 0 0
         BA1_O8_BA2           90.168(14)        1 0 0 0     2 1 0 0
         BA1_O8_BA2          170.64(11)         1 0 0 0     7 0 1 0
         BA1_O8_CU4           90.131(11)        1 0 0 0     2 1 0 0
         BA1_O8_CU4          140.21(11)         1 0 0 0     7 0 1 0
         BA1_O8_IN5           87.01(28)         1 0 0 0     1 0 0 0
         BA1_O8_IN5           87.01(28)         1 0 0 0     2 0 0 0
         BA1_O8_SC6           87.01(28)         1 0 0 0     1 0 0 0
         BA1_O8_SC6           87.01(28)         1 0 0 0     2 0 0 0
         BA1_O8_O7           116.38(16)         1 0 0 0     2 1 0 0
         BA1_O8_O7            88.97(16)         1 0 0 0     3 0 1 0
         BA1_O8_O7           121.45(21)         1 0 0 0    -5 0 1 1
         BA1_O8_O7            92.16(14)         1 0 0 0    -8 1 0 1
         BA1_O8_O8            59.34(10)         1 0 0 0     2 0 0 0
         BA1_O8_O8            43.85(18)         1 0 0 0     3 0 0 0
         BA1_O8_O8            59.34(10)         1 0 0 0     4 0 0 0
         BA1_O8_O8            46.15(18)         1 0 0 0     8 0 0-1
         BA1_O8_O8           133.85(18)         1 0 0 0     8 0 0 0
         BA1_O8_O8           136.15(18)         1 0 0 0   106 0 0-1
         BA1_O8_O9           118.5(4)           1 0 0 0   103 0 0 0
         BA1_O8_O9           118.7(4)           1 0 0 0   104-1 0 0
         BA1_O8_O9            61.1(4)           1 0 0 0   105 0-1-1
         BA1_O8_O9            61.0(4)           1 0 0 0   106 0 0-1
         BA1_O8_BA2          170.64(11)         5 0 0 0     2 1 0 0
         BA1_O8_BA2           90.168(14)        5 0 0 0     7 0 1 0
         BA1_O8_CU4          140.21(11)         5 0 0 0     2 1 0 0
         BA1_O8_CU4           90.131(11)        5 0 0 0     7 0 1 0
         BA1_O8_IN5           87.01(28)         5 0 0 0     1 0 0 0
         BA1_O8_IN5           87.01(28)         5 0 0 0     2 0 0 0
         BA1_O8_SC6           87.01(28)         5 0 0 0     1 0 0 0
         BA1_O8_SC6           87.01(28)         5 0 0 0     2 0 0 0
         BA1_O8_O7           121.45(21)         5 0 0 0     2 1 0 0
         BA1_O8_O7            92.16(14)         5 0 0 0     3 0 1 0
         BA1_O8_O7           116.38(16)         5 0 0 0    -5 0 1 1
         BA1_O8_O7            88.97(16)         5 0 0 0    -8 1 0 1
         BA1_O8_O8            59.34(10)         5 0 0 0     2 0 0 0
         BA1_O8_O8            43.85(18)         5 0 0 0     3 0 0 0
         BA1_O8_O8            59.34(10)         5 0 0 0     4 0 0 0
         BA1_O8_O8           133.85(18)         5 0 0 0     8 0 0-1
         BA1_O8_O8            46.15(18)         5 0 0 0     8 0 0 0
         BA1_O8_O8           136.15(18)         5 0 0 0   106 0 0-1
         BA1_O8_O9            61.0(4)           5 0 0 0   103 0 0 0
         BA1_O8_O9            61.1(4)           5 0 0 0   104-1 0 0
         BA1_O8_O9           118.7(4)           5 0 0 0   105 0-1-1
         BA1_O8_O9           118.5(4)           5 0 0 0   106 0 0-1
         BA2_O8_BA2           93.4(4)           2 1 0 0     7 0 1 0
         BA2_O8_CU4           48.85(13)         2 1 0 0     2 1 0 0
         BA2_O8_CU4           85.69(26)         2 1 0 0     7 0 1 0
         BA2_O8_IN5          101.98(28)         2 1 0 0     1 0 0 0
         BA2_O8_IN5           83.78(23)         2 1 0 0     2 0 0 0
         BA2_O8_SC6          101.98(28)         2 1 0 0     1 0 0 0
         BA2_O8_SC6           83.78(23)         2 1 0 0     2 0 0 0
         BA2_O8_O7            67.5(4)           2 1 0 0     2 1 0 0
1Ba3Cu3Sc3InO12                                                     DISAGL   Version MS-DOS 2000-10-12T12:06:39  Page  46


            Angle             Degrees         atom 1 loc  atom 3 loc
         BA2_O8_O7            78.69(12)         2 1 0 0     3 0 1 0
         BA2_O8_O7            57.52(27)         2 1 0 0    -5 0 1 1
         BA2_O8_O7           100.22(18)         2 1 0 0    -8 1 0 1
         BA2_O8_O8           111.91(13)         2 1 0 0     2 0 0 0
         BA2_O8_O8           133.32(19)         2 1 0 0     3 0 0 0
         BA2_O8_O8           126.66(10)         2 1 0 0     4 0 0 0
         BA2_O8_O8            44.76(18)         2 1 0 0     8 0 0-1
         BA2_O8_O8           135.24(18)         2 1 0 0     8 0 0 0
         BA2_O8_O8            46.68(19)         2 1 0 0   106 0 0-1
         BA2_O8_O9           127.6(6)           2 1 0 0   103 0 0 0
         BA2_O8_O9           112.5(5)           2 1 0 0   104-1 0 0
         BA2_O8_O9            67.78(21)         2 1 0 0   105 0-1-1
         BA2_O8_O9            52.91(22)         2 1 0 0   106 0 0-1
         BA2_O8_CU4           85.69(26)         7 0 1 0     2 1 0 0
         BA2_O8_CU4           48.85(13)         7 0 1 0     7 0 1 0
         BA2_O8_IN5           83.78(23)         7 0 1 0     1 0 0 0
         BA2_O8_IN5          101.98(28)         7 0 1 0     2 0 0 0
         BA2_O8_SC6           83.78(23)         7 0 1 0     1 0 0 0
         BA2_O8_SC6          101.98(28)         7 0 1 0     2 0 0 0
         BA2_O8_O7            57.52(27)         7 0 1 0     2 1 0 0
         BA2_O8_O7           100.22(18)         7 0 1 0     3 0 1 0
         BA2_O8_O7            67.5(4)           7 0 1 0    -5 0 1 1
         BA2_O8_O7            78.69(12)         7 0 1 0    -8 1 0 1
         BA2_O8_O8           126.66(10)         7 0 1 0     2 0 0 0
         BA2_O8_O8           133.32(19)         7 0 1 0     3 0 0 0
         BA2_O8_O8           111.91(13)         7 0 1 0     4 0 0 0
         BA2_O8_O8           135.24(18)         7 0 1 0     8 0 0-1
         BA2_O8_O8            44.76(18)         7 0 1 0     8 0 0 0
         BA2_O8_O8            46.68(19)         7 0 1 0   106 0 0-1
         BA2_O8_O9            52.91(22)         7 0 1 0   103 0 0 0
         BA2_O8_O9            67.78(21)         7 0 1 0   104-1 0 0
         BA2_O8_O9           112.5(5)           7 0 1 0   105 0-1-1
         BA2_O8_O9           127.6(6)           7 0 1 0   106 0 0-1
         CU4_O8_CU4          115.40(35)         2 1 0 0     7 0 1 0
         CU4_O8_IN5           53.21(18)         2 1 0 0     1 0 0 0
         CU4_O8_IN5          132.55(33)         2 1 0 0     2 0 0 0
         CU4_O8_SC6           53.21(18)         2 1 0 0     1 0 0 0
         CU4_O8_SC6          132.55(33)         2 1 0 0     2 0 0 0
         CU4_O8_O7            30.44(19)         2 1 0 0     2 1 0 0
         CU4_O8_O7           127.53(19)         2 1 0 0     3 0 1 0
         CU4_O8_O7            98.4(4)           2 1 0 0    -5 0 1 1
         CU4_O8_O7            51.41(17)         2 1 0 0    -8 1 0 1
         CU4_O8_O8           146.09(10)         2 1 0 0     2 0 0 0
         CU4_O8_O8           122.30(17)         2 1 0 0     3 0 0 0
         CU4_O8_O8            85.74(16)         2 1 0 0     4 0 0 0
         CU4_O8_O8            56.43(8)          2 1 0 0     8 0 0-1
         CU4_O8_O8           123.57(8)          2 1 0 0     8 0 0 0
         CU4_O8_O8            57.70(17)         2 1 0 0   106 0 0-1
         CU4_O8_O9            85.8(4)           2 1 0 0   103 0 0 0
         CU4_O8_O9           147.7(6)           2 1 0 0   104-1 0 0
         CU4_O8_O9            32.60(33)         2 1 0 0   105 0-1-1
         CU4_O8_O9            94.55(17)         2 1 0 0   106 0 0-1
         CU4_O8_IN5          132.55(33)         7 0 1 0     1 0 0 0
         CU4_O8_IN5           53.21(18)         7 0 1 0     2 0 0 0
         CU4_O8_SC6          132.55(33)         7 0 1 0     1 0 0 0
         CU4_O8_SC6           53.21(18)         7 0 1 0     2 0 0 0
1Ba3Cu3Sc3InO12                                                     DISAGL   Version MS-DOS 2000-10-12T12:06:39  Page  47


            Angle             Degrees         atom 1 loc  atom 3 loc
         CU4_O8_O7            98.4(4)           7 0 1 0     2 1 0 0
         CU4_O8_O7            51.41(17)         7 0 1 0     3 0 1 0
         CU4_O8_O7            30.44(19)         7 0 1 0    -5 0 1 1
         CU4_O8_O7           127.53(19)         7 0 1 0    -8 1 0 1
         CU4_O8_O8            85.74(16)         7 0 1 0     2 0 0 0
         CU4_O8_O8           122.30(17)         7 0 1 0     3 0 0 0
         CU4_O8_O8           146.09(10)         7 0 1 0     4 0 0 0
         CU4_O8_O8           123.57(8)          7 0 1 0     8 0 0-1
         CU4_O8_O8            56.43(8)          7 0 1 0     8 0 0 0
         CU4_O8_O8            57.70(17)         7 0 1 0   106 0 0-1
         CU4_O8_O9            94.55(17)         7 0 1 0   103 0 0 0
         CU4_O8_O9            32.60(33)         7 0 1 0   104-1 0 0
         CU4_O8_O9           147.7(6)           7 0 1 0   105 0-1-1
         CU4_O8_O9            85.8(4)           7 0 1 0   106 0 0-1
         IN5_O8_IN5          171.7(8)           1 0 0 0     2 0 0 0
         IN5_O8_SC6             .000(0)         1 0 0 0     1 0 0 0
         IN5_O8_SC6          171.7(8)           1 0 0 0     2 0 0 0
         IN5_O8_O7            46.36(18)         1 0 0 0     2 1 0 0
         IN5_O8_O7           175.9(4)           1 0 0 0     3 0 1 0
         IN5_O8_O7           141.9(7)           1 0 0 0    -5 0 1 1
         IN5_O8_O7             5.44(30)         1 0 0 0    -8 1 0 1
         IN5_O8_O8           130.9(4)           1 0 0 0     2 0 0 0
         IN5_O8_O8            85.9(4)           1 0 0 0     3 0 0 0
         IN5_O8_O8            40.9(4)           1 0 0 0     4 0 0 0
         IN5_O8_O8            90.000(0)         1 0 0 0     8 0 0-1
         IN5_O8_O8            90.000(0)         1 0 0 0     8 0 0 0
         IN5_O8_O8            94.1(4)           1 0 0 0   106 0 0-1
         IN5_O8_O9            44.08(16)         1 0 0 0   103 0 0 0
         IN5_O8_O9           135.76(24)         1 0 0 0   104-1 0 0
         IN5_O8_O9            44.21(16)         1 0 0 0   105 0-1-1
         IN5_O8_O9           135.85(24)         1 0 0 0   106 0 0-1
         IN5_O8_SC6          171.7(8)           2 0 0 0     1 0 0 0
         IN5_O8_SC6             .000(0)         2 0 0 0     2 0 0 0
         IN5_O8_O7           141.9(7)           2 0 0 0     2 1 0 0
         IN5_O8_O7             5.44(30)         2 0 0 0     3 0 1 0
         IN5_O8_O7            46.36(18)         2 0 0 0    -5 0 1 1
         IN5_O8_O7           175.9(4)           2 0 0 0    -8 1 0 1
         IN5_O8_O8            40.9(4)           2 0 0 0     2 0 0 0
         IN5_O8_O8            85.9(4)           2 0 0 0     3 0 0 0
         IN5_O8_O8           130.9(4)           2 0 0 0     4 0 0 0
         IN5_O8_O8            90.000(0)         2 0 0 0     8 0 0-1
         IN5_O8_O8            90.000(0)         2 0 0 0     8 0 0 0
         IN5_O8_O8            94.1(4)           2 0 0 0   106 0 0-1
         IN5_O8_O9           135.85(24)         2 0 0 0   103 0 0 0
         IN5_O8_O9            44.21(16)         2 0 0 0   104-1 0 0
         IN5_O8_O9           135.76(24)         2 0 0 0   105 0-1-1
         IN5_O8_O9            44.08(16)         2 0 0 0   106 0 0-1
         SC6_O8_SC6          171.7(8)           1 0 0 0     2 0 0 0
         SC6_O8_O7            46.36(18)         1 0 0 0     2 1 0 0
         SC6_O8_O7           175.9(4)           1 0 0 0     3 0 1 0
         SC6_O8_O7           141.9(7)           1 0 0 0    -5 0 1 1
         SC6_O8_O7             5.44(30)         1 0 0 0    -8 1 0 1
         SC6_O8_O8           130.9(4)           1 0 0 0     2 0 0 0
         SC6_O8_O8            85.9(4)           1 0 0 0     3 0 0 0
         SC6_O8_O8            40.9(4)           1 0 0 0     4 0 0 0
         SC6_O8_O8            90.000(0)         1 0 0 0     8 0 0-1
1Ba3Cu3Sc3InO12                                                     DISAGL   Version MS-DOS 2000-10-12T12:06:39  Page  48


            Angle             Degrees         atom 1 loc  atom 3 loc
         SC6_O8_O8            90.000(0)         1 0 0 0     8 0 0 0
         SC6_O8_O8            94.1(4)           1 0 0 0   106 0 0-1
         SC6_O8_O9            44.08(16)         1 0 0 0   103 0 0 0
         SC6_O8_O9           135.76(24)         1 0 0 0   104-1 0 0
         SC6_O8_O9            44.21(16)         1 0 0 0   105 0-1-1
         SC6_O8_O9           135.85(24)         1 0 0 0   106 0 0-1
         SC6_O8_O7           141.9(7)           2 0 0 0     2 1 0 0
         SC6_O8_O7             5.44(30)         2 0 0 0     3 0 1 0
         SC6_O8_O7            46.36(18)         2 0 0 0    -5 0 1 1
         SC6_O8_O7           175.9(4)           2 0 0 0    -8 1 0 1
         SC6_O8_O8            40.9(4)           2 0 0 0     2 0 0 0
         SC6_O8_O8            85.9(4)           2 0 0 0     3 0 0 0
         SC6_O8_O8           130.9(4)           2 0 0 0     4 0 0 0
         SC6_O8_O8            90.000(0)         2 0 0 0     8 0 0-1
         SC6_O8_O8            90.000(0)         2 0 0 0     8 0 0 0
         SC6_O8_O8            94.1(4)           2 0 0 0   106 0 0-1
         SC6_O8_O9           135.85(24)         2 0 0 0   103 0 0 0
         SC6_O8_O9            44.21(16)         2 0 0 0   104-1 0 0
         SC6_O8_O9           135.76(24)         2 0 0 0   105 0-1-1
         SC6_O8_O9            44.08(16)         2 0 0 0   106 0 0-1
          O7_O8_O7           136.8(4)           2 1 0 0     3 0 1 0
          O7_O8_O7            95.9(6)           2 1 0 0    -5 0 1 1
          O7_O8_O7            41.7(4)           2 1 0 0    -8 1 0 1
          O7_O8_O8           175.70(23)         2 1 0 0     2 0 0 0
          O7_O8_O8           132.04(31)         2 1 0 0     3 0 0 0
          O7_O8_O8            87.13(31)         2 1 0 0     4 0 0 0
          O7_O8_O8            86.79(18)         2 1 0 0     8 0 0-1
          O7_O8_O8            93.21(18)         2 1 0 0     8 0 0 0
          O7_O8_O8            47.96(31)         2 1 0 0   106 0 0-1
          O7_O8_O9            60.63(35)         2 1 0 0   103 0 0 0
          O7_O8_O9           125.0(5)           2 1 0 0   104-1 0 0
          O7_O8_O9            55.32(34)         2 1 0 0   105 0-1-1
          O7_O8_O9           119.9(5)           2 1 0 0   106 0 0-1
          O7_O8_O7            41.7(4)           3 0 1 0    -5 0 1 1
          O7_O8_O7           178.44(34)         3 0 1 0    -8 1 0 1
          O7_O8_O8            45.82(17)         3 0 1 0     2 0 0 0
          O7_O8_O8            90.78(17)         3 0 1 0     3 0 0 0
          O7_O8_O8           135.73(17)         3 0 1 0     4 0 0 0
          O7_O8_O8            87.70(13)         3 0 1 0     8 0 0-1
          O7_O8_O8            92.30(13)         3 0 1 0     8 0 0 0
          O7_O8_O8            89.22(17)         3 0 1 0   106 0 0-1
          O7_O8_O9           138.34(23)         3 0 1 0   103 0 0 0
          O7_O8_O9            46.38(23)         3 0 1 0   104-1 0 0
          O7_O8_O9           133.63(22)         3 0 1 0   105 0-1-1
          O7_O8_O9            41.67(24)         3 0 1 0   106 0 0-1
          O7_O8_O7           136.8(4)          -5 0 1 1    -8 1 0 1
          O7_O8_O8            87.13(31)        -5 0 1 1     2 0 0 0
          O7_O8_O8           132.04(31)        -5 0 1 1     3 0 0 0
          O7_O8_O8           175.70(23)        -5 0 1 1     4 0 0 0
          O7_O8_O8            93.21(18)        -5 0 1 1     8 0 0-1
          O7_O8_O8            86.79(18)        -5 0 1 1     8 0 0 0
          O7_O8_O8            47.96(31)        -5 0 1 1   106 0 0-1
          O7_O8_O9           119.9(5)          -5 0 1 1   103 0 0 0
          O7_O8_O9            55.32(34)        -5 0 1 1   104-1 0 0
          O7_O8_O9           125.0(5)          -5 0 1 1   105 0-1-1
          O7_O8_O9            60.63(35)        -5 0 1 1   106 0 0-1
1Ba3Cu3Sc3InO12                                                     DISAGL   Version MS-DOS 2000-10-12T12:06:39  Page  49


            Angle             Degrees         atom 1 loc  atom 3 loc
          O7_O8_O8           135.73(17)        -8 1 0 1     2 0 0 0
          O7_O8_O8            90.78(17)        -8 1 0 1     3 0 0 0
          O7_O8_O8            45.82(17)        -8 1 0 1     4 0 0 0
          O7_O8_O8            92.30(13)        -8 1 0 1     8 0 0-1
          O7_O8_O8            87.70(13)        -8 1 0 1     8 0 0 0
          O7_O8_O8            89.22(17)        -8 1 0 1   106 0 0-1
          O7_O8_O9            41.67(24)        -8 1 0 1   103 0 0 0
          O7_O8_O9           133.63(22)        -8 1 0 1   104-1 0 0
          O7_O8_O9            46.38(23)        -8 1 0 1   105 0-1-1
          O7_O8_O9           138.34(23)        -8 1 0 1   106 0 0-1
          O8_O8_O8            45.000(0)         2 0 0 0     3 0 0 0
          O8_O8_O8            90.000(0)         2 0 0 0     4 0 0 0
          O8_O8_O8            90.000(0)         2 0 0 0     8 0 0-1
          O8_O8_O8            90.000(0)         2 0 0 0     8 0 0 0
          O8_O8_O8           135.000(0)         2 0 0 0   106 0 0-1
          O8_O8_O9           120.3(5)           2 0 0 0   103 0 0 0
          O8_O8_O9            59.33(31)         2 0 0 0   104-1 0 0
          O8_O8_O9           120.4(5)           2 0 0 0   105 0-1-1
          O8_O8_O9            59.14(31)         2 0 0 0   106 0 0-1
          O8_O8_O8            45.000(0)         3 0 0 0     4 0 0 0
          O8_O8_O8            90.000(0)         3 0 0 0     8 0 0-1
          O8_O8_O8            90.000(0)         3 0 0 0     8 0 0 0
          O8_O8_O8           180.000(0)         3 0 0 0   106 0 0-1
          O8_O8_O9            89.7(5)           3 0 0 0   103 0 0 0
          O8_O8_O9            89.8(5)           3 0 0 0   104-1 0 0
          O8_O8_O9            89.8(5)           3 0 0 0   105 0-1-1
          O8_O8_O9            89.7(5)           3 0 0 0   106 0 0-1
          O8_O8_O8            90.000(0)         4 0 0 0     8 0 0-1
          O8_O8_O8            90.000(0)         4 0 0 0     8 0 0 0
          O8_O8_O8           135.000(0)         4 0 0 0   106 0 0-1
          O8_O8_O9            59.14(31)         4 0 0 0   103 0 0 0
          O8_O8_O9           120.4(5)           4 0 0 0   104-1 0 0
          O8_O8_O9            59.33(31)         4 0 0 0   105 0-1-1
          O8_O8_O9           120.3(5)           4 0 0 0   106 0 0-1
          O8_O8_O8           180.000(0)         8 0 0-1     8 0 0 0
          O8_O8_O8            90.000(0)         8 0 0-1   106 0 0-1
          O8_O8_O9           133.96(18)         8 0 0-1   103 0 0 0
          O8_O8_O9           134.07(17)         8 0 0-1   104-1 0 0
          O8_O8_O9            45.93(17)         8 0 0-1   105 0-1-1
          O8_O8_O9            46.04(18)         8 0 0-1   106 0 0-1
          O8_O8_O8            90.000(0)         8 0 0 0   106 0 0-1
          O8_O8_O9            46.04(18)         8 0 0 0   103 0 0 0
          O8_O8_O9            45.93(17)         8 0 0 0   104-1 0 0
          O8_O8_O9           134.07(17)         8 0 0 0   105 0-1-1
          O8_O8_O9           133.96(18)         8 0 0 0   106 0 0-1
          O8_O8_O9            90.3(5)         106 0 0-1   103 0 0 0
          O8_O8_O9            90.2(5)         106 0 0-1   104-1 0 0
          O8_O8_O9            90.2(5)         106 0 0-1   105 0-1-1
          O8_O8_O9            90.3(5)         106 0 0-1   106 0 0-1
          O9_O8_O9            91.97(33)       103 0 0 0   104-1 0 0
          O9_O8_O9            88.03(32)       103 0 0 0   105 0-1-1
          O9_O8_O9           179.361(10)      103 0 0 0   106 0 0-1
          O9_O8_O9           179.674(5)       104-1 0 0   105 0-1-1
          O9_O8_O9            88.03(32)       104-1 0 0   106 0 0-1
          O9_O8_O9            91.97(33)       105 0-1-1   106 0 0-1
1Ba3Cu3Sc3InO12                                                     DISAGL   Version MS-DOS 2000-10-12T12:06:39  Page  50


       Vector         Length           Optr Cell        Neighbor atom coordinates
       O9_BA1         3.082(17)        105 0 0-1      .50000    .50000    .00000
       O9_BA2         3.342(8)           1 0 0 0      .27777    .77777    .00000
       O9_BA2         2.673(8)           2 1 0 0      .22223    .27777    .00000
       O9_CU3         3.580(14)          2 0 0 0      .00000    .50000    .25000
       O9_CU3         3.580(14)          6 0 1-1      .00000    .50000   -.25000
       O9_CU4         2.059(15)          1 0 0 0      .10603    .60603    .00000
       O9_CU4         4.353(17)          3 0 1 0     -.10603    .39397    .00000
       O9_IN5         2.1140(15)       103 0 0-1      .25822    .50000   -.25000
       O9_IN5         2.1140(15)       105 0 0-1      .25822    .50000    .25000
       O9_SC6         2.1140(15)       103 0 0-1      .25822    .50000   -.25000
       O9_SC6         2.1140(15)       105 0 0-1      .25822    .50000    .25000
       O9_O7          2.815(13)          1 0 0 0      .11694    .61694    .22983
       O9_O7          3.064(12)          7 0 1-1      .11694    .38306   -.27017
       O9_O7          2.815(13)         -3 0 0 0      .11694    .61694   -.22983
       O9_O7          3.064(12)         -5 0 1 1      .11694    .38306    .27017
       O9_O8          3.027(9)         102 0 0-1      .37034    .62966   -.25000
       O9_O8          3.033(10)        103 0 0-1      .37034    .37034   -.25000
       O9_O8          3.027(9)         105 0 0-1      .37034    .62966    .25000
       O9_O8          3.033(10)        106 0 0-1      .37034    .37034    .25000
       O9_O9          4.358(25)          2 1 0 0      .49951    .24220    .00000
       O9_O9          4.358(25)          4 0 1 0      .50049    .75780    .00000
       O9_O9          4.21054(13)        7 0 1-1      .24220    .49951   -.50000
       O9_O9          4.21054(13)        7 0 1 0      .24220    .49951    .50000
       O9_O9          4.102(26)        106 0 0-1     -.00049    .25780    .00000
       O9_O9          4.086(27)        108-1 0-1      .00049    .74220    .00000
 **** More than 24 Interatomic distances found ****
 Angles will be calculated between the first 25

            Angle             Degrees         atom 1 loc  atom 3 loc
         BA1_O9_BA2           82.80(32)       105 0 0-1     1 0 0 0
         BA1_O9_BA2           95.0(4)         105 0 0-1     2 1 0 0
         BA1_O9_CU3          143.97(16)       105 0 0-1     2 0 0 0
         BA1_O9_CU3          143.97(16)       105 0 0-1     6 0 1-1
         BA1_O9_CU4          142.3(4)         105 0 0-1     1 0 0 0
         BA1_O9_CU4          162.88(25)       105 0 0-1     3 0 1 0
         BA1_O9_IN5           84.8(5)         105 0 0-1   103 0 0-1
         BA1_O9_IN5           84.8(5)         105 0 0-1   105 0 0-1
         BA1_O9_SC6           84.8(5)         105 0 0-1   103 0 0-1
         BA1_O9_SC6           84.8(5)         105 0 0-1   105 0 0-1
         BA1_O9_O7           122.2(5)         105 0 0-1     1 0 0 0
         BA1_O9_O7           119.2(5)         105 0 0-1     7 0 1-1
         BA1_O9_O7           122.2(5)         105 0 0-1    -3 0 0 0
         BA1_O9_O7           119.2(5)         105 0 0-1    -5 0 1 1
         BA1_O9_O8            59.7(5)         105 0 0-1   102 0 0-1
         BA1_O9_O8            59.6(5)         105 0 0-1   103 0 0-1
         BA1_O9_O8            59.7(5)         105 0 0-1   105 0 0-1
         BA1_O9_O8            59.6(5)         105 0 0-1   106 0 0-1
         BA1_O9_O9            45.000(0)       105 0 0-1     2 1 0 0
         BA1_O9_O9            45.000(0)       105 0 0-1     4 0 1 0
         BA1_O9_O9            90.000(1)       105 0 0-1     7 0 1-1
         BA1_O9_O9            90.000(1)       105 0 0-1     7 0 1 0
         BA1_O9_O9           134.89(14)       105 0 0-1   106 0 0-1
         BA1_O9_O9           135.11(14)       105 0 0-1   108-1 0-1
         BA2_O9_BA2          177.8(7)           1 0 0 0     2 1 0 0
         BA2_O9_CU3           96.00(27)         1 0 0 0     2 0 0 0
         BA2_O9_CU3           96.00(27)         1 0 0 0     6 0 1-1
         BA2_O9_CU4           59.53(18)         1 0 0 0     1 0 0 0
1Ba3Cu3Sc3InO12                                                     DISAGL   Version MS-DOS 2000-10-12T12:06:39  Page  51


            Angle             Degrees         atom 1 loc  atom 3 loc
         BA2_O9_CU4          114.3(4)           1 0 0 0     3 0 1 0
         BA2_O9_IN5           89.50(22)         1 0 0 0   103 0 0-1
         BA2_O9_IN5           89.50(22)         1 0 0 0   105 0 0-1
         BA2_O9_SC6           89.50(22)         1 0 0 0   103 0 0-1
         BA2_O9_SC6           89.50(22)         1 0 0 0   105 0 0-1
         BA2_O9_O7            64.99(26)         1 0 0 0     1 0 0 0
         BA2_O9_O7           121.1(4)           1 0 0 0     7 0 1-1
         BA2_O9_O7            64.99(26)         1 0 0 0    -3 0 0 0
         BA2_O9_O7           121.1(4)           1 0 0 0    -5 0 1 1
         BA2_O9_O8            55.23(18)         1 0 0 0   102 0 0-1
         BA2_O9_O8           116.4(5)           1 0 0 0   103 0 0-1
         BA2_O9_O8            55.23(18)         1 0 0 0   105 0 0-1
         BA2_O9_O8           116.4(5)           1 0 0 0   106 0 0-1
         BA2_O9_O9           127.80(32)         1 0 0 0     2 1 0 0
         BA2_O9_O9            37.80(32)         1 0 0 0     4 0 1 0
         BA2_O9_O9            90.16(20)         1 0 0 0     7 0 1-1
         BA2_O9_O9            90.16(20)         1 0 0 0     7 0 1 0
         BA2_O9_O9           142.31(30)         1 0 0 0   106 0 0-1
         BA2_O9_O9            52.31(30)         1 0 0 0   108-1 0-1
         BA2_O9_CU3           85.76(32)         2 1 0 0     2 0 0 0
         BA2_O9_CU3           85.76(32)         2 1 0 0     6 0 1-1
         BA2_O9_CU4          122.7(7)           2 1 0 0     1 0 0 0
         BA2_O9_CU4           67.87(32)         2 1 0 0     3 0 1 0
         BA2_O9_IN5           90.31(21)         2 1 0 0   103 0 0-1
         BA2_O9_IN5           90.31(21)         2 1 0 0   105 0 0-1
         BA2_O9_SC6           90.31(21)         2 1 0 0   103 0 0-1
         BA2_O9_SC6           90.31(21)         2 1 0 0   105 0 0-1
         BA2_O9_O7           116.4(6)           2 1 0 0     1 0 0 0
         BA2_O9_O7            60.01(19)         2 1 0 0     7 0 1-1
         BA2_O9_O7           116.4(6)           2 1 0 0    -3 0 0 0
         BA2_O9_O7            60.01(19)         2 1 0 0    -5 0 1 1
         BA2_O9_O8           123.6(5)           2 1 0 0   102 0 0-1
         BA2_O9_O8            62.24(22)         2 1 0 0   103 0 0-1
         BA2_O9_O8           123.6(5)           2 1 0 0   105 0 0-1
         BA2_O9_O8            62.24(22)         2 1 0 0   106 0 0-1
         BA2_O9_O9            50.0(4)           2 1 0 0     2 1 0 0
         BA2_O9_O9           140.0(4)           2 1 0 0     4 0 1 0
         BA2_O9_O9            89.84(20)         2 1 0 0     7 0 1-1
         BA2_O9_O9            89.84(20)         2 1 0 0     7 0 1 0
         BA2_O9_O9            39.9(4)           2 1 0 0   106 0 0-1
         BA2_O9_O9           129.9(4)           2 1 0 0   108-1 0-1
         CU3_O9_CU3           72.05(33)         2 0 0 0     6 0 1-1
         CU3_O9_CU4           50.34(29)         2 0 0 0     1 0 0 0
         CU3_O9_CU4           39.30(17)         2 0 0 0     3 0 1 0
         CU3_O9_IN5          131.2(6)           2 0 0 0   103 0 0-1
         CU3_O9_IN5           59.17(30)         2 0 0 0   105 0 0-1
         CU3_O9_SC6          131.2(6)           2 0 0 0   103 0 0-1
         CU3_O9_SC6           59.17(30)         2 0 0 0   105 0 0-1
         CU3_O9_O7            33.5(4)           2 0 0 0     1 0 0 0
         CU3_O9_O7            92.3(5)           2 0 0 0     7 0 1-1
         CU3_O9_O7            88.6(5)           2 0 0 0    -3 0 0 0
         CU3_O9_O7            33.63(35)         2 0 0 0    -5 0 1 1
         CU3_O9_O8           145.0(6)           2 0 0 0   102 0 0-1
         CU3_O9_O8           144.7(5)           2 0 0 0   103 0 0-1
         CU3_O9_O8            90.06(26)         2 0 0 0   105 0 0-1
         CU3_O9_O8            89.96(26)         2 0 0 0   106 0 0-1
1Ba3Cu3Sc3InO12                                                     DISAGL   Version MS-DOS 2000-10-12T12:06:39  Page  52


            Angle             Degrees         atom 1 loc  atom 3 loc
         CU3_O9_O9           124.72(22)         2 0 0 0     2 1 0 0
         CU3_O9_O9           125.04(21)         2 0 0 0     4 0 1 0
         CU3_O9_O9           126.02(16)         2 0 0 0     7 0 1-1
         CU3_O9_O9            53.97(16)         2 0 0 0     7 0 1 0
         CU3_O9_O9            55.04(13)         2 0 0 0   106 0 0-1
         CU3_O9_O9            55.20(14)         2 0 0 0   108-1 0-1
         CU3_O9_CU4           50.34(29)         6 0 1-1     1 0 0 0
         CU3_O9_CU4           39.30(17)         6 0 1-1     3 0 1 0
         CU3_O9_IN5           59.17(30)         6 0 1-1   103 0 0-1
         CU3_O9_IN5          131.2(6)           6 0 1-1   105 0 0-1
         CU3_O9_SC6           59.17(30)         6 0 1-1   103 0 0-1
         CU3_O9_SC6          131.2(6)           6 0 1-1   105 0 0-1
         CU3_O9_O7            88.6(5)           6 0 1-1     1 0 0 0
         CU3_O9_O7            33.63(35)         6 0 1-1     7 0 1-1
         CU3_O9_O7            33.5(4)           6 0 1-1    -3 0 0 0
         CU3_O9_O7            92.3(5)           6 0 1-1    -5 0 1 1
         CU3_O9_O8            90.06(26)         6 0 1-1   102 0 0-1
         CU3_O9_O8            89.96(26)         6 0 1-1   103 0 0-1
         CU3_O9_O8           145.0(6)           6 0 1-1   105 0 0-1
         CU3_O9_O8           144.7(5)           6 0 1-1   106 0 0-1
         CU3_O9_O9           124.72(22)         6 0 1-1     2 1 0 0
         CU3_O9_O9           125.04(21)         6 0 1-1     4 0 1 0
         CU3_O9_O9            53.97(16)         6 0 1-1     7 0 1-1
         CU3_O9_O9           126.02(16)         6 0 1-1     7 0 1 0
         CU3_O9_O9            55.04(13)         6 0 1-1   106 0 0-1
         CU3_O9_O9            55.20(14)         6 0 1-1   108-1 0-1
         CU4_O9_CU4           54.8(4)           1 0 0 0     3 0 1 0
         CU4_O9_IN5           94.2(4)           1 0 0 0   103 0 0-1
         CU4_O9_IN5           94.2(4)           1 0 0 0   105 0 0-1
         CU4_O9_SC6           94.2(4)           1 0 0 0   103 0 0-1
         CU4_O9_SC6           94.2(4)           1 0 0 0   105 0 0-1
         CU4_O9_O7            43.68(25)         1 0 0 0     1 0 0 0
         CU4_O9_O7            83.9(6)           1 0 0 0     7 0 1-1
         CU4_O9_O7            43.68(25)         1 0 0 0    -3 0 0 0
         CU4_O9_O7            83.9(6)           1 0 0 0    -5 0 1 1
         CU4_O9_O8            95.02(35)         1 0 0 0   102 0 0-1
         CU4_O9_O8           135.51(28)         1 0 0 0   103 0 0-1
         CU4_O9_O8            95.02(35)         1 0 0 0   105 0 0-1
         CU4_O9_O8           135.51(28)         1 0 0 0   106 0 0-1
         CU4_O9_O9           172.7(4)           1 0 0 0     2 1 0 0
         CU4_O9_O9            97.3(4)           1 0 0 0     4 0 1 0
         CU4_O9_O9            90.10(13)         1 0 0 0     7 0 1-1
         CU4_O9_O9            90.10(13)         1 0 0 0     7 0 1 0
         CU4_O9_O9            82.78(33)         1 0 0 0   106 0 0-1
         CU4_O9_O9             7.22(33)         1 0 0 0   108-1 0-1
         CU4_O9_IN5           94.9(4)           3 0 1 0   103 0 0-1
         CU4_O9_IN5           94.9(4)           3 0 1 0   105 0 0-1
         CU4_O9_SC6           94.9(4)           3 0 1 0   103 0 0-1
         CU4_O9_SC6           94.9(4)           3 0 1 0   105 0 0-1
         CU4_O9_O7            68.7(5)           3 0 1 0     1 0 0 0
         CU4_O9_O7            53.0(4)           3 0 1 0     7 0 1-1
         CU4_O9_O7            68.7(5)           3 0 1 0    -3 0 0 0
         CU4_O9_O7            53.0(4)           3 0 1 0    -5 0 1 1
         CU4_O9_O8           129.3(4)           3 0 1 0   102 0 0-1
         CU4_O9_O8           109.4(5)           3 0 1 0   103 0 0-1
         CU4_O9_O8           129.3(4)           3 0 1 0   105 0 0-1
1Ba3Cu3Sc3InO12                                                     DISAGL   Version MS-DOS 2000-10-12T12:06:39  Page  53


            Angle             Degrees         atom 1 loc  atom 3 loc
         CU4_O9_O8           109.4(5)           3 0 1 0   106 0 0-1
         CU4_O9_O9           117.88(25)         3 0 1 0     2 1 0 0
         CU4_O9_O9           152.12(25)         3 0 1 0     4 0 1 0
         CU4_O9_O9            89.95(6)          3 0 1 0     7 0 1-1
         CU4_O9_O9            89.95(6)          3 0 1 0     7 0 1 0
         CU4_O9_O9            27.99(12)         3 0 1 0   106 0 0-1
         CU4_O9_O9            62.01(12)         3 0 1 0   108-1 0-1
         IN5_O9_IN5          169.6(9)         103 0 0-1   105 0 0-1
         IN5_O9_SC6             .000(0)       103 0 0-1   103 0 0-1
         IN5_O9_SC6          169.6(9)         103 0 0-1   105 0 0-1
         IN5_O9_O7           137.2(5)         103 0 0-1     1 0 0 0
         IN5_O9_O7            45.86(20)       103 0 0-1     7 0 1-1
         IN5_O9_O7            50.57(22)       103 0 0-1    -3 0 0 0
         IN5_O9_O7           141.5(5)         103 0 0-1    -5 0 1 1
         IN5_O9_O8            42.51(19)       103 0 0-1   102 0 0-1
         IN5_O9_O8            42.40(20)       103 0 0-1   103 0 0-1
         IN5_O9_O8           130.4(6)         103 0 0-1   105 0 0-1
         IN5_O9_O8           130.1(6)         103 0 0-1   106 0 0-1
         IN5_O9_O9            86.2(4)         103 0 0-1     2 1 0 0
         IN5_O9_O9            86.43(35)       103 0 0-1     4 0 1 0
         IN5_O9_O9             5.2(5)         103 0 0-1     7 0 1-1
         IN5_O9_O9           174.8(5)         103 0 0-1     7 0 1 0
         IN5_O9_O9            93.56(35)       103 0 0-1   106 0 0-1
         IN5_O9_O9            93.8(4)         103 0 0-1   108-1 0-1
         IN5_O9_SC6          169.6(9)         105 0 0-1   103 0 0-1
         IN5_O9_SC6             .000(0)       105 0 0-1   105 0 0-1
         IN5_O9_O7            50.57(22)       105 0 0-1     1 0 0 0
         IN5_O9_O7           141.5(5)         105 0 0-1     7 0 1-1
         IN5_O9_O7           137.2(5)         105 0 0-1    -3 0 0 0
         IN5_O9_O7            45.86(20)       105 0 0-1    -5 0 1 1
         IN5_O9_O8           130.4(6)         105 0 0-1   102 0 0-1
         IN5_O9_O8           130.1(6)         105 0 0-1   103 0 0-1
         IN5_O9_O8            42.51(19)       105 0 0-1   105 0 0-1
         IN5_O9_O8            42.40(20)       105 0 0-1   106 0 0-1
         IN5_O9_O9            86.2(4)         105 0 0-1     2 1 0 0
         IN5_O9_O9            86.43(35)       105 0 0-1     4 0 1 0
         IN5_O9_O9           174.8(5)         105 0 0-1     7 0 1-1
         IN5_O9_O9             5.2(5)         105 0 0-1     7 0 1 0
         IN5_O9_O9            93.56(35)       105 0 0-1   106 0 0-1
         IN5_O9_O9            93.8(4)         105 0 0-1   108-1 0-1
         SC6_O9_SC6          169.6(9)         103 0 0-1   105 0 0-1
         SC6_O9_O7           137.2(5)         103 0 0-1     1 0 0 0
         SC6_O9_O7            45.86(20)       103 0 0-1     7 0 1-1
         SC6_O9_O7            50.57(22)       103 0 0-1    -3 0 0 0
         SC6_O9_O7           141.5(5)         103 0 0-1    -5 0 1 1
         SC6_O9_O8            42.51(19)       103 0 0-1   102 0 0-1
         SC6_O9_O8            42.40(20)       103 0 0-1   103 0 0-1
         SC6_O9_O8           130.4(6)         103 0 0-1   105 0 0-1
         SC6_O9_O8           130.1(6)         103 0 0-1   106 0 0-1
         SC6_O9_O9            86.2(4)         103 0 0-1     2 1 0 0
         SC6_O9_O9            86.43(35)       103 0 0-1     4 0 1 0
         SC6_O9_O9             5.2(5)         103 0 0-1     7 0 1-1
         SC6_O9_O9           174.8(5)         103 0 0-1     7 0 1 0
         SC6_O9_O9            93.56(35)       103 0 0-1   106 0 0-1
         SC6_O9_O9            93.8(4)         103 0 0-1   108-1 0-1
         SC6_O9_O7            50.57(22)       105 0 0-1     1 0 0 0
1Ba3Cu3Sc3InO12                                                     DISAGL   Version MS-DOS 2000-10-12T12:06:39  Page  54


            Angle             Degrees         atom 1 loc  atom 3 loc
         SC6_O9_O7           141.5(5)         105 0 0-1     7 0 1-1
         SC6_O9_O7           137.2(5)         105 0 0-1    -3 0 0 0
         SC6_O9_O7            45.86(20)       105 0 0-1    -5 0 1 1
         SC6_O9_O8           130.4(6)         105 0 0-1   102 0 0-1
         SC6_O9_O8           130.1(6)         105 0 0-1   103 0 0-1
         SC6_O9_O8            42.51(19)       105 0 0-1   105 0 0-1
         SC6_O9_O8            42.40(20)       105 0 0-1   106 0 0-1
         SC6_O9_O9            86.2(4)         105 0 0-1     2 1 0 0
         SC6_O9_O9            86.43(35)       105 0 0-1     4 0 1 0
         SC6_O9_O9           174.8(5)         105 0 0-1     7 0 1-1
         SC6_O9_O9             5.2(5)         105 0 0-1     7 0 1 0
         SC6_O9_O9            93.56(35)       105 0 0-1   106 0 0-1
         SC6_O9_O9            93.8(4)         105 0 0-1   108-1 0-1
          O7_O9_O7           118.5(9)           1 0 0 0     7 0 1-1
          O7_O9_O7            86.9(5)           1 0 0 0    -3 0 0 0
          O7_O9_O7            57.1(6)           1 0 0 0    -5 0 1 1
          O7_O9_O8           119.68(33)         1 0 0 0   102 0 0-1
          O7_O9_O8           178.1(9)           1 0 0 0   103 0 0-1
          O7_O9_O8            62.53(22)         1 0 0 0   105 0 0-1
          O7_O9_O8            92.58(14)         1 0 0 0   106 0 0-1
          O7_O9_O9           136.52(22)         1 0 0 0     2 1 0 0
          O7_O9_O9            91.6(5)           1 0 0 0     4 0 1 0
          O7_O9_O9           133.54(29)         1 0 0 0     7 0 1-1
          O7_O9_O9            46.68(24)         1 0 0 0     7 0 1 0
          O7_O9_O9            88.5(5)           1 0 0 0   106 0 0-1
          O7_O9_O9            43.47(22)         1 0 0 0   108-1 0-1
          O7_O9_O7            57.1(6)           7 0 1-1    -3 0 0 0
          O7_O9_O7            95.9(4)           7 0 1-1    -5 0 1 1
          O7_O9_O8            87.97(12)         7 0 1-1   102 0 0-1
          O7_O9_O8            59.76(23)         7 0 1-1   103 0 0-1
          O7_O9_O8           175.86(23)         7 0 1-1   105 0 0-1
          O7_O9_O8           121.82(31)         7 0 1-1   106 0 0-1
          O7_O9_O9            91.2(5)           7 0 1-1     2 1 0 0
          O7_O9_O9           132.03(21)         7 0 1-1     4 0 1 0
          O7_O9_O9            41.94(24)         7 0 1-1     7 0 1-1
          O7_O9_O9           137.84(28)         7 0 1-1     7 0 1 0
          O7_O9_O9            47.97(21)         7 0 1-1   106 0 0-1
          O7_O9_O9            88.8(4)           7 0 1-1   108-1 0-1
          O7_O9_O7           118.5(9)          -3 0 0 0    -5 0 1 1
          O7_O9_O8            62.53(22)        -3 0 0 0   102 0 0-1
          O7_O9_O8            92.58(14)        -3 0 0 0   103 0 0-1
          O7_O9_O8           119.68(33)        -3 0 0 0   105 0 0-1
          O7_O9_O8           178.1(9)          -3 0 0 0   106 0 0-1
          O7_O9_O9           136.52(22)        -3 0 0 0     2 1 0 0
          O7_O9_O9            91.6(5)          -3 0 0 0     4 0 1 0
          O7_O9_O9            46.68(24)        -3 0 0 0     7 0 1-1
          O7_O9_O9           133.54(29)        -3 0 0 0     7 0 1 0
          O7_O9_O9            88.5(5)          -3 0 0 0   106 0 0-1
          O7_O9_O9            43.47(22)        -3 0 0 0   108-1 0-1
          O7_O9_O8           175.86(23)        -5 0 1 1   102 0 0-1
          O7_O9_O8           121.82(31)        -5 0 1 1   103 0 0-1
          O7_O9_O8            87.97(12)        -5 0 1 1   105 0 0-1
          O7_O9_O8            59.76(23)        -5 0 1 1   106 0 0-1
          O7_O9_O9            91.2(5)          -5 0 1 1     2 1 0 0
          O7_O9_O9           132.03(21)        -5 0 1 1     4 0 1 0
          O7_O9_O9           137.84(28)        -5 0 1 1     7 0 1-1
1Ba3Cu3Sc3InO12                                                     DISAGL   Version MS-DOS 2000-10-12T12:06:39  Page  55


            Angle             Degrees         atom 1 loc  atom 3 loc
          O7_O9_O9            41.94(24)        -5 0 1 1     7 0 1 0
          O7_O9_O9            47.97(21)        -5 0 1 1   106 0 0-1
          O7_O9_O9            88.8(4)          -5 0 1 1   108-1 0-1
          O8_O9_O8            61.5(6)         102 0 0-1   103 0 0-1
          O8_O9_O8            88.14(35)       102 0 0-1   105 0 0-1
          O8_O9_O8           119.3(9)         102 0 0-1   106 0 0-1
          O8_O9_O9            90.2(4)         102 0 0-1     2 1 0 0
          O8_O9_O9            44.07(18)       102 0 0-1     4 0 1 0
          O8_O9_O9            46.04(18)       102 0 0-1     7 0 1-1
          O8_O9_O9           134.18(26)       102 0 0-1     7 0 1 0
          O8_O9_O9           135.93(18)       102 0 0-1   106 0 0-1
          O8_O9_O9            89.8(5)         102 0 0-1   108-1 0-1
          O8_O9_O8           119.3(9)         103 0 0-1   105 0 0-1
          O8_O9_O8            87.9(4)         103 0 0-1   106 0 0-1
          O8_O9_O9            43.96(18)       103 0 0-1     2 1 0 0
          O8_O9_O9            90.2(4)         103 0 0-1     4 0 1 0
          O8_O9_O9            45.93(17)       103 0 0-1     7 0 1-1
          O8_O9_O9           133.85(27)       103 0 0-1     7 0 1 0
          O8_O9_O9            89.7(5)         103 0 0-1   106 0 0-1
          O8_O9_O9           136.04(18)       103 0 0-1   108-1 0-1
          O8_O9_O8            61.5(6)         105 0 0-1   106 0 0-1
          O8_O9_O9            90.2(4)         105 0 0-1     2 1 0 0
          O8_O9_O9            44.07(18)       105 0 0-1     4 0 1 0
          O8_O9_O9           134.18(26)       105 0 0-1     7 0 1-1
          O8_O9_O9            46.04(18)       105 0 0-1     7 0 1 0
          O8_O9_O9           135.93(18)       105 0 0-1   106 0 0-1
          O8_O9_O9            89.8(5)         105 0 0-1   108-1 0-1
          O8_O9_O9            43.96(18)       106 0 0-1     2 1 0 0
          O8_O9_O9            90.2(4)         106 0 0-1     4 0 1 0
          O8_O9_O9           133.85(27)       106 0 0-1     7 0 1-1
          O8_O9_O9            45.93(17)       106 0 0-1     7 0 1 0
          O8_O9_O9            89.7(5)         106 0 0-1   106 0 0-1
          O8_O9_O9           136.04(18)       106 0 0-1   108-1 0-1
          O9_O9_O9            90.000(0)         2 1 0 0     4 0 1 0
          O9_O9_O9            89.89(15)         2 1 0 0     7 0 1-1
          O9_O9_O9            89.89(15)         2 1 0 0     7 0 1 0
          O9_O9_O9            89.89(14)         2 1 0 0   106 0 0-1
          O9_O9_O9           179.888(0)         2 1 0 0   108-1 0-1
          O9_O9_O9            90.11(14)         4 0 1 0     7 0 1-1
          O9_O9_O9            90.11(14)         4 0 1 0     7 0 1 0
          O9_O9_O9           179.901(0)         4 0 1 0   106 0 0-1
          O9_O9_O9            90.11(14)         4 0 1 0   108-1 0-1
          O9_O9_O9           179.683(2)         7 0 1-1     7 0 1 0
          O9_O9_O9            89.89(14)         7 0 1-1   106 0 0-1
          O9_O9_O9            90.11(14)         7 0 1-1   108-1 0-1
          O9_O9_O9            89.89(14)         7 0 1 0   106 0 0-1
          O9_O9_O9            90.11(14)         7 0 1 0   108-1 0-1
          O9_O9_O9            90.000(0)       106 0 0-1   108-1 0-1
Supplementary Material (ESI) for Journal of Materials Chemistry
This journal is (c) The Royal Society of Chemistry 2001
