# Supplementary figures and images for: Synthesis, stoichiometry and structure of the quaternary scandium cuprate Ba3Cu3Sc4O12 and of 334-phase solid solution members Ba3Cu3Sc4 − xInxO12 (0 ≤ x ≤ 4)
Source: Royal Society of Chemistry journal article supplement (doi:10.1039/b008787o), 2001-01-01

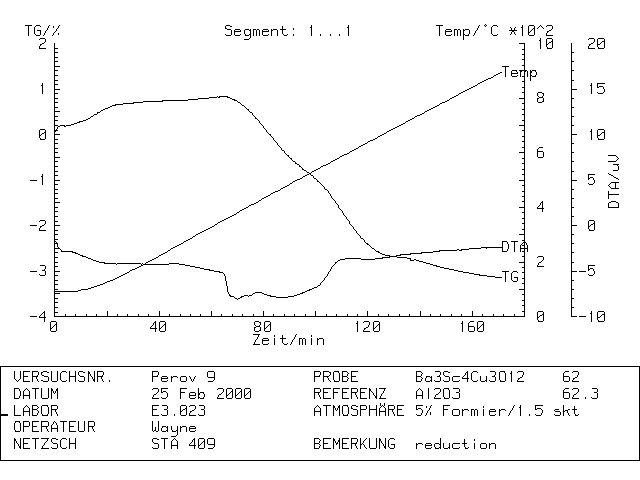

Supplement: sctga.doc [file sctga.doc]
